# Supplementary material for: Insights into Genetic Heterogeneity and Drug Resistance in Leishmania donovani of the Indian sub-continent from genomic data
Source: Research Square preprint supplement (doi:10.21203/rs.3.rs-7267613/v1), 2025-08-11
Supplement: Supplementary file 1 [file 5e4ddaf4394402cd7d0ada3a.xlsx]

## Sheet: Supplementary Table 1
Sample	Isolation Source	Stage of organism for culture	Details of the project	Year of collection
SRR776448			To add to this plethora of knowledge, we undertook whole genome sequencing of clinical isolates of L. donovani believed to be causing Kala Azar in India.	1998-2000
SRR1952814			Leishmania sp. AIIMS/LM/SS/PKDL/LD-974 Genome sequencing and assembly	2013-03-19
SRR7476899	originally isolated in India from Homo sapiens with visceral leishmaniasis on 1983-04-12	late passage	To study the Human pathogen causing Kala-azar we have captured genomes in infective and un-infective phase. It is the same strain but when we keep on culturing the organism, it looses its ability to infect the host.	2014-11-15T14:23:30Z
SRR7476972	originally isolated in India from Homo sapiens with visceral leishmaniasis on 1983-04-12	late passage	To study the Human pathogen causing Kala-azar we have captured genomes in infective and un-infective phase. It is the same strain but when we keep on culturing the organism, it looses its ability to infect the host.	2014-11-15T14:23:30Z
SRR10807182	Microbe sample from Kinetoplastea		Genome wide comparison of Leishmania donovani strains from Indian visceral leishmaniasis and para-kala-azar dermal leishmaniasis patients	2010
SRR10807183	Microbe sample from Kinetoplastea		Genome wide comparison of Leishmania donovani strains from Indian visceral leishmaniasis and para-kala-azar dermal leishmaniasis patients	2010
SRR10807184	Microbe sample from Kinetoplastea		Genome wide comparison of Leishmania donovani strains from Indian visceral leishmaniasis and para-kala-azar dermal leishmaniasis patients	2013
SRR10807185	Microbe sample from Kinetoplastea		Genome wide comparison of Leishmania donovani strains from Indian visceral leishmaniasis and para-kala-azar dermal leishmaniasis patients	2012
SRR10807186	Microbe sample from Kinetoplastea		Genome wide comparison of Leishmania donovani strains from Indian visceral leishmaniasis and para-kala-azar dermal leishmaniasis patients	2014
SRR10807187	Microbe sample from Kinetoplastea		Genome wide comparison of Leishmania donovani strains from Indian visceral leishmaniasis and para-kala-azar dermal leishmaniasis patients	2012
SRR10807188	Microbe sample from Kinetoplastea		Genome wide comparison of Leishmania donovani strains from Indian visceral leishmaniasis and para-kala-azar dermal leishmaniasis patients	2014
SRR10807189	Microbe sample from Kinetoplastea		Genome wide comparison of Leishmania donovani strains from Indian visceral leishmaniasis and para-kala-azar dermal leishmaniasis patients	2014
SRR10807190	Microbe sample from Kinetoplastea		Genome wide comparison of Leishmania donovani strains from Indian visceral leishmaniasis and para-kala-azar dermal leishmaniasis patients	2013
SRR10807191	Microbe sample from Kinetoplastea		Genome wide comparison of Leishmania donovani strains from Indian visceral leishmaniasis and para-kala-azar dermal leishmaniasis patients	2014
SRR12487477	Laboratory adapted		Visceral leishmaniasis (VL) or kala-azar, caused by Leishmania donovani is the most severe form of leishmaniasis, being fatal if left untreated. Emergence of drug resistant Leishmania parasites has repeatedly truncated the lifespan of currently available drugs. A field isolate of L. donovani (K133WT) derived from bone marrow aspirates of VL patient, propagated in medium M199 was made resistant to…	2015
SRR12487478	Laboratory adapted		Visceral leishmaniasis (VL) or kala-azar, caused by Leishmania donovani is the most severe form of leishmaniasis, being fatal if left untreated. Emergence of drug resistant Leishmania parasites has repeatedly truncated the lifespan of currently available drugs. A field isolate of L. donovani (K133WT) derived from bone marrow aspirates of VL patient, propagated in medium M199 was made resistant to…	2016
SRR12487479	Laboratory adapted		Visceral leishmaniasis (VL) or kala-azar, caused by Leishmania donovani is the most severe form of leishmaniasis, being fatal if left untreated. Emergence of drug resistant Leishmania parasites has repeatedly truncated the lifespan of currently available drugs. A field isolate of L. donovani (K133WT) derived from bone marrow aspirates of VL patient, propagated in medium M199 was made resistant to…	2000
SRR13707160		Atypical cutaneous Leishmania donovani from Himachal Pradesh	Samples of atypical Leishmania donovani causing cutaneous lesions from Himachal Pradesh were sequenced to understand the genetic basis of the atypical phenotype	2019
SRR14864628	Microbe sample from Leishmania donovani	bone marrow, Nepal	To evaluate genomic modifications potentially associated with paromomycin (PMM) resistance in Leishmania donovani, twelve experimentally selected clonal lines and the non-cloned preselection population with variable degrees of paromomycin resistance were subjected to whole genome sequencing. Genomic alterations as SNPs, Indels, chromosomal somy and gene copy number variations were compared betwee…	2003
SRR14864629	Microbe sample from Leishmania donovani	bone marrow, Nepal	To evaluate genomic modifications potentially associated with paromomycin (PMM) resistance in Leishmania donovani, twelve experimentally selected clonal lines and the non-cloned preselection population with variable degrees of paromomycin resistance were subjected to whole genome sequencing. Genomic alterations as SNPs, Indels, chromosomal somy and gene copy number variations were compared betwee…	2003
SRR14864630	Microbe sample from Leishmania donovani	bone marrow, Nepal	To evaluate genomic modifications potentially associated with paromomycin (PMM) resistance in Leishmania donovani, twelve experimentally selected clonal lines and the non-cloned preselection population with variable degrees of paromomycin resistance were subjected to whole genome sequencing. Genomic alterations as SNPs, Indels, chromosomal somy and gene copy number variations were compared betwee…	2003
SRR14864631	Microbe sample from Leishmania donovani	bone marrow, Nepal	To evaluate genomic modifications potentially associated with paromomycin (PMM) resistance in Leishmania donovani, twelve experimentally selected clonal lines and the non-cloned preselection population with variable degrees of paromomycin resistance were subjected to whole genome sequencing. Genomic alterations as SNPs, Indels, chromosomal somy and gene copy number variations were compared betwee…	2003
SRR14864632	Microbe sample from Leishmania donovani	bone marrow, Nepal	To evaluate genomic modifications potentially associated with paromomycin (PMM) resistance in Leishmania donovani, twelve experimentally selected clonal lines and the non-cloned preselection population with variable degrees of paromomycin resistance were subjected to whole genome sequencing. Genomic alterations as SNPs, Indels, chromosomal somy and gene copy number variations were compared betwee…	2003
SRR14864633	Microbe sample from Leishmania donovani	bone marrow, Nepal	To evaluate genomic modifications potentially associated with paromomycin (PMM) resistance in Leishmania donovani, twelve experimentally selected clonal lines and the non-cloned preselection population with variable degrees of paromomycin resistance were subjected to whole genome sequencing. Genomic alterations as SNPs, Indels, chromosomal somy and gene copy number variations were compared betwee…	2003
SRR14864634	Microbe sample from Leishmania donovani	bone marrow, Nepal	To evaluate genomic modifications potentially associated with paromomycin (PMM) resistance in Leishmania donovani, twelve experimentally selected clonal lines and the non-cloned preselection population with variable degrees of paromomycin resistance were subjected to whole genome sequencing. Genomic alterations as SNPs, Indels, chromosomal somy and gene copy number variations were compared betwee…	2003
SRR14864635	Microbe sample from Leishmania donovani	bone marrow, Nepal	To evaluate genomic modifications potentially associated with paromomycin (PMM) resistance in Leishmania donovani, twelve experimentally selected clonal lines and the non-cloned preselection population with variable degrees of paromomycin resistance were subjected to whole genome sequencing. Genomic alterations as SNPs, Indels, chromosomal somy and gene copy number variations were compared betwee…	2003
SRR14864636	Microbe sample from Leishmania donovani	bone marrow, Nepal	To evaluate genomic modifications potentially associated with paromomycin (PMM) resistance in Leishmania donovani, twelve experimentally selected clonal lines and the non-cloned preselection population with variable degrees of paromomycin resistance were subjected to whole genome sequencing. Genomic alterations as SNPs, Indels, chromosomal somy and gene copy number variations were compared betwee…	2003
SRR14864637	Microbe sample from Leishmania donovani	bone marrow, Nepal	To evaluate genomic modifications potentially associated with paromomycin (PMM) resistance in Leishmania donovani, twelve experimentally selected clonal lines and the non-cloned preselection population with variable degrees of paromomycin resistance were subjected to whole genome sequencing. Genomic alterations as SNPs, Indels, chromosomal somy and gene copy number variations were compared betwee…	2003
SRR14864638	Microbe sample from Leishmania donovani	bone marrow, Nepal	To evaluate genomic modifications potentially associated with paromomycin (PMM) resistance in Leishmania donovani, twelve experimentally selected clonal lines and the non-cloned preselection population with variable degrees of paromomycin resistance were subjected to whole genome sequencing. Genomic alterations as SNPs, Indels, chromosomal somy and gene copy number variations were compared betwee…	2003
SRR14864639	Microbe sample from Leishmania donovani	bone marrow, Nepal	To evaluate genomic modifications potentially associated with paromomycin (PMM) resistance in Leishmania donovani, twelve experimentally selected clonal lines and the non-cloned preselection population with variable degrees of paromomycin resistance were subjected to whole genome sequencing. Genomic alterations as SNPs, Indels, chromosomal somy and gene copy number variations were compared betwee…	2003
SRR14864640	Microbe sample from Leishmania donovani	bone marrow, Nepal	To evaluate genomic modifications potentially associated with paromomycin (PMM) resistance in Leishmania donovani, twelve experimentally selected clonal lines and the non-cloned preselection population with variable degrees of paromomycin resistance were subjected to whole genome sequencing. Genomic alterations as SNPs, Indels, chromosomal somy and gene copy number variations were compared betwee…	2003
SRR15851293	Biological Replicate 1		Integrated genome, transcriptome, proteome and metabolome experiment of Leishmania donovani. This submission contains the genome and transcriptome data.	2009
SRR15851294	Biological Replicate 1		Integrated genome, transcriptome, proteome and metabolome experiment of Leishmania donovani. This submission contains the genome and transcriptome data.	2003

## Sheet: Supplementary Table 2
Accession	Strain	Accession	Strain	Accession	Strain	Accession	Strain
SRR10807182	MHOM/IN/2010/T3	SRR10807187	MHOM/IN/2012/T9	SRR12487477	K133PMM-R	SRR14864630	BPK275/0-cl18.iii
SRR10807183	MHOM/IN/2010/T7	SRR10807188	MHOM/IN/2014/T10	SRR12487478	K133AS-R	SRR14864631	BPK275/0-cl18.iv
SRR10807184	MHOM/IN/2013/P2	SRR10807189	MHOM/IN/2014/P6	SRR12487479	K133WT	SRR14864632	BPK275/0-cl18.v
SRR10807185	MHOM/IN/2012/T8	SRR10807190	MHOM/IN/2013/M1	SRR14864628	BPK275/0-cl18.i	SRR14864633	BPK275/0-cl18.vi
SRR10807186	MHOM/IN/2014/H1	SRR10807191	MHOM/IN/2014/A2	SRR14864629	BPK275/0-cl18.ii	SRR14864634	BPK275/0-cl18.vii
SRR14864635	BPK275/0-cl18.viii	SRR14864640	BPK275/0-cl18.xiii	SRR6257366	MON-37.iii	SRR6257371	MON-37.viii
SRR14864636	BPK275/0-cl18.ix	SRR15851293	BHU 575/0 cl2	SRR6257367	MON-37.iv	SRR7476899	MHOM/IN/1983/AG83.i
SRR14864637	BPK275/0-cl18.x	SRR15851294	BPK275/0 cl18	SRR6257368	MON-37.v	SRR7476972	MHOM/IN/1983/AG83.ii
SRR14864638	BPK275/0-cl18.xi	SRR6257364	MON-37.i	SRR6257369	MON-37.vi	SRR776448	BHU 1220
SRR14864639	BPK275/0-cl18.xii	SRR6257365	MON-37.ii	SRR6257370	MON-37.vii	SRR13707160	HPCL66

## Sheet: Supplementary Table 3
Hugo_Symbol	Chromosome	Start_Position	End_Position	HGVSc	HGVSp
LDBPK_010020	FR799588.2	6093	6093	c.1319C>G	p.Pro440Arg
LDBPK_010020	FR799588.2	6389	6389	c.1023A>T	p.Leu341Phe
LDBPK_010020	FR799588.2	6589	6589	c.823G>A	p.Val275Ile
LDBPK_010030	FR799588.2	9347	9347	c.1678G>A	p.Val560Met
LDBPK_010040	FR799588.2	12022	12022	c.545T>A	p.Val182Glu
LDBPK_010050	FR799588.2	16017	16017	c.1016T>C	p.Met339Thr
LDBPK_010070	FR799588.2	20100	20100	c.1675G>A	p.Gly559Ser
LDBPK_010070	FR799588.2	20204	20204	c.1571C>T	p.Pro524Leu
LDBPK_010080	FR799588.2	22622	22622	c.706A>G	p.Arg236Gly
LDBPK_010110	FR799588.2	29246	29246	c.139T>G	p.Ser47Ala
LDBPK_010120	FR799588.2	30900	30900	c.1666T>C	p.Ser556Pro
LDBPK_010120	FR799588.2	30912	30912	c.1654C>G	p.Pro552Ala
LDBPK_010130	FR799588.2	34291	34291	c.657A>G	p.Ile219Met
LDBPK_010130	FR799588.2	34311	34311	c.637C>G	p.Pro213Ala
LDBPK_010140	FR799588.2	37390	37390	c.83G>A	p.Ser28Asn
LDBPK_010170	FR799588.2	42095	42095	c.1337G>T	p.Arg446Leu
LDBPK_010170	FR799588.2	42125	42125	c.1307C>T	p.Ala436Val
LDBPK_010170	FR799588.2	42314	42314	c.1118T>C	p.Leu373Ser
LDBPK_010170	FR799588.2	42509	42509	c.923C>A	p.Thr308Lys
LDBPK_010170	FR799588.2	42652	42652	c.780A>C	p.Arg260Ser
LDBPK_010170	FR799588.2	43091	43091	c.341T>C	p.Val114Ala
LDBPK_010180	FR799588.2	46880	46880	c.295C>A	p.Leu99Ile
LDBPK_010190	FR799588.2	48654	48654	c.600G>C	p.Trp200Cys
LDBPK_010200	FR799588.2	49961	49961	c.896T>C	p.Met299Thr
LDBPK_010210	FR799588.2	53237	53237	c.1189T>C	p.Ser397Pro
LDBPK_010210	FR799588.2	53566	53566	c.860C>T	p.Ala287Val
LDBPK_010220	FR799588.2	58719	58719	c.419G>T	p.Arg140Leu
LDBPK_010220	FR799588.2	58846	58846	c.292G>A	p.Gly98Ser
LDBPK_010240	FR799588.2	64229	64229	c.2068T>C	p.Ser690Pro
LDBPK_010250	FR799588.2	67883	67883	c.2557A>G	p.Ile853Val
LDBPK_010250	FR799588.2	68612	68612	c.1828T>C	p.Cys610Arg
LDBPK_010250	FR799588.2	69263	69263	c.1177A>G	p.Asn393Asp
LDBPK_010250	FR799588.2	69976	69976	c.464C>G	p.Ala155Gly
LDBPK_010260	FR799588.2	71848	71848	c.482G>T	p.Gly161Val
LDBPK_010260	FR799588.2	71905	71905	c.425G>A	p.Arg142His
LDBPK_010260	FR799588.2	71987	71987	c.343C>T	p.Pro115Ser
LDBPK_010310	FR799588.2	81010	81010	c.232T>C	p.Phe78Leu
LDBPK_010320	FR799588.2	81801	81801	c.232G>T	p.Ala78Ser
LDBPK_010340	FR799588.2	84416	84416	c.55T>G	p.Leu19Val
LDBPK_010370	FR799588.2	90732	90732	c.1331T>C	p.Leu444Pro
LDBPK_010370	FR799588.2	90789	90789	c.1388G>A	p.Gly463Asp
LDBPK_010370	FR799588.2	90818	90818	c.1417G>A	p.Glu473Lys
LDBPK_010380	FR799588.2	92481	92481	c.8C>T	p.Pro3Leu
LDBPK_010380	FR799588.2	93013	93013	c.540C>A	p.Asp180Glu
LDBPK_010390	FR799588.2	93773	93773	c.100G>T	p.Val34Phe
LDBPK_010390	FR799588.2	94161	94161	c.488C>A	p.Pro163Gln
LDBPK_010400	FR799588.2	95677	95677	c.593G>A	p.Gly198Glu
LDBPK_010400	FR799588.2	96900	96900	c.1816G>A	p.Val606Ile
LDBPK_010410	FR799588.2	98847	98847	c.403G>A	p.Val135Ile
LDBPK_010410	FR799588.2	99090	99090	c.646G>A	p.Glu216Lys
LDBPK_010410	FR799588.2	100223	100223	c.1779G>C	p.Gln593His
LDBPK_010440	FR799588.2	106158	106158	c.230T>C	p.Val77Ala
LDBPK_010450	FR799588.2	108552	108552	c.602A>G	p.Asp201Gly
LDBPK_010450	FR799588.2	108576	108576	c.626G>A	p.Gly209Asp
LDBPK_010450	FR799588.2	108690	108690	c.740A>G	p.Asp247Gly
LDBPK_010450	FR799588.2	109056	109056	c.1106T>G	p.Val369Gly
LDBPK_010450	FR799588.2	109490	109490	c.1540G>A	p.Val514Ile
LDBPK_010450	FR799588.2	109854	109854	c.1904T>C	p.Val635Ala
LDBPK_010460	FR799588.2	112093	112093	c.569C>T	p.Ala190Val
LDBPK_010460	FR799588.2	112479	112479	c.955G>T	p.Ala319Ser
LDBPK_010460	FR799588.2	112941	112941	c.1417G>T	p.Ala473Ser
LDBPK_010460	FR799588.2	113209	113209	c.1685T>C	p.Val562Ala
LDBPK_010480	FR799588.2	120029	120029	c.622G>C	p.Ala208Pro
LDBPK_010480	FR799588.2	121581	121581	c.2174A>C	p.Glu725Ala
LDBPK_010480	FR799588.2	121784	121784	c.2377G>A	p.Ala793Thr
LDBPK_010480	FR799588.2	121817	121817	c.2410A>G	p.Thr804Ala
LDBPK_010480	FR799588.2	121885	121885	c.2478A>C	p.Glu826Asp
LDBPK_010480	FR799588.2	122202	122202	c.2795C>T	p.Ala932Val
LDBPK_010480	FR799588.2	123525	123525	c.4118C>A	p.Ala1373Asp
LDBPK_010490	FR799588.2	128071	128071	c.53T>C	p.Val18Ala
LDBPK_010490	FR799588.2	128213	128213	c.195A>C	p.Glu65Asp
LDBPK_010490	FR799588.2	128260	128260	c.242G>C	p.Gly81Ala
LDBPK_010490	FR799588.2	128646	128646	c.628A>G	p.Asn210Asp
LDBPK_010500	FR799588.2	130958	130958	c.29C>T	p.Ala10Val
LDBPK_010500	FR799588.2	131333	131333	c.404T>G	p.Leu135Arg
LDBPK_010500	FR799588.2	131730	131730	c.801A>C	p.Leu267Phe
LDBPK_010540	FR799588.2	144300	144300	c.235A>G	p.Thr79Ala
LDBPK_010540	FR799588.2	144789	144789	c.724G>A	p.Ala242Thr
LDBPK_010540	FR799588.2	145329	145329	c.1264A>G	p.Lys422Glu
LDBPK_010550	FR799588.2	150390	150390	c.548A>G	p.Asn183Ser
LDBPK_010550	FR799588.2	150921	150921	c.1079A>T	p.Gln360Leu
LDBPK_010550	FR799588.2	150935	150935	c.1093G>A	p.Ala365Thr
LDBPK_010550	FR799588.2	152325	152325	c.2483C>T	p.Ala828Val
LDBPK_010550	FR799588.2	152988	152988	c.3146G>A	p.Gly1049Asp
LDBPK_010560	FR799588.2	155873	155873	c.172A>G	p.Asn58Asp
LDBPK_010560	FR799588.2	156137	156137	c.436A>G	p.Met146Val
LDBPK_010560	FR799588.2	156843	156843	c.1142G>A	p.Cys381Tyr
LDBPK_010570	FR799588.2	159306	159306	c.68A>C	p.Glu23Ala
LDBPK_010570	FR799588.2	160037	160037	c.799A>T	p.Thr267Ser
LDBPK_010580	FR799588.2	161500	161500	c.79A>C	p.Lys27Gln
LDBPK_010580	FR799588.2	161597	161597	c.176T>A	p.Ile59Asn
LDBPK_010580	FR799588.2	161624	161624	c.203T>C	p.Met68Thr
LDBPK_010580	FR799588.2	162070	162070	c.649T>C	p.Cys217Arg
LDBPK_010580	FR799588.2	162403	162403	c.982C>A	p.Pro328Thr
LDBPK_010580	FR799588.2	163282	163282	c.1861C>G	p.Arg621Gly
LDBPK_010590	FR799588.2	164173	164173	c.260G>T	p.Cys87Phe
LDBPK_010590	FR799588.2	164568	164568	c.655G>T	p.Val219Phe
LDBPK_010590	FR799588.2	164857	164857	c.944C>T	p.Ser315Leu
LDBPK_010600	FR799588.2	166947	166947	c.968G>T	p.Ser323Ile
LDBPK_010620	FR799588.2	173020	173020	c.370G>T	p.Gly124Cys
LDBPK_010620	FR799588.2	173221	173221	c.571T>A	p.Phe191Ile
LDBPK_010620	FR799588.2	174613	174613	c.1963G>A	p.Gly655Ser
LDBPK_010620	FR799588.2	174716	174716	c.2066G>A	p.Arg689His
LDBPK_010620	FR799588.2	174929	174929	c.2279T>C	p.Val760Ala
LDBPK_010620	FR799588.2	175705	175705	c.3055T>G	p.Cys1019Gly
LDBPK_010620	FR799588.2	175877	175877	c.3227A>G	p.Lys1076Arg
LDBPK_010620	FR799588.2	176890	176890	c.4240C>T	p.His1414Tyr
LDBPK_010620	FR799588.2	177173	177173	c.4523A>G	p.Lys1508Arg
LDBPK_010620	FR799588.2	177605	177605	c.4955G>T	p.Gly1652Val
LDBPK_010620	FR799588.2	177631	177631	c.4981A>G	p.Thr1661Ala
LDBPK_010640	FR799588.2	181271	181271	c.818G>A	p.Arg273His
LDBPK_010640	FR799588.2	181390	181390	c.937A>G	p.Ser313Gly
LDBPK_010640	FR799588.2	181658	181658	c.1205A>C	p.Glu402Ala
LDBPK_010640	FR799588.2	182195	182195	c.1742C>T	p.Thr581Met
LDBPK_010650	FR799588.2	184691	184691	c.685G>A	p.Gly229Ser
LDBPK_010650	FR799588.2	184698	184698	c.692G>C	p.Arg231Pro
LDBPK_010650	FR799588.2	184826	184826	c.820T>C	p.Cys274Arg
LDBPK_010650	FR799588.2	184898	184898	c.892G>A	p.Ala298Thr
LDBPK_010650	FR799588.2	185799	185799	c.1793A>G	p.Gln598Arg
LDBPK_010660	FR799588.2	188307	188307	c.5A>G	p.His2Arg
LDBPK_010660	FR799588.2	189026	189026	c.724A>G	p.Thr242Ala
LDBPK_010660	FR799588.2	190584	190584	c.2282T>G	p.Val761Gly
LDBPK_010660	FR799588.2	191499	191499	c.3197G>A	p.Arg1066Gln
LDBPK_010670	FR799588.2	193357	193357	c.767C>T	p.Ala256Val
LDBPK_010680	FR799588.2	196022	196022	c.740C>A	p.Ala247Glu
LDBPK_010680	FR799588.2	196169	196169	c.887A>G	p.Glu296Gly
LDBPK_010680	FR799588.2	198193	198193	c.2911G>A	p.Ala971Thr
LDBPK_010680	FR799588.2	198470	198470	c.3188G>A	p.Arg1063His
LDBPK_010690	FR799588.2	201157	201157	c.236A>G	p.Asn79Ser
LDBPK_010730	FR799588.2	218001	218001	c.737C>A	p.Ala246Glu
LDBPK_010740	FR799588.2	220713	220713	c.277T>C	p.Phe93Leu
LDBPK_010740	FR799588.2	223149	223149	c.2713G>A	p.Asp905Asn
LDBPK_010740	FR799588.2	223615	223615	c.3179C>T	p.Pro1060Leu
LDBPK_010740	FR799588.2	224266	224266	c.3830C>T	p.Ala1277Val
LDBPK_010750	FR799588.2	226747	226747	c.841A>C	p.Thr281Pro
LDBPK_010750	FR799588.2	228151	228151	c.2245A>G	p.Ser749Gly
LDBPK_010750	FR799588.2	228388	228388	c.2482A>C	p.Lys828Gln
LDBPK_010750	FR799588.2	231685	231685	c.5779C>A	p.His1927Asn
LDBPK_010760	FR799588.2	234896	234896	c.1186G>T	p.Ala396Ser
LDBPK_010760	FR799588.2	235193	235193	c.1483A>G	p.Lys495Glu
LDBPK_010760	FR799588.2	235250	235250	c.1540G>A	p.Gly514Ser
LDBPK_010770	FR799588.2	237232	237232	c.182G>C	p.Arg61Pro
LDBPK_010770	FR799588.2	239147	239147	c.2097C>G	p.His699Gln
LDBPK_010770	FR799588.2	241174	241174	c.4124A>C	p.Asp1375Ala
LDBPK_010780	FR799588.2	242489	242489	c.193G>A	p.Ala65Thr
LDBPK_010810	FR799588.2	251938	251938	c.559G>A	p.Asp187Asn
LDBPK_010830	FR799588.2	260985	260985	c.2568T>G	p.Asp856Glu
LDBPK_010830	FR799588.2	261259	261259	c.2842C>T	p.Pro948Ser
LDBPK_020020	FR799589.2	5651	5651	c.416G>A	p.Gly139Asp
LDBPK_020050	FR799589.2	12442	12442	c.1741G>T	p.Ala581Ser
LDBPK_020050	FR799589.2	13869	13869	c.314C>T	p.Ser105Leu
LDBPK_020050	FR799589.2	14058	14058	c.125G>C	p.Ser42Thr
LDBPK_020060	FR799589.2	16635	16635	c.91C>T	p.Arg31Cys
LDBPK_020080	FR799589.2	22158	22158	c.2384G>A	p.Gly795Glu
LDBPK_020080	FR799589.2	22752	22752	c.1790T>C	p.Leu597Pro
LDBPK_020080	FR799589.2	23194	23194	c.1348C>G	p.Arg450Gly
LDBPK_020080	FR799589.2	23849	23849	c.693G>C	p.Glu231Asp
LDBPK_020080	FR799589.2	23869	23869	c.673G>A	p.Ala225Thr
LDBPK_020090	FR799589.2	27914	27914	c.2374G>A	p.Gly792Ser
LDBPK_020090	FR799589.2	28097	28097	c.2191G>T	p.Gly731Cys
LDBPK_020090	FR799589.2	28772	28772	c.1516G>C	p.Val506Leu
LDBPK_020090	FR799589.2	28823	28823	c.1465A>G	p.Thr489Ala
LDBPK_020090	FR799589.2	28901	28901	c.1387C>T	p.Arg463Trp
LDBPK_020100	FR799589.2	32354	32354	c.14465T>C	p.Met4822Thr
LDBPK_020100	FR799589.2	33245	33245	c.13574A>C	p.Asp4525Ala
LDBPK_020100	FR799589.2	33473	33473	c.13346G>A	p.Gly4449Asp
LDBPK_020100	FR799589.2	33543	33543	c.13276A>G	p.Thr4426Ala
LDBPK_020100	FR799589.2	33861	33861	c.12958T>G	p.Leu4320Val
LDBPK_020100	FR799589.2	34154	34154	c.12665T>C	p.Val4222Ala
LDBPK_020100	FR799589.2	34233	34233	c.12586G>A	p.Ala4196Thr
LDBPK_020100	FR799589.2	34419	34419	c.12400A>G	p.Ser4134Gly
LDBPK_020100	FR799589.2	35088	35088	c.11731G>A	p.Val3911Ile
LDBPK_020100	FR799589.2	35751	35751	c.11068T>C	p.Cys3690Arg
LDBPK_020100	FR799589.2	37616	37616	c.9203C>T	p.Thr3068Ile
LDBPK_020100	FR799589.2	38139	38139	c.8680C>T	p.Arg2894Cys
LDBPK_020100	FR799589.2	38874	38874	c.7945G>A	p.Asp2649Asn
LDBPK_020100	FR799589.2	40614	40614	c.6205G>A	p.Val2069Ile
LDBPK_020100	FR799589.2	41112	41112	c.5707C>T	p.Pro1903Ser
LDBPK_020100	FR799589.2	42731	42731	c.4088C>A	p.Ala1363Glu
LDBPK_020100	FR799589.2	43963	43963	c.2856G>T	p.Arg952Ser
LDBPK_020100	FR799589.2	44550	44550	c.2269G>A	p.Asp757Asn
LDBPK_020100	FR799589.2	46223	46223	c.596A>G	p.Asp199Gly
LDBPK_020120	FR799589.2	50414	50414	c.1426A>G	p.Ile476Val
LDBPK_020130	FR799589.2	55268	55268	c.4636G>A	p.Ala1546Thr
LDBPK_020130	FR799589.2	56047	56047	c.3857T>C	p.Leu1286Pro
LDBPK_020130	FR799589.2	56172	56172	c.3732C>A	p.Asp1244Glu
LDBPK_020130	FR799589.2	56301	56301	c.3603A>T	p.Glu1201Asp
LDBPK_020130	FR799589.2	56377	56377	c.3527G>A	p.Arg1176Gln
LDBPK_020130	FR799589.2	56564	56564	c.3340C>G	p.Pro1114Ala
LDBPK_020130	FR799589.2	56566	56566	c.3338G>A	p.Gly1113Asp
LDBPK_020130	FR799589.2	56948	56948	c.2956C>T	p.Pro986Ser
LDBPK_020130	FR799589.2	56974	56974	c.2930T>C	p.Leu977Pro
LDBPK_020130	FR799589.2	57448	57448	c.2456T>A	p.Met819Lys
LDBPK_020130	FR799589.2	57737	57737	c.2167G>A	p.Ala723Thr
LDBPK_020130	FR799589.2	58057	58057	c.1847T>C	p.Ile616Thr
LDBPK_020130	FR799589.2	58058	58058	c.1846A>G	p.Ile616Val
LDBPK_020130	FR799589.2	58318	58318	c.1586A>G	p.Asp529Gly
LDBPK_020130	FR799589.2	59068	59068	c.836G>A	p.Gly279Asp
LDBPK_020130	FR799589.2	59069	59069	c.835G>A	p.Gly279Ser
LDBPK_020130	FR799589.2	59086	59086	c.818T>G	p.Leu273Arg
LDBPK_020130	FR799589.2	59671	59671	c.233T>C	p.Val78Ala
LDBPK_020140	FR799589.2	69645	69645	c.500G>A	p.Ser167Asn
LDBPK_020140	FR799589.2	69829	69829	c.316C>A	p.Arg106Ser
LDBPK_020150	FR799589.2	76626	76626	c.319A>C	p.Ile107Leu
LDBPK_020170	FR799589.2	89764	89764	c.541G>T	p.Ala181Ser
LDBPK_020170	FR799589.2	90076	90076	c.229G>C	p.Glu77Gln
LDBPK_020180	FR799589.2	95703	95703	c.919G>A	p.Gly307Ser
LDBPK_020180	FR799589.2	96042	96042	c.580G>A	p.Asp194Asn
LDBPK_020180	FR799589.2	96356	96356	c.266C>T	p.Ala89Val
LDBPK_020190	FR799589.2	100512	100512	c.2050G>A	p.Val684Ile
LDBPK_020190	FR799589.2	100701	100701	c.1861C>T	p.His621Tyr
LDBPK_020190	FR799589.2	100751	100751	c.1811G>A	p.Cys604Tyr
LDBPK_020190	FR799589.2	100931	100931	c.1631C>T	p.Ala544Val
LDBPK_020190	FR799589.2	101184	101184	c.1378G>A	p.Ala460Thr
LDBPK_020190	FR799589.2	101186	101186	c.1376A>C	p.Asp459Ala
LDBPK_020190	FR799589.2	101241	101241	c.1321T>C	p.Cys441Arg
LDBPK_020190	FR799589.2	101558	101558	c.1004T>C	p.Val335Ala
LDBPK_020190	FR799589.2	101630	101630	c.932A>G	p.His311Arg
LDBPK_020190	FR799589.2	102368	102368	c.194C>T	p.Ala65Val
LDBPK_020200	FR799589.2	105108	105108	c.1901G>A	p.Arg634His
LDBPK_020200	FR799589.2	105286	105286	c.1723T>C	p.Cys575Arg
LDBPK_020200	FR799589.2	105331	105331	c.1678A>G	p.Met560Val
LDBPK_020200	FR799589.2	105628	105628	c.1381T>C	p.Ser461Pro
LDBPK_020200	FR799589.2	106011	106011	c.998T>C	p.Ile333Thr
LDBPK_020200	FR799589.2	106110	106110	c.899A>T	p.Gln300Leu
LDBPK_020200	FR799589.2	106657	106657	c.352A>G	p.Met118Val
LDBPK_020210	FR799589.2	111396	111396	c.527T>A	p.Val176Asp
LDBPK_020220	FR799589.2	113761	113761	c.3295T>C	p.Phe1099Leu
LDBPK_020220	FR799589.2	113786	113786	c.3270G>A	p.Met1090Ile
LDBPK_020220	FR799589.2	115006	115006	c.2050A>G	p.Ser684Gly
LDBPK_020220	FR799589.2	115192	115192	c.1864C>T	p.Pro622Ser
LDBPK_020220	FR799589.2	115225	115225	c.1831G>A	p.Ala611Thr
LDBPK_020220	FR799589.2	115412	115412	c.1644G>A	p.Met548Ile
LDBPK_020220	FR799589.2	116155	116155	c.901G>T	p.Ala301Ser
LDBPK_020220	FR799589.2	116793	116793	c.263A>G	p.Glu88Gly
LDBPK_020230	FR799589.2	118894	118894	c.476T>C	p.Phe159Ser
LDBPK_020260	FR799589.2	124905	124905	c.1245A>C	p.Gln415His
LDBPK_020260	FR799589.2	125987	125987	c.163T>C	p.Ser55Pro
LDBPK_020270	FR799589.2	134468	134468	c.4474C>A	p.Leu1492Met
LDBPK_020280	FR799589.2	144493	144493	c.350T>C	p.Leu117Pro
LDBPK_020280	FR799589.2	144665	144665	c.178G>A	p.Gly60Arg
LDBPK_020280	FR799589.2	144671	144671	c.172G>A	p.Val58Met
LDBPK_020300	FR799589.2	147640	147640	c.4577C>A	p.Ala1526Glu
LDBPK_020300	FR799589.2	147644	147644	c.4573G>T	p.Ala1525Ser
LDBPK_020300	FR799589.2	147976	147976	c.4241C>A	p.Thr1414Lys
LDBPK_020300	FR799589.2	148421	148421	c.3796A>G	p.Asn1266Asp
LDBPK_020300	FR799589.2	148448	148448	c.3769G>A	p.Val1257Ile
LDBPK_020300	FR799589.2	148480	148480	c.3737C>T	p.Ala1246Val
LDBPK_020300	FR799589.2	148568	148568	c.3649C>A	p.His1217Asn
LDBPK_020300	FR799589.2	148810	148810	c.3407G>T	p.Arg1136Leu
LDBPK_020300	FR799589.2	149648	149648	c.2569A>G	p.Thr857Ala
LDBPK_020300	FR799589.2	150388	150388	c.1829A>G	p.Glu610Gly
LDBPK_020300	FR799589.2	150698	150698	c.1519C>T	p.Arg507Trp
LDBPK_020300	FR799589.2	150946	150946	c.1271T>G	p.Val424Gly
LDBPK_020300	FR799589.2	150984	150984	c.1233G>C	p.Glu411Asp
LDBPK_020300	FR799589.2	151246	151246	c.971C>T	p.Ala324Val
LDBPK_020300	FR799589.2	151250	151250	c.967A>C	p.Met323Leu
LDBPK_020300	FR799589.2	151457	151457	c.760C>T	p.Leu254Phe
LDBPK_020300	FR799589.2	151571	151571	c.646G>A	p.Val216Ile
LDBPK_020300	FR799589.2	151670	151670	c.547C>G	p.Gln183Glu
LDBPK_020300	FR799589.2	151708	151708	c.509C>G	p.Thr170Ser
LDBPK_020310	FR799589.2	154604	154604	c.1757T>C	p.Val586Ala
LDBPK_020310	FR799589.2	154714	154714	c.1647C>A	p.Asp549Glu
LDBPK_020310	FR799589.2	154799	154799	c.1562C>T	p.Ala521Val
LDBPK_020310	FR799589.2	155024	155024	c.1337G>T	p.Cys446Phe
LDBPK_020310	FR799589.2	155120	155120	c.1241G>C	p.Trp414Ser
LDBPK_020310	FR799589.2	155187	155187	c.1174C>T	p.Leu392Phe
LDBPK_020310	FR799589.2	155291	155291	c.1070G>A	p.Arg357Gln
LDBPK_020310	FR799589.2	155417	155417	c.944G>A	p.Arg315Gln
LDBPK_020310	FR799589.2	155712	155712	c.649T>C	p.Ser217Pro
LDBPK_020320	FR799589.2	158761	158761	c.1949T>C	p.Val650Ala
LDBPK_020320	FR799589.2	159586	159586	c.1124A>G	p.Glu375Gly
LDBPK_020320	FR799589.2	159984	159984	c.726C>A	p.Asp242Glu
LDBPK_020320	FR799589.2	160376	160376	c.334A>G	p.Thr112Ala
LDBPK_020330	FR799589.2	162473	162473	c.1132G>A	p.Val378Ile
LDBPK_020340	FR799589.2	166339	166339	c.433G>A	p.Glu145Lys
LDBPK_020390	FR799589.2	178354	178354	c.3038T>C	p.Val1013Ala
LDBPK_020390	FR799589.2	180833	180833	c.559C>T	p.His187Tyr
LDBPK_020400	FR799589.2	185681	185681	c.702G>A	p.Met234Ile
LDBPK_020440	FR799589.2	200174	200174	c.10526G>C	p.Ser3509Thr
LDBPK_020440	FR799589.2	200187	200187	c.10513A>G	p.Arg3505Gly
LDBPK_020440	FR799589.2	200204	200204	c.10496T>C	p.Val3499Ala
LDBPK_020440	FR799589.2	200246	200246	c.10454C>T	p.Thr3485Ile
LDBPK_020440	FR799589.2	200436	200436	c.10264T>C	p.Ser3422Pro
LDBPK_020440	FR799589.2	201177	201177	c.9523C>T	p.Pro3175Ser
LDBPK_020440	FR799589.2	201540	201540	c.9160A>G	p.Asn3054Asp
LDBPK_020440	FR799589.2	201633	201633	c.9067C>T	p.Pro3023Ser
LDBPK_020440	FR799589.2	201879	201879	c.8821T>C	p.Ser2941Pro
LDBPK_020440	FR799589.2	201942	201942	c.8758T>G	p.Phe2920Val
LDBPK_020440	FR799589.2	201944	201944	c.8756C>T	p.Ala2919Val
LDBPK_020440	FR799589.2	202159	202159	c.8541G>C	p.Glu2847Asp
LDBPK_020440	FR799589.2	202314	202314	c.8386T>G	p.Phe2796Val
LDBPK_020440	FR799589.2	202367	202367	c.8333A>G	p.Asp2778Gly
LDBPK_020440	FR799589.2	204626	204626	c.6074C>T	p.Ala2025Val
LDBPK_020440	FR799589.2	205415	205415	c.5285G>A	p.Ser1762Asn
LDBPK_020440	FR799589.2	205770	205770	c.4930T>C	p.Ser1644Pro
LDBPK_020440	FR799589.2	206021	206021	c.4679T>C	p.Val1560Ala
LDBPK_020440	FR799589.2	206754	206754	c.3946G>A	p.Asp1316Asn
LDBPK_020440	FR799589.2	207857	207857	c.2843G>A	p.Gly948Asp
LDBPK_020440	FR799589.2	208125	208125	c.2575A>C	p.Ser859Arg
LDBPK_020440	FR799589.2	208253	208253	c.2447G>A	p.Ser816Asn
LDBPK_020450	FR799589.2	212588	212588	c.373G>A	p.Val125Met
LDBPK_020450	FR799589.2	212873	212873	c.88G>A	p.Ala30Thr
LDBPK_020460	FR799589.2	214015	214015	c.1940C>A	p.Ala647Glu
LDBPK_020460	FR799589.2	214061	214061	c.1894A>G	p.Thr632Ala
LDBPK_020460	FR799589.2	215203	215203	c.752G>A	p.Arg251Gln
LDBPK_020470	FR799589.2	218405	218405	c.2476T>C	p.Cys826Arg
LDBPK_020470	FR799589.2	219728	219728	c.1153T>C	p.Cys385Arg
LDBPK_020470	FR799589.2	220723	220723	c.158T>C	p.Val53Ala
LDBPK_020470	FR799589.2	220874	220874	c.7G>A	p.Ala3Thr
LDBPK_020490	FR799589.2	224457	224457	c.6236T>C	p.Leu2079Pro
LDBPK_020490	FR799589.2	225019	225019	c.5674T>C	p.Cys1892Arg
LDBPK_020490	FR799589.2	225787	225787	c.4906A>G	p.Thr1636Ala
LDBPK_020490	FR799589.2	226170	226170	c.4523C>T	p.Pro1508Leu
LDBPK_020490	FR799589.2	228048	228048	c.2645G>T	p.Gly882Val
LDBPK_020490	FR799589.2	228181	228181	c.2512G>T	p.Val838Leu
LDBPK_020490	FR799589.2	229062	229062	c.1631C>G	p.Ala544Gly
LDBPK_020490	FR799589.2	230382	230382	c.311A>T	p.Glu104Val
LDBPK_020500	FR799589.2	239524	239524	c.217T>G	p.Tyr73Asp
LDBPK_020530	FR799589.2	246483	246483	c.2432T>A	p.Val811Glu
LDBPK_020530	FR799589.2	246814	246814	c.2101G>A	p.Gly701Ser
LDBPK_020530	FR799589.2	247714	247714	c.1201G>A	p.Gly401Ser
LDBPK_020530	FR799589.2	248050	248050	c.865C>A	p.Gln289Lys
LDBPK_020530	FR799589.2	248518	248518	c.397A>G	p.Thr133Ala
LDBPK_020550	FR799589.2	269938	269938	c.108G>C	p.Leu36Phe
LDBPK_020550	FR799589.2	269982	269982	c.152G>A	p.Arg51His
LDBPK_020550	FR799589.2	274227	274227	c.4397T>C	p.Val1466Ala
LDBPK_020550	FR799589.2	274778	274778	c.4948G>A	p.Ala1650Thr
LDBPK_020550	FR799589.2	280826	280826	c.10996G>T	p.Ala3666Ser
LDBPK_020560	FR799589.2	282540	282540	c.560T>C	p.Val187Ala
LDBPK_020570	FR799589.2	284898	284898	c.293A>C	p.Glu98Ala
LDBPK_020580	FR799589.2	287062	287062	c.245G>A	p.Arg82His
LDBPK_020590	FR799589.2	289763	289763	c.790A>G	p.Arg264Gly
LDBPK_020590	FR799589.2	290486	290486	c.1513G>A	p.Ala505Thr
LDBPK_020610	FR799589.2	297451	297451	c.2270G>A	p.Gly757Asp
LDBPK_020610	FR799589.2	297555	297555	c.2374G>A	p.Ala792Thr
LDBPK_020620	FR799589.2	300742	300742	c.791C>T	p.Pro264Leu
LDBPK_020660	FR799589.2	310536	310536	c.44C>T	p.Ala15Val
LDBPK_020670	FR799589.2	313306	313306	c.662T>C	p.Met221Thr
LDBPK_020670	FR799589.2	314583	314583	c.1939C>T	p.Arg647Cys
LDBPK_020670	FR799589.2	314706	314706	c.2062G>A	p.Gly688Ser
LDBPK_020670	FR799589.2	314874	314874	c.2230G>A	p.Ala744Thr
LDBPK_020700	FR799589.2	322608	322608	c.70C>T	p.Arg24Cys
LDBPK_020700	FR799589.2	322641	322641	c.103A>G	p.Asn35Asp
LDBPK_020700	FR799589.2	322645	322645	c.107C>T	p.Thr36Ile
LDBPK_020700	FR799589.2	322837	322837	c.299C>T	p.Ala100Val
LDBPK_020700	FR799589.2	322843	322843	c.305G>A	p.Arg102His
LDBPK_020710	FR799589.2	326221	326221	c.311G>A	p.Arg104Lys
LDBPK_020710	FR799589.2	326713	326713	c.803G>T	p.Arg268Met
LDBPK_020710	FR799589.2	327217	327217	c.1307A>G	p.Lys436Arg
LDBPK_030010	FR799590.1	1424	1424	c.2818G>A	p.Gly940Ser
LDBPK_030010	FR799590.1	1457	1457	c.2785T>C	p.Ser929Pro
LDBPK_030010	FR799590.1	1709	1709	c.2533A>G	p.Ile845Val
LDBPK_030010	FR799590.1	1890	1890	c.2352C>G	p.Asn784Lys
LDBPK_030010	FR799590.1	2606	2606	c.1636T>G	p.Leu546Val
LDBPK_030010	FR799590.1	2755	2755	c.1487C>T	p.Ser496Leu
LDBPK_030010	FR799590.1	3445	3445	c.797C>T	p.Pro266Leu
LDBPK_030010	FR799590.1	3787	3787	c.455C>T	p.Ser152Leu
LDBPK_030010	FR799590.1	4209	4209	c.33T>A	p.His11Gln
LDBPK_030020	FR799590.1	5674	5674	c.152T>G	p.Ile51Arg
LDBPK_030020	FR799590.1	5677	5677	c.155A>G	p.Glu52Gly
LDBPK_030020	FR799590.1	5744	5744	c.222G>C	p.Arg74Ser
LDBPK_030020	FR799590.1	6318	6318	c.796C>G	p.Gln266Glu
LDBPK_030030	FR799590.1	7254	7254	c.196C>A	p.Leu66Ile
LDBPK_030030	FR799590.1	7609	7609	c.551C>T	p.Ala184Val
LDBPK_030030	FR799590.1	8057	8057	c.999G>C	p.Glu333Asp
LDBPK_030030	FR799590.1	8220	8220	c.1162A>G	p.Thr388Ala
LDBPK_030060	FR799590.1	15767	15767	c.400G>C	p.Asp134His
LDBPK_030060	FR799590.1	16017	16017	c.650A>G	p.Asn217Ser
LDBPK_030060	FR799590.1	16679	16679	c.1312G>T	p.Gly438Trp
LDBPK_030060	FR799590.1	16739	16739	c.1372G>A	p.Ala458Thr
LDBPK_030070	FR799590.1	18777	18777	c.182C>T	p.Ala61Val
LDBPK_030070	FR799590.1	20325	20325	c.1730G>A	p.Arg577Lys
LDBPK_030080	FR799590.1	22220	22220	c.482A>G	p.His161Arg
LDBPK_030100	FR799590.1	27937	27937	c.1243G>C	p.Gly415Arg
LDBPK_030100	FR799590.1	28151	28151	c.1457T>C	p.Leu486Pro
LDBPK_030100	FR799590.1	28283	28283	c.1589C>A	p.Thr530Asn
LDBPK_030100	FR799590.1	29284	29284	c.2590T>G	p.Ser864Ala
LDBPK_030110	FR799590.1	30350	30350	c.233T>G	p.Leu78Arg
LDBPK_030110	FR799590.1	31256	31256	c.1139A>C	p.Glu380Ala
LDBPK_030110	FR799590.1	31589	31589	c.1472A>C	p.Glu491Ala
LDBPK_030110	FR799590.1	32444	32444	c.2327A>G	p.Asp776Gly
LDBPK_030130	FR799590.1	35501	35501	c.239G>A	p.Ser80Asn
LDBPK_030130	FR799590.1	35534	35534	c.272C>G	p.Ala91Gly
LDBPK_030140	FR799590.1	37042	37042	c.124A>G	p.Ile42Val
LDBPK_030150	FR799590.1	38958	38958	c.235G>A	p.Glu79Lys
LDBPK_030150	FR799590.1	39276	39276	c.553G>A	p.Ala185Thr
LDBPK_030150	FR799590.1	40059	40059	c.1336A>C	p.Lys446Gln
LDBPK_030150	FR799590.1	40488	40488	c.1765A>T	p.Thr589Ser
LDBPK_030160	FR799590.1	41929	41929	c.49A>C	p.Lys17Gln
LDBPK_030160	FR799590.1	42034	42034	c.154G>C	p.Val52Leu
LDBPK_030160	FR799590.1	42287	42287	c.407G>A	p.Gly136Asp
LDBPK_030170	FR799590.1	43148	43148	c.400T>C	p.Ser134Pro
LDBPK_030170	FR799590.1	43337	43337	c.589T>A	p.Cys197Ser
LDBPK_030170	FR799590.1	43526	43526	c.778C>T	p.Arg260Cys
LDBPK_030170	FR799590.1	43698	43698	c.950G>A	p.Gly317Asp
LDBPK_030170	FR799590.1	43917	43917	c.1169G>A	p.Arg390His
LDBPK_030190	FR799590.1	48244	48244	c.219C>G	p.His73Gln
LDBPK_030190	FR799590.1	48420	48420	c.395C>T	p.Ala132Val
LDBPK_030210	FR799590.1	54109	54109	c.385C>A	p.Leu129Met
LDBPK_030220	FR799590.1	55700	55700	c.92A>G	p.Glu31Gly
LDBPK_030220	FR799590.1	55784	55784	c.176A>G	p.Lys59Arg
LDBPK_030220	FR799590.1	55984	55984	c.376G>T	p.Ala126Ser
LDBPK_030220	FR799590.1	56028	56028	c.420C>A	p.His140Gln
LDBPK_030220	FR799590.1	56230	56230	c.622G>A	p.Val208Met
LDBPK_030220	FR799590.1	57678	57678	c.2070C>A	p.Asn690Lys
LDBPK_030220	FR799590.1	57684	57684	c.2076C>A	p.Asn692Lys
LDBPK_030250	FR799590.1	63891	63891	c.359G>A	p.Gly120Asp
LDBPK_030250	FR799590.1	64113	64113	c.581G>A	p.Arg194Gln
LDBPK_030250	FR799590.1	64397	64397	c.865A>G	p.Ser289Gly
LDBPK_030270	FR799590.1	73326	73326	c.398T>C	p.Val133Ala
LDBPK_030280	FR799590.1	76760	76760	c.35G>C	p.Gly12Ala
LDBPK_030290	FR799590.1	83623	83623	c.1313C>T	p.Ser438Leu
LDBPK_030290	FR799590.1	84138	84138	c.1828G>A	p.Ala610Thr
LDBPK_030290	FR799590.1	84708	84708	c.2398G>A	p.Ala800Thr
LDBPK_030290	FR799590.1	85264	85264	c.2954G>A	p.Arg985His
LDBPK_030290	FR799590.1	85603	85603	c.3293T>G	p.Met1098Arg
LDBPK_030290	FR799590.1	85773	85773	c.3463G>A	p.Ala1155Thr
LDBPK_030290	FR799590.1	87954	87954	c.5644G>A	p.Gly1882Ser
LDBPK_030300	FR799590.1	90621	90621	c.1061G>A	p.Arg354Gln
LDBPK_030300	FR799590.1	92051	92051	c.2491G>A	p.Ala831Thr
LDBPK_030310	FR799590.1	94462	94462	c.568A>G	p.Thr190Ala
LDBPK_030320	FR799590.1	96852	96852	c.197G>A	p.Gly66Asp
LDBPK_030320	FR799590.1	97289	97289	c.634A>T	p.Ile212Phe
LDBPK_030320	FR799590.1	97365	97365	c.710G>A	p.Gly237Asp
LDBPK_030330	FR799590.1	99081	99081	c.65G>A	p.Arg22Gln
LDBPK_030330	FR799590.1	99254	99254	c.238C>G	p.Arg80Gly
LDBPK_030330	FR799590.1	99480	99480	c.464C>T	p.Pro155Leu
LDBPK_030330	FR799590.1	99516	99516	c.500G>A	p.Arg167His
LDBPK_030330	FR799590.1	99735	99735	c.719C>T	p.Ser240Leu
LDBPK_030330	FR799590.1	100823	100823	c.1807C>G	p.Arg603Gly
LDBPK_030330	FR799590.1	101522	101522	c.2506A>G	p.Met836Val
LDBPK_030330	FR799590.1	102191	102191	c.3175T>C	p.Trp1059Arg
LDBPK_030330	FR799590.1	102503	102503	c.3487G>A	p.Val1163Ile
LDBPK_030330	FR799590.1	103137	103137	c.4121T>C	p.Val1374Ala
LDBPK_030340	FR799590.1	107840	107840	c.332A>C	p.Tyr111Ser
LDBPK_030340	FR799590.1	107929	107929	c.421T>C	p.Cys141Arg
LDBPK_030340	FR799590.1	108127	108127	c.619T>G	p.Tyr207Asp
LDBPK_030340	FR799590.1	108137	108137	c.629C>T	p.Thr210Ile
LDBPK_030340	FR799590.1	108335	108335	c.827T>C	p.Leu276Pro
LDBPK_030340	FR799590.1	108692	108692	c.1184T>A	p.Leu395His
LDBPK_030340	FR799590.1	108730	108730	c.1222C>T	p.Pro408Ser
LDBPK_030340	FR799590.1	108928	108928	c.1420G>A	p.Val474Met
LDBPK_030340	FR799590.1	109588	109588	c.2080G>A	p.Gly694Arg
LDBPK_030340	FR799590.1	109598	109598	c.2090T>C	p.Leu697Pro
LDBPK_030340	FR799590.1	109843	109843	c.2335A>G	p.Thr779Ala
LDBPK_030340	FR799590.1	111241	111241	c.3733T>A	p.Cys1245Ser
LDBPK_030340	FR799590.1	111337	111337	c.3829T>G	p.Ser1277Ala
LDBPK_030350	FR799590.1	116213	116213	c.109C>G	p.Arg37Gly
LDBPK_030350	FR799590.1	116581	116581	c.477G>A	p.Met159Ile
LDBPK_030350	FR799590.1	116824	116824	c.720G>A	p.Met240Ile
LDBPK_030360	FR799590.1	119793	119793	c.344A>G	p.Tyr115Cys
LDBPK_030370	FR799590.1	125042	125042	c.464A>T	p.Asp155Val
LDBPK_030370	FR799590.1	125105	125105	c.527G>C	p.Cys176Ser
LDBPK_030370	FR799590.1	125107	125107	c.529G>C	p.Val177Leu
LDBPK_030370	FR799590.1	125254	125254	c.676G>A	p.Glu226Lys
LDBPK_030370	FR799590.1	125552	125552	c.974C>T	p.Ser325Phe
LDBPK_030380	FR799590.1	126976	126976	c.838C>A	p.Leu280Ile
LDBPK_030400	FR799590.1	135566	135566	c.262G>A	p.Asp88Asn
LDBPK_030400	FR799590.1	136005	136005	c.701A>G	p.Glu234Gly
LDBPK_030400	FR799590.1	138075	138075	c.2771C>T	p.Ala924Val
LDBPK_030400	FR799590.1	138321	138321	c.3017A>C	p.Asp1006Ala
LDBPK_030400	FR799590.1	139130	139130	c.3826A>G	p.Met1276Val
LDBPK_030400	FR799590.1	139462	139462	c.4158A>G	p.Ile1386Met
LDBPK_030400	FR799590.1	139730	139730	c.4426C>T	p.Arg1476Cys
LDBPK_030400	FR799590.1	140282	140282	c.4978G>C	p.Val1660Leu
LDBPK_030420	FR799590.1	142739	142739	c.169A>G	p.Thr57Ala
LDBPK_030430	FR799590.1	145250	145250	c.1319C>A	p.Ala440Asp
LDBPK_030430	FR799590.1	146023	146023	c.2092G>A	p.Gly698Arg
LDBPK_030430	FR799590.1	146371	146371	c.2440G>T	p.Ala814Ser
LDBPK_030430	FR799590.1	146389	146389	c.2458A>G	p.Thr820Ala
LDBPK_030430	FR799590.1	147209	147209	c.3278C>T	p.Pro1093Leu
LDBPK_030430	FR799590.1	147214	147214	c.3283T>G	p.Ser1095Ala
LDBPK_030430	FR799590.1	147340	147340	c.3409T>G	p.Ser1137Ala
LDBPK_030440	FR799590.1	155557	155557	c.283G>A	p.Ala95Thr
LDBPK_030440	FR799590.1	156766	156766	c.1492A>G	p.Arg498Gly
LDBPK_030440	FR799590.1	158284	158284	c.3010G>C	p.Gly1004Arg
LDBPK_030450	FR799590.1	163306	163306	c.4T>G	p.Ser2Ala
LDBPK_030450	FR799590.1	163357	163357	c.55C>T	p.Pro19Ser
LDBPK_030450	FR799590.1	163424	163424	c.122G>T	p.Cys41Phe
LDBPK_030450	FR799590.1	164630	164630	c.1328C>T	p.Ala443Val
LDBPK_030450	FR799590.1	166021	166021	c.2719C>T	p.His907Tyr
LDBPK_030460	FR799590.1	167993	167993	c.295G>T	p.Gly99Cys
LDBPK_030460	FR799590.1	168933	168933	c.1235A>G	p.Asn412Ser
LDBPK_030460	FR799590.1	169991	169991	c.2293G>A	p.Ala765Thr
LDBPK_030470	FR799590.1	172615	172615	c.124A>C	p.Ser42Arg
LDBPK_030470	FR799590.1	172634	172634	c.143C>T	p.Thr48Ile
LDBPK_030470	FR799590.1	172904	172904	c.413A>G	p.Asp138Gly
LDBPK_030470	FR799590.1	174253	174253	c.1762A>G	p.Met588Val
LDBPK_030470	FR799590.1	174955	174955	c.2464T>G	p.Ser822Ala
LDBPK_030470	FR799590.1	175510	175510	c.3019A>G	p.Thr1007Ala
LDBPK_030480	FR799590.1	178577	178577	c.1670T>G	p.Phe557Cys
LDBPK_030490	FR799590.1	183706	183706	c.2356A>C	p.Met786Leu
LDBPK_030490	FR799590.1	184210	184210	c.2860A>C	p.Thr954Pro
LDBPK_030490	FR799590.1	185961	185961	c.4611G>C	p.Gln1537His
LDBPK_030490	FR799590.1	186488	186488	c.5138A>G	p.Asp1713Gly
LDBPK_030490	FR799590.1	188002	188002	c.6652T>G	p.Tyr2218Asp
LDBPK_030490	FR799590.1	188173	188173	c.6823G>C	p.Val2275Leu
LDBPK_030490	FR799590.1	189041	189041	c.7691G>C	p.Gly2564Ala
LDBPK_030490	FR799590.1	189191	189191	c.7841G>A	p.Arg2614Gln
LDBPK_030500	FR799590.1	190566	190566	c.806C>T	p.Pro269Leu
LDBPK_030500	FR799590.1	190591	190591	c.831T>G	p.Asp277Glu
LDBPK_030500	FR799590.1	190698	190698	c.938A>G	p.Asn313Ser
LDBPK_030500	FR799590.1	191564	191564	c.1804G>A	p.Val602Ile
LDBPK_030510	FR799590.1	194266	194266	c.116T>C	p.Ile39Thr
LDBPK_030510	FR799590.1	194370	194370	c.220C>T	p.His74Tyr
LDBPK_030510	FR799590.1	195105	195105	c.955A>G	p.Asn319Asp
LDBPK_030510	FR799590.1	195814	195814	c.1664C>T	p.Ala555Val
LDBPK_030510	FR799590.1	196881	196881	c.2731G>A	p.Ala911Thr
LDBPK_030510	FR799590.1	197419	197419	c.3269A>G	p.Lys1090Arg
LDBPK_030510	FR799590.1	197421	197421	c.3271A>G	p.Arg1091Gly
LDBPK_030510	FR799590.1	199018	199018	c.4868T>G	p.Ile1623Ser
LDBPK_030510	FR799590.1	199536	199536	c.5386C>G	p.Gln1796Glu
LDBPK_030510	FR799590.1	199812	199812	c.5662A>G	p.Ser1888Gly
LDBPK_030510	FR799590.1	200187	200187	c.6037A>G	p.Thr2013Ala
LDBPK_030530	FR799590.1	204698	204698	c.37C>A	p.Pro13Thr
LDBPK_030530	FR799590.1	204915	204915	c.254C>T	p.Ser85Phe
LDBPK_030530	FR799590.1	205280	205280	c.619G>A	p.Gly207Ser
LDBPK_030530	FR799590.1	206261	206261	c.1600T>G	p.Ser534Ala
LDBPK_030530	FR799590.1	207002	207002	c.2341A>G	p.Lys781Glu
LDBPK_030530	FR799590.1	207248	207248	c.2587G>A	p.Ala863Thr
LDBPK_030530	FR799590.1	207677	207677	c.3016G>A	p.Ala1006Thr
LDBPK_030530	FR799590.1	207705	207705	c.3044A>G	p.Asp1015Gly
LDBPK_030550	FR799590.1	215934	215934	c.593T>C	p.Val198Ala
LDBPK_030550	FR799590.1	216165	216165	c.824T>C	p.Met275Thr
LDBPK_030560	FR799590.1	217304	217304	c.488C>T	p.Ala163Val
LDBPK_030570	FR799590.1	219374	219374	c.155T>C	p.Leu52Pro
LDBPK_030570	FR799590.1	219989	219989	c.770A>G	p.His257Arg
LDBPK_030570	FR799590.1	220803	220803	c.1584G>C	p.Gln528His
LDBPK_030570	FR799590.1	220955	220955	c.1736C>G	p.Ala579Gly
LDBPK_030570	FR799590.1	221125	221125	c.1906T>C	p.Phe636Leu
LDBPK_030570	FR799590.1	221408	221408	c.2189C>T	p.Thr730Ile
LDBPK_030570	FR799590.1	221524	221524	c.2305A>G	p.Lys769Glu
LDBPK_030570	FR799590.1	222032	222032	c.2813T>G	p.Val938Gly
LDBPK_030570	FR799590.1	222038	222038	c.2819T>G	p.Phe940Cys
LDBPK_030570	FR799590.1	222065	222065	c.2846G>C	p.Gly949Ala
LDBPK_030570	FR799590.1	222143	222143	c.2924C>T	p.Ala975Val
LDBPK_030590	FR799590.1	227023	227023	c.115C>G	p.Pro39Ala
LDBPK_030600	FR799590.1	229623	229623	c.806G>A	p.Arg269Lys
LDBPK_030600	FR799590.1	230238	230238	c.1421G>A	p.Gly474Glu
LDBPK_030610	FR799590.1	233405	233405	c.948C>A	p.Asp316Glu
LDBPK_030620	FR799590.1	234393	234393	c.217T>C	p.Ser73Pro
LDBPK_030620	FR799590.1	235688	235688	c.1512G>C	p.Glu504Asp
LDBPK_030630	FR799590.1	238908	238908	c.472T>A	p.Phe158Ile
LDBPK_030630	FR799590.1	238980	238980	c.544C>T	p.Leu182Phe
LDBPK_030630	FR799590.1	239112	239112	c.676G>A	p.Gly226Arg
LDBPK_030630	FR799590.1	239241	239241	c.805A>G	p.Ser269Gly
LDBPK_030630	FR799590.1	240346	240346	c.1910G>A	p.Arg637Gln
LDBPK_030630	FR799590.1	240961	240961	c.2525T>C	p.Leu842Pro
LDBPK_030630	FR799590.1	241093	241093	c.2657C>T	p.Pro886Leu
LDBPK_030640	FR799590.1	242792	242792	c.103C>T	p.Arg35Trp
LDBPK_030640	FR799590.1	242831	242831	c.142A>G	p.Ser48Gly
LDBPK_030640	FR799590.1	242987	242987	c.298C>T	p.Leu100Phe
LDBPK_030640	FR799590.1	243350	243350	c.661T>C	p.Cys221Arg
LDBPK_030640	FR799590.1	243656	243656	c.967A>C	p.Met323Leu
LDBPK_030640	FR799590.1	244054	244054	c.1365T>G	p.Asp455Glu
LDBPK_030640	FR799590.1	244289	244289	c.1600A>G	p.Ile534Val
LDBPK_030640	FR799590.1	244296	244296	c.1607C>T	p.Ala536Val
LDBPK_030650	FR799590.1	247652	247652	c.1567A>G	p.Thr523Ala
LDBPK_030660	FR799590.1	258773	258773	c.281C>T	p.Pro94Leu
LDBPK_030670	FR799590.1	262751	262751	c.5857G>T	p.Ala1953Ser
LDBPK_030670	FR799590.1	265043	265043	c.3565C>A	p.Leu1189Met
LDBPK_030670	FR799590.1	267398	267398	c.1210G>A	p.Gly404Ser
LDBPK_030670	FR799590.1	267539	267539	c.1069A>G	p.Asn357Asp
LDBPK_030680	FR799590.1	269639	269639	c.8449A>G	p.Thr2817Ala
LDBPK_030680	FR799590.1	270866	270866	c.7222C>T	p.Arg2408Cys
LDBPK_030680	FR799590.1	270986	270986	c.7102C>T	p.Pro2368Ser
LDBPK_030680	FR799590.1	271886	271886	c.6202G>T	p.Val2068Phe
LDBPK_030680	FR799590.1	273142	273142	c.4946G>A	p.Ser1649Asn
LDBPK_030680	FR799590.1	273515	273515	c.4573A>G	p.Ser1525Gly
LDBPK_030680	FR799590.1	273526	273526	c.4562C>T	p.Thr1521Met
LDBPK_030680	FR799590.1	274570	274570	c.3518A>G	p.Asp1173Gly
LDBPK_030680	FR799590.1	275279	275279	c.2809A>G	p.Thr937Ala
LDBPK_030680	FR799590.1	275297	275297	c.2791C>T	p.Arg931Cys
LDBPK_030680	FR799590.1	277282	277282	c.806C>T	p.Pro269Leu
LDBPK_030680	FR799590.1	277364	277364	c.724T>C	p.Ser242Pro
LDBPK_030680	FR799590.1	277751	277751	c.337A>G	p.Thr113Ala
LDBPK_030690	FR799590.1	279064	279064	c.619C>A	p.Gln207Lys
LDBPK_030690	FR799590.1	279352	279352	c.331G>T	p.Ala111Ser
LDBPK_030690	FR799590.1	279664	279664	c.19C>T	p.His7Tyr
LDBPK_030700	FR799590.1	280313	280313	c.3251T>C	p.Met1084Thr
LDBPK_030700	FR799590.1	280317	280317	c.3247G>A	p.Ala1083Thr
LDBPK_030700	FR799590.1	281019	281019	c.2545G>C	p.Asp849His
LDBPK_030700	FR799590.1	281366	281366	c.2198C>T	p.Ser733Phe
LDBPK_030710	FR799590.1	285616	285616	c.592A>G	p.Lys198Glu
LDBPK_030710	FR799590.1	285700	285700	c.508A>G	p.Thr170Ala
LDBPK_030710	FR799590.1	285778	285778	c.430T>G	p.Ser144Ala
LDBPK_030730	FR799590.1	288193	288193	c.2063C>T	p.Ala688Val
LDBPK_030730	FR799590.1	288433	288433	c.1823C>T	p.Ser608Leu
LDBPK_030730	FR799590.1	288467	288467	c.1789A>G	p.Ser597Gly
LDBPK_030730	FR799590.1	289273	289273	c.983G>T	p.Arg328Leu
LDBPK_030730	FR799590.1	289372	289372	c.884G>A	p.Arg295His
LDBPK_030740	FR799590.1	291983	291983	c.500C>A	p.Pro167His
LDBPK_030750	FR799590.1	294169	294169	c.1202G>C	p.Gly401Ala
LDBPK_030750	FR799590.1	294206	294206	c.1165A>G	p.Met389Val
LDBPK_030750	FR799590.1	295355	295355	c.16C>T	p.Pro6Ser
LDBPK_030760	FR799590.1	296443	296443	c.9187G>T	p.Val3063Leu
LDBPK_030760	FR799590.1	296584	296584	c.9046G>A	p.Ala3016Thr
LDBPK_030760	FR799590.1	296728	296728	c.8902G>A	p.Gly2968Arg
LDBPK_030760	FR799590.1	296935	296935	c.8695C>G	p.Pro2899Ala
LDBPK_030760	FR799590.1	297126	297126	c.8504C>T	p.Ala2835Val
LDBPK_030760	FR799590.1	297315	297315	c.8315A>G	p.His2772Arg
LDBPK_030760	FR799590.1	297325	297325	c.8305A>G	p.Asn2769Asp
LDBPK_030760	FR799590.1	297511	297511	c.8119G>T	p.Gly2707Cys
LDBPK_030760	FR799590.1	297552	297552	c.8078C>T	p.Thr2693Ile
LDBPK_030760	FR799590.1	298080	298080	c.7550T>C	p.Val2517Ala
LDBPK_030760	FR799590.1	298694	298694	c.6936T>G	p.Ile2312Met
LDBPK_030760	FR799590.1	298887	298887	c.6743C>T	p.Pro2248Leu
LDBPK_030760	FR799590.1	298990	298990	c.6640A>G	p.Ser2214Gly
LDBPK_030760	FR799590.1	299331	299331	c.6299C>T	p.Ala2100Val
LDBPK_030760	FR799590.1	299970	299970	c.5660C>A	p.Pro1887Gln
LDBPK_030760	FR799590.1	300082	300082	c.5548G>A	p.Val1850Ile
LDBPK_030760	FR799590.1	300784	300784	c.4846A>G	p.Thr1616Ala
LDBPK_030760	FR799590.1	300889	300889	c.4741T>C	p.Phe1581Leu
LDBPK_030760	FR799590.1	300938	300938	c.4692G>T	p.Met1564Ile
LDBPK_030760	FR799590.1	302657	302657	c.2973C>G	p.Asp991Glu
LDBPK_030760	FR799590.1	302971	302971	c.2659G>A	p.Ala887Thr
LDBPK_030760	FR799590.1	303361	303361	c.2269C>T	p.Arg757Cys
LDBPK_030760	FR799590.1	303660	303660	c.1970C>G	p.Ala657Gly
LDBPK_030760	FR799590.1	303663	303663	c.1967T>C	p.Val656Ala
LDBPK_030760	FR799590.1	304026	304026	c.1604C>T	p.Thr535Met
LDBPK_030760	FR799590.1	304339	304339	c.1291C>T	p.Arg431Cys
LDBPK_030760	FR799590.1	304492	304492	c.1138A>T	p.Ser380Cys
LDBPK_030780	FR799590.1	308162	308162	c.310A>G	p.Thr104Ala
LDBPK_030790	FR799590.1	309483	309483	c.7031C>A	p.Thr2344Lys
LDBPK_030790	FR799590.1	310275	310275	c.6239G>A	p.Gly2080Asp
LDBPK_030790	FR799590.1	311659	311659	c.4855C>A	p.Leu1619Ile
LDBPK_030790	FR799590.1	312439	312439	c.4075G>A	p.Asp1359Asn
LDBPK_030790	FR799590.1	313962	313962	c.2552C>T	p.Thr851Met
LDBPK_030790	FR799590.1	316168	316168	c.346G>A	p.Ala116Thr
LDBPK_030800	FR799590.1	318264	318264	c.2825A>G	p.Asn942Ser
LDBPK_030800	FR799590.1	318472	318472	c.2617G>A	p.Glu873Lys
LDBPK_030800	FR799590.1	318696	318696	c.2393T>G	p.Phe798Cys
LDBPK_030800	FR799590.1	318697	318697	c.2392T>G	p.Phe798Val
LDBPK_030800	FR799590.1	318763	318763	c.2326G>A	p.Gly776Arg
LDBPK_030800	FR799590.1	319618	319618	c.1471C>A	p.His491Asn
LDBPK_030800	FR799590.1	320344	320344	c.745G>T	p.Ala249Ser
LDBPK_030810	FR799590.1	322398	322398	c.8191A>G	p.Thr2731Ala
LDBPK_030810	FR799590.1	322808	322808	c.7781A>G	p.His2594Arg
LDBPK_030810	FR799590.1	323069	323069	c.7520G>A	p.Arg2507His
LDBPK_030810	FR799590.1	323627	323627	c.6962C>T	p.Pro2321Leu
LDBPK_030810	FR799590.1	324233	324233	c.6356G>A	p.Arg2119Gln
LDBPK_030810	FR799590.1	324576	324576	c.6013C>G	p.Pro2005Ala
LDBPK_030810	FR799590.1	324720	324720	c.5869A>G	p.Thr1957Ala
LDBPK_030810	FR799590.1	325728	325728	c.4861C>T	p.Arg1621Cys
LDBPK_030810	FR799590.1	325806	325806	c.4783G>A	p.Ala1595Thr
LDBPK_030810	FR799590.1	325959	325959	c.4630C>T	p.Pro1544Ser
LDBPK_030810	FR799590.1	326195	326195	c.4394C>A	p.Ala1465Glu
LDBPK_030810	FR799590.1	326619	326619	c.3970G>A	p.Val1324Ile
LDBPK_030810	FR799590.1	326766	326766	c.3823T>C	p.Phe1275Leu
LDBPK_030810	FR799590.1	326892	326892	c.3697C>A	p.Pro1233Thr
LDBPK_030810	FR799590.1	327846	327846	c.2743T>C	p.Ser915Pro
LDBPK_030810	FR799590.1	328116	328116	c.2473A>G	p.Thr825Ala
LDBPK_030810	FR799590.1	328199	328199	c.2390C>A	p.Ala797Glu
LDBPK_030810	FR799590.1	328299	328299	c.2290G>A	p.Val764Met
LDBPK_030810	FR799590.1	328475	328475	c.2114G>A	p.Gly705Asp
LDBPK_030810	FR799590.1	328934	328934	c.1655A>G	p.His552Arg
LDBPK_030810	FR799590.1	330057	330057	c.532G>A	p.Ala178Thr
LDBPK_030810	FR799590.1	330342	330342	c.247G>A	p.Ala83Thr
LDBPK_030810	FR799590.1	330543	330543	c.46A>G	p.Thr16Ala
LDBPK_030970	FR799590.1	332535	332535	c.682G>A	p.Asp228Asn
LDBPK_030970	FR799590.1	332970	332970	c.247C>T	p.Arg83Cys
LDBPK_030970	FR799590.1	333184	333184	c.33G>T	p.Glu11Asp
LDBPK_013360	FR799590.1	339259	339259	c.1543G>A	p.Gly515Ser
LDBPK_013360	FR799590.1	339307	339307	c.1495A>G	p.Ile499Val
LDBPK_013360	FR799590.1	339447	339447	c.1355C>T	p.Ala452Val
LDBPK_013360	FR799590.1	340231	340231	c.571G>A	p.Ala191Thr
LDBPK_030830	FR799590.1	342310	342310	c.6311C>G	p.Pro2104Arg
LDBPK_030830	FR799590.1	342371	342371	c.6250C>T	p.Pro2084Ser
LDBPK_030830	FR799590.1	344707	344707	c.3914C>A	p.Ala1305Glu
LDBPK_030830	FR799590.1	344710	344710	c.3911A>G	p.His1304Arg
LDBPK_030830	FR799590.1	346036	346036	c.2585A>G	p.Gln862Arg
LDBPK_030830	FR799590.1	346135	346135	c.2486A>C	p.Glu829Ala
LDBPK_030830	FR799590.1	347863	347863	c.758T>C	p.Val253Ala
LDBPK_030830	FR799590.1	347933	347933	c.688C>G	p.Arg230Gly
LDBPK_030830	FR799590.1	348090	348090	c.531T>G	p.His177Gln
LDBPK_030840	FR799590.1	349900	349900	c.4370C>T	p.Thr1457Ile
LDBPK_030840	FR799590.1	349946	349946	c.4324G>A	p.Ala1442Thr
LDBPK_030840	FR799590.1	349961	349961	c.4309T>C	p.Ser1437Pro
LDBPK_030840	FR799590.1	352528	352528	c.1742T>G	p.Val581Gly
LDBPK_030840	FR799590.1	354256	354256	c.14G>A	p.Arg5Gln
LDBPK_030850	FR799590.1	355205	355205	c.2615G>A	p.Arg872Gln
LDBPK_030850	FR799590.1	355395	355395	c.2425G>A	p.Asp809Asn
LDBPK_030850	FR799590.1	355527	355527	c.2293T>C	p.Ser765Pro
LDBPK_030850	FR799590.1	355592	355592	c.2228C>A	p.Ala743Glu
LDBPK_030860	FR799590.1	360517	360517	c.5767G>T	p.Ala1923Ser
LDBPK_030860	FR799590.1	360816	360816	c.5468A>G	p.Asp1823Gly
LDBPK_030860	FR799590.1	362014	362014	c.4270G>A	p.Glu1424Lys
LDBPK_030860	FR799590.1	362386	362386	c.3898T>G	p.Leu1300Val
LDBPK_030860	FR799590.1	363919	363919	c.2365T>G	p.Tyr789Asp
LDBPK_030860	FR799590.1	364357	364357	c.1927G>A	p.Val643Met
LDBPK_030860	FR799590.1	364588	364588	c.1696A>G	p.Thr566Ala
LDBPK_030860	FR799590.1	365112	365112	c.1172A>T	p.Lys391Met
LDBPK_030860	FR799590.1	365790	365790	c.494T>G	p.Leu165Arg
LDBPK_030870	FR799590.1	367764	367764	c.1498C>A	p.Arg500Ser
LDBPK_030870	FR799590.1	368901	368901	c.361A>G	p.Thr121Ala
LDBPK_030870	FR799590.1	369023	369023	c.239C>T	p.Ala80Val
LDBPK_030880	FR799590.1	371316	371316	c.1127G>C	p.Gly376Ala
LDBPK_030880	FR799590.1	371455	371455	c.988C>T	p.Arg330Cys
LDBPK_030880	FR799590.1	372432	372432	c.11C>T	p.Thr4Ile
LDBPK_030890	FR799590.1	374155	374155	c.133C>A	p.Leu45Ile
LDBPK_030910	FR799590.1	377354	377354	c.1577G>A	p.Gly526Asp
LDBPK_030920	FR799590.1	379637	379637	c.878A>C	p.Glu293Ala
LDBPK_030950	FR799590.1	385564	385564	c.803A>G	p.Tyr268Cys
LDBPK_030950	FR799590.1	385862	385862	c.505G>A	p.Val169Ile
LDBPK_030950	FR799590.1	385897	385897	c.470A>C	p.Asn157Thr
LDBPK_030950	FR799590.1	385921	385921	c.446A>G	p.Lys149Arg
LDBPK_040010	FR799591.2	8255	8255	c.58A>T	p.Thr20Ser
LDBPK_040010	FR799591.2	10925	10925	c.2728C>A	p.Leu910Ile
LDBPK_040010	FR799591.2	11142	11142	c.2945T>C	p.Met982Thr
LDBPK_040010	FR799591.2	11240	11240	c.3043C>T	p.Pro1015Ser
LDBPK_040030	FR799591.2	16501	16501	c.216C>A	p.Ser72Arg
LDBPK_040030	FR799591.2	17444	17444	c.1159G>A	p.Gly387Ser
LDBPK_040030	FR799591.2	17604	17604	c.1319C>T	p.Ala440Val
LDBPK_040030	FR799591.2	17934	17934	c.1649C>T	p.Ala550Val
LDBPK_040060	FR799591.2	27650	27650	c.472T>C	p.Ser158Pro
LDBPK_040070	FR799591.2	31484	31484	c.605G>A	p.Ser202Asn
LDBPK_040100	FR799591.2	37618	37618	c.2005A>G	p.Thr669Ala
LDBPK_040100	FR799591.2	38610	38610	c.2997G>A	p.Met999Ile
LDBPK_040100	FR799591.2	39814	39814	c.4201G>C	p.Ala1401Pro
LDBPK_040100	FR799591.2	40754	40754	c.5141G>T	p.Gly1714Val
LDBPK_040110	FR799591.2	43452	43452	c.197G>A	p.Arg66His
LDBPK_040110	FR799591.2	43584	43584	c.329C>T	p.Ala110Val
LDBPK_040110	FR799591.2	44100	44100	c.845C>A	p.Ala282Glu
LDBPK_040140	FR799591.2	49894	49894	c.127G>A	p.Ala43Thr
LDBPK_040150	FR799591.2	51297	51297	c.92C>T	p.Thr31Met
LDBPK_040150	FR799591.2	51362	51362	c.157A>G	p.Lys53Glu
LDBPK_040150	FR799591.2	51634	51634	c.429G>T	p.Arg143Ser
LDBPK_040150	FR799591.2	51760	51760	c.555G>T	p.Lys185Asn
LDBPK_040150	FR799591.2	51920	51920	c.715G>A	p.Gly239Ser
LDBPK_040150	FR799591.2	52329	52329	c.1124A>G	p.Asn375Ser
LDBPK_040150	FR799591.2	52421	52421	c.1216G>A	p.Val406Ile
LDBPK_040160	FR799591.2	53655	53655	c.650G>A	p.Arg217His
LDBPK_040160	FR799591.2	54185	54185	c.1180A>G	p.Thr394Ala
LDBPK_040160	FR799591.2	54212	54212	c.1207C>A	p.His403Asn
LDBPK_040190	FR799591.2	64366	64366	c.392A>G	p.Asn131Ser
LDBPK_040210	FR799591.2	70893	70893	c.442A>G	p.Ser148Gly
LDBPK_040210	FR799591.2	70938	70938	c.487G>A	p.Gly163Ser
LDBPK_040220	FR799591.2	73876	73876	c.533A>G	p.Asn178Ser
LDBPK_040240	FR799591.2	79052	79052	c.674G>A	p.Arg225Gln
LDBPK_040240	FR799591.2	80284	80284	c.1906G>T	p.Ala636Ser
LDBPK_040240	FR799591.2	81512	81512	c.3134C>T	p.Pro1045Leu
LDBPK_040250	FR799591.2	84250	84250	c.799T>C	p.Phe267Leu
LDBPK_040270	FR799591.2	88066	88066	c.838G>A	p.Gly280Ser
LDBPK_040270	FR799591.2	91208	91208	c.3980A>G	p.Gln1327Arg
LDBPK_040270	FR799591.2	91249	91249	c.4021C>A	p.His1341Asn
LDBPK_040270	FR799591.2	91428	91428	c.4200G>T	p.Gln1400His
LDBPK_040270	FR799591.2	91891	91891	c.4663G>A	p.Gly1555Ser
LDBPK_040270	FR799591.2	91987	91987	c.4759G>A	p.Gly1587Ser
LDBPK_040300	FR799591.2	98733	98733	c.53T>C	p.Val18Ala
LDBPK_040300	FR799591.2	99563	99563	c.883G>A	p.Ala295Thr
LDBPK_040310	FR799591.2	102586	102586	c.5C>T	p.Thr2Ile
LDBPK_040320	FR799591.2	105526	105526	c.7T>C	p.Trp3Arg
LDBPK_040320	FR799591.2	105530	105530	c.11G>A	p.Arg4Gln
LDBPK_040320	FR799591.2	105598	105598	c.79G>A	p.Ala27Thr
LDBPK_040320	FR799591.2	106567	106567	c.1048A>G	p.Ile350Val
LDBPK_040320	FR799591.2	106742	106742	c.1223G>A	p.Gly408Glu
LDBPK_040330	FR799591.2	109186	109186	c.467G>A	p.Arg156Lys
LDBPK_040340	FR799591.2	111281	111281	c.26C>T	p.Ser9Leu
LDBPK_040340	FR799591.2	111671	111671	c.416T>C	p.Val139Ala
LDBPK_040340	FR799591.2	112210	112210	c.955G>A	p.Ala319Thr
LDBPK_040340	FR799591.2	113230	113230	c.1975G>A	p.Gly659Ser
LDBPK_040340	FR799591.2	113786	113786	c.2531T>G	p.Val844Gly
LDBPK_040340	FR799591.2	113852	113852	c.2597A>G	p.His866Arg
LDBPK_040340	FR799591.2	113945	113945	c.2690A>G	p.Asp897Gly
LDBPK_040340	FR799591.2	113965	113965	c.2710G>A	p.Ala904Thr
LDBPK_040340	FR799591.2	114399	114399	c.3144T>G	p.Phe1048Leu
LDBPK_040340	FR799591.2	114608	114608	c.3353A>G	p.Asn1118Ser
LDBPK_040340	FR799591.2	116608	116608	c.5353C>G	p.Pro1785Ala
LDBPK_040340	FR799591.2	116707	116707	c.5452C>G	p.Pro1818Ala
LDBPK_040370	FR799591.2	132895	132895	c.293T>C	p.Met98Thr
LDBPK_040380	FR799591.2	137062	137062	c.947A>G	p.Asp316Gly
LDBPK_040390	FR799591.2	139876	139876	c.2989G>A	p.Ala997Thr
LDBPK_040390	FR799591.2	141340	141340	c.1525C>T	p.Pro509Ser
LDBPK_040390	FR799591.2	142111	142111	c.754G>A	p.Ala252Thr
LDBPK_040400	FR799591.2	145198	145198	c.1081G>C	p.Ala361Pro
LDBPK_040410	FR799591.2	148497	148497	c.11454G>A	p.Met3818Ile
LDBPK_040410	FR799591.2	150880	150880	c.9071C>A	p.Ala3024Asp
LDBPK_040410	FR799591.2	151327	151327	c.8624G>A	p.Gly2875Glu
LDBPK_040410	FR799591.2	151733	151733	c.8218T>C	p.Cys2740Arg
LDBPK_040410	FR799591.2	151798	151798	c.8153A>G	p.Asp2718Gly
LDBPK_040410	FR799591.2	152516	152516	c.7435G>C	p.Val2479Leu
LDBPK_040410	FR799591.2	152524	152524	c.7427A>G	p.Asp2476Gly
LDBPK_040410	FR799591.2	153857	153857	c.6094G>A	p.Val2032Met
LDBPK_040410	FR799591.2	154609	154609	c.5342G>A	p.Arg1781His
LDBPK_040410	FR799591.2	155437	155437	c.4514G>A	p.Ser1505Asn
LDBPK_040410	FR799591.2	155822	155822	c.4129C>T	p.Leu1377Phe
LDBPK_040410	FR799591.2	156324	156324	c.3627C>A	p.Ser1209Arg
LDBPK_040410	FR799591.2	156329	156329	c.3622A>G	p.Ile1208Val
LDBPK_040410	FR799591.2	156638	156638	c.3313A>G	p.Arg1105Gly
LDBPK_040410	FR799591.2	156728	156728	c.3223A>G	p.Met1075Val
LDBPK_040410	FR799591.2	157838	157838	c.2113G>T	p.Gly705Cys
LDBPK_040410	FR799591.2	158015	158015	c.1936A>G	p.Thr646Ala
LDBPK_040410	FR799591.2	158045	158045	c.1906G>A	p.Ala636Thr
LDBPK_040410	FR799591.2	158051	158051	c.1900A>G	p.Thr634Ala
LDBPK_040410	FR799591.2	158189	158189	c.1762C>T	p.Pro588Ser
LDBPK_040410	FR799591.2	158356	158356	c.1595G>A	p.Ser532Asn
LDBPK_040410	FR799591.2	158453	158453	c.1498G>A	p.Ala500Thr
LDBPK_040410	FR799591.2	159092	159092	c.859A>T	p.Thr287Ser
LDBPK_040420	FR799591.2	165035	165035	c.1891A>C	p.Lys631Gln
LDBPK_040420	FR799591.2	165776	165776	c.1150C>A	p.Pro384Thr
LDBPK_040420	FR799591.2	165893	165893	c.1033G>T	p.Gly345Trp
LDBPK_040430	FR799591.2	172922	172922	c.1451A>G	p.Gln484Arg
LDBPK_040430	FR799591.2	173126	173126	c.1247C>T	p.Pro416Leu
LDBPK_040430	FR799591.2	173298	173298	c.1075A>G	p.Thr359Ala
LDBPK_040430	FR799591.2	174050	174050	c.323A>C	p.Gln108Pro
LDBPK_040440	FR799591.2	179912	179912	c.38C>A	p.Ala13Asp
LDBPK_040490	FR799591.2	191348	191348	c.7803A>G	p.Ile2601Met
LDBPK_040490	FR799591.2	191602	191602	c.7549C>T	p.Pro2517Ser
LDBPK_040490	FR799591.2	191824	191824	c.7327C>T	p.Pro2443Ser
LDBPK_040490	FR799591.2	193299	193299	c.5852G>A	p.Arg1951Gln
LDBPK_040490	FR799591.2	194455	194455	c.4696A>G	p.Thr1566Ala
LDBPK_040490	FR799591.2	194485	194485	c.4666G>A	p.Gly1556Ser
LDBPK_040490	FR799591.2	194550	194550	c.4601C>T	p.Ala1534Val
LDBPK_040490	FR799591.2	196299	196299	c.2852T>A	p.Phe951Tyr
LDBPK_040490	FR799591.2	196684	196684	c.2467G>C	p.Asp823His
LDBPK_040490	FR799591.2	196804	196804	c.2347G>A	p.Gly783Ser
LDBPK_040490	FR799591.2	196999	196999	c.2152A>G	p.Thr718Ala
LDBPK_040490	FR799591.2	197516	197516	c.1635G>A	p.Met545Ile
LDBPK_040490	FR799591.2	198153	198153	c.998C>G	p.Pro333Arg
LDBPK_040510	FR799591.2	209984	209984	c.1936A>C	p.Met646Leu
LDBPK_040510	FR799591.2	210200	210200	c.1720G>T	p.Val574Phe
LDBPK_040510	FR799591.2	210871	210871	c.1049T>C	p.Met350Thr
LDBPK_040510	FR799591.2	211619	211619	c.301C>G	p.His101Asp
LDBPK_040520	FR799591.2	213863	213863	c.902T>G	p.Val301Gly
LDBPK_040520	FR799591.2	213872	213872	c.893C>T	p.Ala298Val
LDBPK_040530	FR799591.2	217471	217471	c.1726C>A	p.His576Asn
LDBPK_040530	FR799591.2	217635	217635	c.1562C>A	p.Pro521His
LDBPK_040530	FR799591.2	217654	217654	c.1543T>A	p.Ser515Thr
LDBPK_040530	FR799591.2	217807	217807	c.1390G>A	p.Ala464Thr
LDBPK_040530	FR799591.2	217945	217945	c.1252T>C	p.Tyr418His
LDBPK_040530	FR799591.2	218610	218610	c.587A>G	p.Asp196Gly
LDBPK_040530	FR799591.2	218977	218977	c.220A>G	p.Ile74Val
LDBPK_040540	FR799591.2	220969	220969	c.3817G>A	p.Ala1273Thr
LDBPK_040540	FR799591.2	221123	221123	c.3663A>C	p.Glu1221Asp
LDBPK_040540	FR799591.2	222753	222753	c.2033A>G	p.Gln678Arg
LDBPK_040540	FR799591.2	223341	223341	c.1445C>T	p.Ala482Val
LDBPK_040540	FR799591.2	223372	223372	c.1414T>C	p.Tyr472His
LDBPK_040540	FR799591.2	223476	223476	c.1310G>T	p.Arg437Leu
LDBPK_040540	FR799591.2	223746	223746	c.1040G>A	p.Cys347Tyr
LDBPK_040540	FR799591.2	223794	223794	c.992A>G	p.Asp331Gly
LDBPK_040540	FR799591.2	224258	224258	c.528A>C	p.Arg176Ser
LDBPK_040540	FR799591.2	224623	224623	c.163G>A	p.Ala55Thr
LDBPK_040560	FR799591.2	233944	233944	c.4076T>C	p.Leu1359Pro
LDBPK_040560	FR799591.2	234365	234365	c.3655G>A	p.Asp1219Asn
LDBPK_040560	FR799591.2	237608	237608	c.412G>T	p.Ala138Ser
LDBPK_040560	FR799591.2	237704	237704	c.316C>T	p.Arg106Trp
LDBPK_040570	FR799591.2	240749	240749	c.185T>C	p.Val62Ala
LDBPK_040580	FR799591.2	241833	241833	c.649G>A	p.Val217Met
LDBPK_040580	FR799591.2	242187	242187	c.295A>G	p.Ile99Val
LDBPK_040580	FR799591.2	242313	242313	c.169G>A	p.Gly57Ser
LDBPK_040590	FR799591.2	244190	244190	c.8381A>G	p.Asn2794Ser
LDBPK_040590	FR799591.2	244461	244461	c.8110T>A	p.Trp2704Arg
LDBPK_040590	FR799591.2	244479	244479	c.8092A>G	p.Asn2698Asp
LDBPK_040590	FR799591.2	244613	244613	c.7958G>A	p.Arg2653His
LDBPK_040590	FR799591.2	245292	245292	c.7279G>A	p.Ala2427Thr
LDBPK_040590	FR799591.2	245501	245501	c.7070A>G	p.Gln2357Arg
LDBPK_040590	FR799591.2	245584	245584	c.6987A>C	p.Arg2329Ser
LDBPK_040590	FR799591.2	245784	245784	c.6787A>G	p.Arg2263Gly
LDBPK_040590	FR799591.2	247377	247377	c.5194T>C	p.Cys1732Arg
LDBPK_040590	FR799591.2	247496	247496	c.5075C>G	p.Ala1692Gly
LDBPK_040590	FR799591.2	248570	248570	c.4001T>G	p.Leu1334Arg
LDBPK_040590	FR799591.2	248805	248805	c.3766A>G	p.Thr1256Ala
LDBPK_040590	FR799591.2	249249	249249	c.3322A>G	p.Met1108Val
LDBPK_040590	FR799591.2	249341	249341	c.3230A>G	p.Asp1077Gly
LDBPK_040590	FR799591.2	249596	249596	c.2975A>C	p.Lys992Thr
LDBPK_040590	FR799591.2	249926	249926	c.2645G>A	p.Gly882Asp
LDBPK_040590	FR799591.2	250016	250016	c.2555T>C	p.Met852Thr
LDBPK_040590	FR799591.2	250979	250979	c.1592G>A	p.Gly531Glu
LDBPK_040590	FR799591.2	250986	250986	c.1585A>T	p.Ser529Cys
LDBPK_040590	FR799591.2	251187	251187	c.1384T>G	p.Cys462Gly
LDBPK_040590	FR799591.2	251221	251221	c.1350C>G	p.Asp450Glu
LDBPK_040590	FR799591.2	251271	251271	c.1300G>A	p.Gly434Arg
LDBPK_040590	FR799591.2	251302	251302	c.1269C>A	p.Ser423Arg
LDBPK_040590	FR799591.2	251355	251355	c.1216G>T	p.Val406Phe
LDBPK_040590	FR799591.2	251628	251628	c.943C>G	p.Leu315Val
LDBPK_040590	FR799591.2	251708	251708	c.863G>T	p.Gly288Val
LDBPK_040590	FR799591.2	252146	252146	c.425T>C	p.Val142Ala
LDBPK_040590	FR799591.2	252519	252519	c.52A>G	p.Thr18Ala
LDBPK_040600	FR799591.2	254609	254609	c.460G>A	p.Ala154Thr
LDBPK_040600	FR799591.2	254647	254647	c.422T>C	p.Val141Ala
LDBPK_040600	FR799591.2	255013	255013	c.56T>C	p.Leu19Pro
LDBPK_040610	FR799591.2	256257	256257	c.3518C>T	p.Pro1173Leu
LDBPK_040610	FR799591.2	256383	256383	c.3392G>A	p.Gly1131Asp
LDBPK_040610	FR799591.2	256657	256657	c.3118G>A	p.Ala1040Thr
LDBPK_040610	FR799591.2	256960	256960	c.2815A>G	p.Thr939Ala
LDBPK_040610	FR799591.2	257977	257977	c.1798C>T	p.Pro600Ser
LDBPK_040610	FR799591.2	258660	258660	c.1115G>T	p.Ser372Ile
LDBPK_040610	FR799591.2	259524	259524	c.251A>T	p.Asn84Ile
LDBPK_040620	FR799591.2	263598	263598	c.443G>A	p.Ser148Asn
LDBPK_040620	FR799591.2	263635	263635	c.406G>A	p.Val136Ile
LDBPK_040620	FR799591.2	263640	263640	c.401C>T	p.Ser134Leu
LDBPK_040640	FR799591.2	266754	266754	c.897G>T	p.Arg299Ser
LDBPK_040640	FR799591.2	266779	266779	c.872C>T	p.Thr291Ile
LDBPK_040640	FR799591.2	267514	267514	c.137A>G	p.Asn46Ser
LDBPK_040650	FR799591.2	272153	272153	c.1075A>G	p.Thr359Ala
LDBPK_040650	FR799591.2	272633	272633	c.595G>A	p.Val199Ile
LDBPK_040650	FR799591.2	272779	272779	c.449T>A	p.Val150Glu
LDBPK_040700	FR799591.2	285087	285087	c.2506G>A	p.Ala836Thr
LDBPK_040700	FR799591.2	287394	287394	c.199T>C	p.Tyr67His
LDBPK_040700	FR799591.2	287445	287445	c.148A>G	p.Asn50Asp
LDBPK_040710	FR799591.2	289381	289381	c.2017T>C	p.Ser673Pro
LDBPK_040710	FR799591.2	290265	290265	c.1133T>A	p.Val378Glu
LDBPK_040720	FR799591.2	295995	295995	c.1415C>T	p.Ser472Phe
LDBPK_040720	FR799591.2	296575	296575	c.835A>G	p.Thr279Ala
LDBPK_040720	FR799591.2	296754	296754	c.656A>G	p.Asn219Ser
LDBPK_040740	FR799591.2	302934	302934	c.824C>G	p.Thr275Arg
LDBPK_040740	FR799591.2	303118	303118	c.640T>C	p.Ser214Pro
LDBPK_040740	FR799591.2	303696	303696	c.62A>G	p.Asn21Ser
LDBPK_040760	FR799591.2	308367	308367	c.11A>G	p.Tyr4Cys
LDBPK_040780	FR799591.2	312741	312741	c.1631G>A	p.Arg544His
LDBPK_040780	FR799591.2	313630	313630	c.742T>C	p.Phe248Leu
LDBPK_040780	FR799591.2	314046	314046	c.326C>G	p.Ala109Gly
LDBPK_040790	FR799591.2	315890	315890	c.2900T>C	p.Val967Ala
LDBPK_040790	FR799591.2	316195	316195	c.2595G>C	p.Gln865His
LDBPK_040790	FR799591.2	317822	317822	c.968A>C	p.Gln323Pro
LDBPK_040800	FR799591.2	320966	320966	c.511G>A	p.Ala171Thr
LDBPK_040800	FR799591.2	320974	320974	c.503A>G	p.His168Arg
LDBPK_040800	FR799591.2	321089	321089	c.388A>C	p.Lys130Gln
LDBPK_040800	FR799591.2	321400	321400	c.77A>C	p.Asn26Thr
LDBPK_040810	FR799591.2	323482	323482	c.308G>A	p.Arg103Lys
LDBPK_040830	FR799591.2	328298	328298	c.3243C>G	p.Asp1081Glu
LDBPK_040830	FR799591.2	328383	328383	c.3158A>T	p.Gln1053Leu
LDBPK_040830	FR799591.2	328720	328720	c.2821T>C	p.Cys941Arg
LDBPK_040830	FR799591.2	328940	328940	c.2601C>G	p.His867Gln
LDBPK_040830	FR799591.2	328989	328989	c.2552G>A	p.Arg851Gln
LDBPK_040830	FR799591.2	330328	330328	c.1213G>C	p.Gly405Arg
LDBPK_040830	FR799591.2	331071	331071	c.470C>T	p.Ala157Val
LDBPK_040840	FR799591.2	332913	332913	c.1958G>C	p.Gly653Ala
LDBPK_040840	FR799591.2	334729	334729	c.142A>G	p.Thr48Ala
LDBPK_040840	FR799591.2	334831	334831	c.40T>C	p.Ser14Pro
LDBPK_040850	FR799591.2	337562	337562	c.505G>A	p.Gly169Ser
LDBPK_040870	FR799591.2	343306	343306	c.3524G>A	p.Gly1175Asp
LDBPK_040870	FR799591.2	343445	343445	c.3385G>A	p.Gly1129Ser
LDBPK_040870	FR799591.2	343589	343589	c.3241G>A	p.Ala1081Thr
LDBPK_040870	FR799591.2	343658	343658	c.3172C>T	p.Pro1058Ser
LDBPK_040870	FR799591.2	343727	343727	c.3103C>T	p.Pro1035Ser
LDBPK_040870	FR799591.2	344135	344135	c.2695G>A	p.Gly899Ser
LDBPK_040870	FR799591.2	344794	344794	c.2036A>C	p.Asn679Thr
LDBPK_040870	FR799591.2	344893	344893	c.1937C>T	p.Ala646Val
LDBPK_040870	FR799591.2	345404	345404	c.1426G>A	p.Gly476Ser
LDBPK_040870	FR799591.2	346127	346127	c.703C>T	p.Pro235Ser
LDBPK_040880	FR799591.2	349061	349061	c.254A>C	p.Glu85Ala
LDBPK_040880	FR799591.2	349311	349311	c.4C>T	p.Arg2Cys
LDBPK_040890	FR799591.2	351282	351282	c.3728A>G	p.Tyr1243Cys
LDBPK_040890	FR799591.2	351862	351862	c.3148C>T	p.His1050Tyr
LDBPK_040890	FR799591.2	351975	351975	c.3035T>C	p.Leu1012Pro
LDBPK_040890	FR799591.2	352015	352015	c.2995C>T	p.Arg999Trp
LDBPK_040890	FR799591.2	352371	352371	c.2639G>C	p.Trp880Ser
LDBPK_040890	FR799591.2	352536	352536	c.2474T>G	p.Ile825Ser
LDBPK_040900	FR799591.2	356852	356852	c.5174A>C	p.Lys1725Thr
LDBPK_040900	FR799591.2	356900	356900	c.5126T>G	p.Val1709Gly
LDBPK_040900	FR799591.2	358968	358968	c.3058T>C	p.Cys1020Arg
LDBPK_040900	FR799591.2	359742	359742	c.2284G>A	p.Glu762Lys
LDBPK_040900	FR799591.2	360396	360396	c.1630C>T	p.Pro544Ser
LDBPK_040900	FR799591.2	361305	361305	c.721G>A	p.Ala241Thr
LDBPK_040900	FR799591.2	361392	361392	c.634A>G	p.Ser212Gly
LDBPK_040900	FR799591.2	361973	361973	c.53A>C	p.Glu18Ala
LDBPK_040920	FR799591.2	367329	367329	c.977C>T	p.Ala326Val
LDBPK_040930	FR799591.2	370214	370214	c.422T>C	p.Val141Ala
LDBPK_040970	FR799591.2	379232	379232	c.677C>T	p.Ala226Val
LDBPK_040990	FR799591.2	385561	385561	c.929T>C	p.Ile310Thr
LDBPK_040990	FR799591.2	386036	386036	c.454A>G	p.Thr152Ala
LDBPK_041080	FR799591.2	413248	413248	c.393A>C	p.Glu131Asp
LDBPK_041090	FR799591.2	414319	414319	c.19G>A	p.Gly7Arg
LDBPK_041100	FR799591.2	414638	414638	c.3748G>C	p.Val1250Leu
LDBPK_041100	FR799591.2	416224	416224	c.2162T>C	p.Val721Ala
LDBPK_041100	FR799591.2	416440	416440	c.1946G>A	p.Arg649Gln
LDBPK_041130	FR799591.2	426201	426201	c.2150C>T	p.Pro717Leu
LDBPK_041130	FR799591.2	427067	427067	c.1284A>C	p.Gln428His
LDBPK_041130	FR799591.2	427998	427998	c.353T>C	p.Met118Thr
LDBPK_041160	FR799591.2	432812	432812	c.410T>G	p.Val137Gly
LDBPK_041180	FR799591.2	438690	438690	c.148G>A	p.Ala50Thr
LDBPK_041180	FR799591.2	438717	438717	c.121T>G	p.Trp41Gly
LDBPK_041180	FR799591.2	438718	438718	c.120C>G	p.Ser40Arg
LDBPK_041200	FR799591.2	455578	455578	c.3144G>C	p.Met1048Ile
LDBPK_041210	FR799591.2	460255	460255	c.1325G>A	p.Gly442Asp
LDBPK_041210	FR799591.2	460267	460267	c.1313C>A	p.Pro438His
LDBPK_041210	FR799591.2	460357	460357	c.1223G>A	p.Gly408Asp
LDBPK_041210	FR799591.2	460396	460396	c.1184C>T	p.Ala395Val
LDBPK_041210	FR799591.2	460568	460568	c.1012G>T	p.Val338Phe
LDBPK_041210	FR799591.2	461323	461323	c.257G>A	p.Gly86Asp
LDBPK_041210	FR799591.2	461525	461525	c.55G>T	p.Val19Leu
LDBPK_041220	FR799591.2	462719	462719	c.264A>G	p.Ile88Met
LDBPK_041220	FR799591.2	462822	462822	c.161A>C	p.His54Pro
LDBPK_041230	FR799591.2	467804	467804	c.1054G>A	p.Gly352Ser
LDBPK_041230	FR799591.2	468096	468096	c.762T>G	p.His254Gln
LDBPK_041240	FR799591.2	470490	470490	c.2548G>C	p.Ala850Pro
LDBPK_041240	FR799591.2	470525	470525	c.2513T>C	p.Ile838Thr
LDBPK_041240	FR799591.2	471606	471606	c.1432A>G	p.Thr478Ala
LDBPK_041240	FR799591.2	471976	471976	c.1062G>T	p.Glu354Asp
LDBPK_050010	FR799592.1	5891	5891	c.1499T>A	p.Met500Lys
LDBPK_050010	FR799592.1	5892	5892	c.1500G>C	p.Met500Ile
LDBPK_050010	FR799592.1	6085	6085	c.1693G>A	p.Ala565Thr
LDBPK_050010	FR799592.1	6261	6261	c.1869G>C	p.Lys623Asn
LDBPK_050010	FR799592.1	6749	6749	c.2357T>C	p.Val786Ala
LDBPK_050010	FR799592.1	6806	6806	c.2414G>C	p.Cys805Ser
LDBPK_050040	FR799592.1	10478	10478	c.259A>G	p.Asn87Asp
LDBPK_050040	FR799592.1	10824	10824	c.605C>T	p.Ala202Val
LDBPK_050040	FR799592.1	11133	11133	c.914A>C	p.Glu305Ala
LDBPK_050050	FR799592.1	15457	15457	c.2293G>A	p.Gly765Ser
LDBPK_050150	FR799592.1	46360	46360	c.1319T>C	p.Val440Ala
LDBPK_050160	FR799592.1	47824	47824	c.385G>A	p.Asp129Asn
LDBPK_050160	FR799592.1	48059	48059	c.620A>G	p.Gln207Arg
LDBPK_050160	FR799592.1	48104	48104	c.665G>C	p.Cys222Ser
LDBPK_050160	FR799592.1	48926	48926	c.1487A>G	p.Gln496Arg
LDBPK_050170	FR799592.1	49537	49537	c.30A>T	p.Gln10His
LDBPK_050170	FR799592.1	49928	49928	c.421A>G	p.Thr141Ala
LDBPK_050170	FR799592.1	50037	50037	c.530C>G	p.Ala177Gly
LDBPK_050170	FR799592.1	50078	50078	c.571T>A	p.Cys191Ser
LDBPK_050170	FR799592.1	50250	50250	c.743G>A	p.Ser248Asn
LDBPK_050170	FR799592.1	50501	50501	c.994G>A	p.Gly332Ser
LDBPK_050170	FR799592.1	51177	51177	c.1670C>T	p.Thr557Met
LDBPK_050170	FR799592.1	51572	51572	c.2065C>A	p.Pro689Thr
LDBPK_050170	FR799592.1	51681	51681	c.2174T>C	p.Val725Ala
LDBPK_050190	FR799592.1	57086	57086	c.881C>T	p.Ala294Val
LDBPK_050200	FR799592.1	60085	60085	c.1906G>A	p.Asp636Asn
LDBPK_050210	FR799592.1	61505	61505	c.200G>A	p.Gly67Asp
LDBPK_050210	FR799592.1	62552	62552	c.1247G>A	p.Gly416Asp
LDBPK_050210	FR799592.1	63050	63050	c.1745T>C	p.Val582Ala
LDBPK_050210	FR799592.1	63130	63130	c.1825C>T	p.Leu609Phe
LDBPK_050210	FR799592.1	63161	63161	c.1856G>C	p.Gly619Ala
LDBPK_050210	FR799592.1	64313	64313	c.3008C>T	p.Pro1003Leu
LDBPK_050210	FR799592.1	64501	64501	c.3196A>G	p.Thr1066Ala
LDBPK_050210	FR799592.1	64535	64535	c.3230C>G	p.Ala1077Gly
LDBPK_050220	FR799592.1	67584	67584	c.211A>C	p.Lys71Gln
LDBPK_050220	FR799592.1	68188	68188	c.815A>C	p.Gln272Pro
LDBPK_050220	FR799592.1	68326	68326	c.953A>T	p.Gln318Leu
LDBPK_050220	FR799592.1	68355	68355	c.982T>C	p.Cys328Arg
LDBPK_050220	FR799592.1	68442	68442	c.1069G>A	p.Gly357Arg
LDBPK_050220	FR799592.1	68473	68473	c.1100T>G	p.Ile367Ser
LDBPK_050220	FR799592.1	68520	68520	c.1147A>G	p.Thr383Ala
LDBPK_050220	FR799592.1	68715	68715	c.1342G>A	p.Ala448Thr
LDBPK_050220	FR799592.1	68842	68842	c.1469A>G	p.Asn490Ser
LDBPK_050220	FR799592.1	68941	68941	c.1568A>G	p.His523Arg
LDBPK_050220	FR799592.1	69045	69045	c.1672A>G	p.Thr558Ala
LDBPK_050220	FR799592.1	69247	69247	c.1874A>G	p.Glu625Gly
LDBPK_050230	FR799592.1	74629	74629	c.964G>C	p.Val322Leu
LDBPK_050240	FR799592.1	77211	77211	c.243G>T	p.Trp81Cys
LDBPK_050240	FR799592.1	77642	77642	c.674C>T	p.Ala225Val
LDBPK_050240	FR799592.1	77678	77678	c.710C>G	p.Thr237Ser
LDBPK_050240	FR799592.1	77963	77963	c.995A>T	p.His332Leu
LDBPK_050260	FR799592.1	82418	82418	c.593T>G	p.Val198Gly
LDBPK_050260	FR799592.1	82624	82624	c.799C>T	p.Leu267Phe
LDBPK_050310	FR799592.1	93264	93264	c.1178G>C	p.Gly393Ala
LDBPK_050330	FR799592.1	98067	98067	c.1028G>A	p.Gly343Asp
LDBPK_050330	FR799592.1	99140	99140	c.2101A>G	p.Ile701Val
LDBPK_050330	FR799592.1	99332	99332	c.2293G>A	p.Gly765Ser
LDBPK_050350	FR799592.1	104154	104154	c.749G>T	p.Arg250Leu
LDBPK_050370	FR799592.1	109413	109413	c.886A>G	p.Asn296Asp
LDBPK_050410	FR799592.1	132078	132078	c.215A>G	p.Tyr72Cys
LDBPK_050410	FR799592.1	132089	132089	c.226T>C	p.Tyr76His
LDBPK_050410	FR799592.1	132228	132228	c.365T>G	p.Ile122Ser
LDBPK_050410	FR799592.1	133532	133532	c.1669C>G	p.Leu557Val
LDBPK_050430	FR799592.1	139021	139021	c.419A>G	p.Asn140Ser
LDBPK_050440	FR799592.1	141795	141795	c.619A>G	p.Thr207Ala
LDBPK_050440	FR799592.1	143627	143627	c.2451T>A	p.His817Gln
LDBPK_050460	FR799592.1	148126	148126	c.1625C>T	p.Ala542Val
LDBPK_050470	FR799592.1	150349	150349	c.464C>G	p.Pro155Arg
LDBPK_050480	FR799592.1	151662	151662	c.33C>G	p.Asp11Glu
LDBPK_050480	FR799592.1	152492	152492	c.863C>T	p.Thr288Ile
LDBPK_050480	FR799592.1	152659	152659	c.1030A>G	p.Thr344Ala
LDBPK_050490	FR799592.1	156752	156752	c.146C>G	p.Ala49Gly
LDBPK_050490	FR799592.1	156970	156970	c.364G>A	p.Val122Met
LDBPK_050490	FR799592.1	157124	157124	c.518G>A	p.Ser173Asn
LDBPK_050500	FR799592.1	158823	158823	c.157T>C	p.Trp53Arg
LDBPK_050530	FR799592.1	169406	169406	c.11A>G	p.Lys4Arg
LDBPK_050530	FR799592.1	170881	170881	c.1486A>G	p.Met496Val
LDBPK_050530	FR799592.1	171119	171119	c.1724T>C	p.Val575Ala
LDBPK_050530	FR799592.1	172489	172489	c.3094T>C	p.Tyr1032His
LDBPK_050530	FR799592.1	173485	173485	c.4090G>A	p.Gly1364Ser
LDBPK_050530	FR799592.1	175038	175038	c.5643G>C	p.Gln1881His
LDBPK_050570	FR799592.1	184363	184363	c.265G>A	p.Gly89Ser
LDBPK_050570	FR799592.1	184417	184417	c.319G>A	p.Ala107Thr
LDBPK_050580	FR799592.1	186615	186615	c.154T>C	p.Ser52Pro
LDBPK_050590	FR799592.1	192469	192469	c.1152G>T	p.Leu384Phe
LDBPK_050600	FR799592.1	196954	196954	c.1946C>G	p.Ala649Gly
LDBPK_050610	FR799592.1	198828	198828	c.340G>T	p.Ala114Ser
LDBPK_050610	FR799592.1	200520	200520	c.2032C>A	p.Leu678Met
LDBPK_050610	FR799592.1	200975	200975	c.2487C>G	p.Asp829Glu
LDBPK_050620	FR799592.1	205101	205101	c.1279G>A	p.Ala427Thr
LDBPK_050630	FR799592.1	206666	206666	c.170G>T	p.Ser57Ile
LDBPK_050630	FR799592.1	208190	208190	c.1694G>A	p.Ser565Asn
LDBPK_050630	FR799592.1	208502	208502	c.2006T>C	p.Ile669Thr
LDBPK_050630	FR799592.1	208766	208766	c.2270G>A	p.Arg757His
LDBPK_050640	FR799592.1	212129	212129	c.1527G>C	p.Trp509Cys
LDBPK_050640	FR799592.1	212238	212238	c.1636C>G	p.Pro546Ala
LDBPK_050640	FR799592.1	212808	212808	c.2206C>G	p.Pro736Ala
LDBPK_050650	FR799592.1	218610	218610	c.685C>G	p.Pro229Ala
LDBPK_050650	FR799592.1	218827	218827	c.902G>A	p.Ser301Asn
LDBPK_050660	FR799592.1	223212	223212	c.62C>A	p.Thr21Asn
LDBPK_050670	FR799592.1	225330	225330	c.52C>T	p.Pro18Ser
LDBPK_050670	FR799592.1	225559	225559	c.281T>C	p.Val94Ala
LDBPK_050670	FR799592.1	227533	227533	c.2255C>T	p.Pro752Leu
LDBPK_050670	FR799592.1	227656	227656	c.2378G>A	p.Ser793Asn
LDBPK_050670	FR799592.1	227838	227838	c.2560G>A	p.Glu854Lys
LDBPK_050670	FR799592.1	227905	227905	c.2627T>C	p.Leu876Ser
LDBPK_050670	FR799592.1	228603	228603	c.3325A>G	p.Thr1109Ala
LDBPK_050670	FR799592.1	229006	229006	c.3728C>A	p.Ala1243Asp
LDBPK_050670	FR799592.1	229105	229105	c.3827A>C	p.Lys1276Thr
LDBPK_050670	FR799592.1	229414	229414	c.4136A>G	p.Asp1379Gly
LDBPK_050670	FR799592.1	231298	231298	c.6020G>T	p.Gly2007Val
LDBPK_050680	FR799592.1	234892	234892	c.77T>C	p.Met26Thr
LDBPK_050680	FR799592.1	235673	235673	c.858G>T	p.Gln286His
LDBPK_050690	FR799592.1	237256	237256	c.68A>G	p.Gln23Arg
LDBPK_050690	FR799592.1	238492	238492	c.1304T>C	p.Val435Ala
LDBPK_050690	FR799592.1	240159	240159	c.2971T>G	p.Leu991Val
LDBPK_050690	FR799592.1	241492	241492	c.4304T>G	p.Val1435Gly
LDBPK_050700	FR799592.1	248199	248199	c.398G>A	p.Arg133Gln
LDBPK_050700	FR799592.1	248460	248460	c.659T>C	p.Leu220Pro
LDBPK_050700	FR799592.1	248514	248514	c.713G>A	p.Arg238Lys
LDBPK_050700	FR799592.1	248586	248586	c.785G>A	p.Arg262Gln
LDBPK_050700	FR799592.1	249576	249576	c.1775A>C	p.Gln592Pro
LDBPK_050700	FR799592.1	249836	249836	c.2035G>A	p.Gly679Ser
LDBPK_050710	FR799592.1	256529	256529	c.271A>G	p.Thr91Ala
LDBPK_050710	FR799592.1	256854	256854	c.596A>G	p.Gln199Arg
LDBPK_050710	FR799592.1	257772	257772	c.1514C>A	p.Ala505Glu
LDBPK_050710	FR799592.1	257922	257922	c.1664C>G	p.Ala555Gly
LDBPK_050710	FR799592.1	259091	259091	c.2833T>C	p.Trp945Arg
LDBPK_050710	FR799592.1	259259	259259	c.3001A>G	p.Met1001Val
LDBPK_050710	FR799592.1	259533	259533	c.3275T>C	p.Phe1092Ser
LDBPK_050710	FR799592.1	260063	260063	c.3805A>G	p.Ile1269Val
LDBPK_050710	FR799592.1	260225	260225	c.3967A>G	p.Thr1323Ala
LDBPK_050710	FR799592.1	260228	260228	c.3970A>G	p.Ser1324Gly
LDBPK_050710	FR799592.1	260381	260381	c.4123G>A	p.Ala1375Thr
LDBPK_050720	FR799592.1	262766	262766	c.38G>A	p.Arg13Gln
LDBPK_050720	FR799592.1	262958	262958	c.230G>A	p.Gly77Asp
LDBPK_050720	FR799592.1	263200	263200	c.472G>T	p.Ala158Ser
LDBPK_050720	FR799592.1	263288	263288	c.560T>C	p.Ile187Thr
LDBPK_050720	FR799592.1	263429	263429	c.701T>C	p.Val234Ala
LDBPK_050720	FR799592.1	263474	263474	c.746C>T	p.Ser249Phe
LDBPK_050720	FR799592.1	264230	264230	c.1502C>T	p.Ala501Val
LDBPK_050720	FR799592.1	264238	264238	c.1510G>A	p.Ala504Thr
LDBPK_050720	FR799592.1	264404	264404	c.1676G>T	p.Arg559Leu
LDBPK_050720	FR799592.1	264964	264964	c.2236A>G	p.Thr746Ala
LDBPK_050720	FR799592.1	265327	265327	c.2599C>T	p.Arg867Cys
LDBPK_050720	FR799592.1	265628	265628	c.2900C>T	p.Pro967Leu
LDBPK_050720	FR799592.1	265811	265811	c.3083T>G	p.Phe1028Cys
LDBPK_050720	FR799592.1	265883	265883	c.3155A>G	p.Gln1052Arg
LDBPK_050730	FR799592.1	270053	270053	c.1135G>C	p.Gly379Arg
LDBPK_050750	FR799592.1	275879	275879	c.937C>G	p.Leu313Val
LDBPK_050750	FR799592.1	276150	276150	c.1208T>C	p.Val403Ala
LDBPK_050750	FR799592.1	276155	276155	c.1213T>C	p.Phe405Leu
LDBPK_050750	FR799592.1	277242	277242	c.2300A>G	p.Glu767Gly
LDBPK_050760	FR799592.1	278706	278706	c.223G>A	p.Gly75Arg
LDBPK_050760	FR799592.1	279409	279409	c.926A>G	p.Glu309Gly
LDBPK_050760	FR799592.1	279687	279687	c.1204G>A	p.Glu402Lys
LDBPK_050760	FR799592.1	280600	280600	c.2117T>C	p.Val706Ala
LDBPK_050760	FR799592.1	282393	282393	c.3910A>G	p.Lys1304Glu
LDBPK_050760	FR799592.1	282466	282466	c.3983C>T	p.Pro1328Leu
LDBPK_050760	FR799592.1	282580	282580	c.4097A>G	p.Glu1366Gly
LDBPK_050760	FR799592.1	282751	282751	c.4268T>G	p.Val1423Gly
LDBPK_050770	FR799592.1	285453	285453	c.635T>C	p.Val212Ala
LDBPK_050770	FR799592.1	285471	285471	c.653A>G	p.Asn218Ser
LDBPK_050770	FR799592.1	285516	285516	c.698A>G	p.His233Arg
LDBPK_050770	FR799592.1	285662	285662	c.844T>C	p.Ser282Pro
LDBPK_050770	FR799592.1	286319	286319	c.1501T>C	p.Ser501Pro
LDBPK_050770	FR799592.1	286478	286478	c.1660G>T	p.Ala554Ser
LDBPK_050770	FR799592.1	286523	286523	c.1705A>G	p.Asn569Asp
LDBPK_050770	FR799592.1	286530	286530	c.1712G>C	p.Gly571Ala
LDBPK_050770	FR799592.1	286703	286703	c.1885G>A	p.Val629Ile
LDBPK_050770	FR799592.1	286860	286860	c.2042C>T	p.Thr681Ile
LDBPK_050770	FR799592.1	287004	287004	c.2186A>G	p.Asn729Ser
LDBPK_050770	FR799592.1	287055	287055	c.2237C>T	p.Pro746Leu
LDBPK_050770	FR799592.1	287058	287058	c.2240T>C	p.Ile747Thr
LDBPK_050770	FR799592.1	287141	287141	c.2323A>G	p.Thr775Ala
LDBPK_050770	FR799592.1	287838	287838	c.3020T>C	p.Leu1007Pro
LDBPK_050770	FR799592.1	287922	287922	c.3104G>A	p.Gly1035Asp
LDBPK_050770	FR799592.1	288256	288256	c.3438A>G	p.Ile1146Met
LDBPK_050770	FR799592.1	288306	288306	c.3488C>A	p.Ala1163Glu
LDBPK_050770	FR799592.1	288324	288324	c.3506C>T	p.Ala1169Val
LDBPK_050770	FR799592.1	288818	288818	c.4000G>T	p.Val1334Leu
LDBPK_050790	FR799592.1	293043	293043	c.182C>T	p.Ala61Val
LDBPK_050790	FR799592.1	293195	293195	c.334T>G	p.Phe112Val
LDBPK_050790	FR799592.1	293225	293225	c.364G>C	p.Asp122His
LDBPK_050790	FR799592.1	293573	293573	c.712T>C	p.Phe238Leu
LDBPK_050790	FR799592.1	293598	293598	c.737A>G	p.Asn246Ser
LDBPK_050790	FR799592.1	293810	293810	c.949A>G	p.Thr317Ala
LDBPK_050800	FR799592.1	294757	294757	c.320A>G	p.Asn107Ser
LDBPK_050800	FR799592.1	294922	294922	c.485A>G	p.Asn162Ser
LDBPK_050800	FR799592.1	295578	295578	c.1141G>A	p.Val381Ile
LDBPK_050800	FR799592.1	295750	295750	c.1313A>G	p.Lys438Arg
LDBPK_050820	FR799592.1	299849	299849	c.1639G>A	p.Gly547Ser
LDBPK_050830	FR799592.1	302401	302401	c.295G>A	p.Asp99Asn
LDBPK_050840	FR799592.1	306931	306931	c.941C>A	p.Ser314Tyr
LDBPK_050840	FR799592.1	308216	308216	c.2226G>C	p.Arg742Ser
LDBPK_050840	FR799592.1	309691	309691	c.3701A>G	p.Asn1234Ser
LDBPK_050850	FR799592.1	311647	311647	c.35A>C	p.Lys12Thr
LDBPK_050850	FR799592.1	312415	312415	c.803T>A	p.Leu268Gln
LDBPK_050850	FR799592.1	313293	313293	c.1681G>C	p.Gly561Arg
LDBPK_050870	FR799592.1	317358	317358	c.1262C>T	p.Thr421Met
LDBPK_050870	FR799592.1	318191	318191	c.2095T>C	p.Trp699Arg
LDBPK_050870	FR799592.1	318708	318708	c.2612G>C	p.Ser871Thr
LDBPK_050870	FR799592.1	319700	319700	c.3604A>G	p.Thr1202Ala
LDBPK_050870	FR799592.1	320322	320322	c.4226C>T	p.Ala1409Val
LDBPK_050870	FR799592.1	321864	321864	c.5768C>T	p.Thr1923Met
LDBPK_050870	FR799592.1	321873	321873	c.5777A>C	p.Glu1926Ala
LDBPK_050890	FR799592.1	324741	324741	c.33T>G	p.Asp11Glu
LDBPK_050890	FR799592.1	324994	324994	c.286G>C	p.Val96Leu
LDBPK_050890	FR799592.1	325381	325381	c.673T>G	p.Ser225Ala
LDBPK_050890	FR799592.1	325543	325543	c.835G>A	p.Asp279Asn
LDBPK_050890	FR799592.1	325823	325823	c.1115T>C	p.Val372Ala
LDBPK_050890	FR799592.1	326726	326726	c.2018G>T	p.Gly673Val
LDBPK_050900	FR799592.1	332925	332925	c.275C>A	p.Ser92Tyr
LDBPK_050900	FR799592.1	333500	333500	c.850C>G	p.Leu284Val
LDBPK_050910	FR799592.1	335736	335736	c.433G>A	p.Ala145Thr
LDBPK_050910	FR799592.1	335959	335959	c.656C>A	p.Pro219His
LDBPK_050910	FR799592.1	336110	336110	c.807A>C	p.Arg269Ser
LDBPK_050910	FR799592.1	336723	336723	c.1420T>C	p.Cys474Arg
LDBPK_050910	FR799592.1	336864	336864	c.1561A>G	p.Thr521Ala
LDBPK_050910	FR799592.1	337189	337189	c.1886G>A	p.Gly629Asp
LDBPK_050910	FR799592.1	337579	337579	c.2276G>A	p.Gly759Asp
LDBPK_050910	FR799592.1	337731	337731	c.2428C>G	p.Pro810Ala
LDBPK_050910	FR799592.1	337947	337947	c.2644A>G	p.Thr882Ala
LDBPK_050910	FR799592.1	338383	338383	c.3080A>T	p.Lys1027Met
LDBPK_050920	FR799592.1	339163	339163	c.46G>A	p.Gly16Ser
LDBPK_050920	FR799592.1	339209	339209	c.92C>T	p.Thr31Ile
LDBPK_050920	FR799592.1	339551	339551	c.434C>T	p.Ala145Val
LDBPK_050920	FR799592.1	339622	339622	c.505G>A	p.Ala169Thr
LDBPK_050920	FR799592.1	339718	339718	c.601C>T	p.Pro201Ser
LDBPK_050920	FR799592.1	339748	339748	c.631G>A	p.Ala211Thr
LDBPK_050920	FR799592.1	340007	340007	c.890G>A	p.Ser297Asn
LDBPK_050920	FR799592.1	340700	340700	c.1583C>A	p.Ser528Tyr
LDBPK_050920	FR799592.1	341346	341346	c.2229T>A	p.Asp743Glu
LDBPK_050920	FR799592.1	341357	341357	c.2240A>G	p.Gln747Arg
LDBPK_050920	FR799592.1	341422	341422	c.2305G>A	p.Gly769Ser
LDBPK_050920	FR799592.1	341476	341476	c.2359A>C	p.Ser787Arg
LDBPK_050920	FR799592.1	342286	342286	c.3169A>G	p.Ile1057Val
LDBPK_050930	FR799592.1	344856	344856	c.408C>G	p.Ser136Arg
LDBPK_050930	FR799592.1	345677	345677	c.1229T>C	p.Val410Ala
LDBPK_050930	FR799592.1	345715	345715	c.1267G>A	p.Val423Ile
LDBPK_050940	FR799592.1	346938	346938	c.103A>G	p.Met35Val
LDBPK_050940	FR799592.1	346954	346954	c.119T>C	p.Ile40Thr
LDBPK_050940	FR799592.1	347110	347110	c.275A>G	p.Asn92Ser
LDBPK_050940	FR799592.1	347137	347137	c.302T>A	p.Ile101Asn
LDBPK_050940	FR799592.1	347695	347695	c.860C>A	p.Ala287Glu
LDBPK_050940	FR799592.1	348298	348298	c.1463T>C	p.Leu488Pro
LDBPK_050940	FR799592.1	348886	348886	c.2051G>T	p.Arg684Leu
LDBPK_050940	FR799592.1	349897	349897	c.3062A>G	p.Glu1021Gly
LDBPK_050940	FR799592.1	349931	349931	c.3096G>T	p.Gln1032His
LDBPK_050940	FR799592.1	350187	350187	c.3352G>A	p.Val1118Ile
LDBPK_050940	FR799592.1	350263	350263	c.3428T>G	p.Ile1143Ser
LDBPK_050950	FR799592.1	353885	353885	c.1042T>A	p.Ser348Thr
LDBPK_050950	FR799592.1	354845	354845	c.2002A>G	p.Ser668Gly
LDBPK_050950	FR799592.1	355095	355095	c.2252C>T	p.Ala751Val
LDBPK_050950	FR799592.1	355147	355147	c.2304G>T	p.Met768Ile
LDBPK_050960	FR799592.1	357237	357237	c.396C>G	p.Asp132Glu
LDBPK_050960	FR799592.1	357364	357364	c.523G>A	p.Ala175Thr
LDBPK_050960	FR799592.1	357569	357569	c.728G>T	p.Arg243Leu
LDBPK_050960	FR799592.1	357639	357639	c.798G>T	p.Gln266His
LDBPK_050960	FR799592.1	358029	358029	c.1188A>G	p.Ile396Met
LDBPK_050970	FR799592.1	368462	368462	c.1094C>T	p.Ala365Val
LDBPK_051020	FR799592.1	379186	379186	c.2735C>T	p.Ala912Val
LDBPK_051020	FR799592.1	380178	380178	c.1743G>A	p.Met581Ile
LDBPK_051020	FR799592.1	380822	380822	c.1099G>C	p.Val367Leu
LDBPK_051020	FR799592.1	381736	381736	c.185T>C	p.Leu62Pro
LDBPK_051030	FR799592.1	382814	382814	c.67C>T	p.His23Tyr
LDBPK_051040	FR799592.1	384397	384397	c.52C>T	p.His18Tyr
LDBPK_051070	FR799592.1	391304	391304	c.895T>A	p.Leu299Met
LDBPK_051080	FR799592.1	393341	393341	c.26C>T	p.Ala9Val
LDBPK_051080	FR799592.1	394882	394882	c.1567G>T	p.Ala523Ser
LDBPK_051090	FR799592.1	400056	400056	c.846A>G	p.Ile282Met
LDBPK_051090	FR799592.1	400087	400087	c.877A>C	p.Met293Leu
LDBPK_051090	FR799592.1	400171	400171	c.961G>C	p.Asp321His
LDBPK_051110	FR799592.1	408255	408255	c.328G>A	p.Gly110Ser
LDBPK_051110	FR799592.1	409302	409302	c.1375A>G	p.Thr459Ala
LDBPK_051110	FR799592.1	409539	409539	c.1612G>A	p.Gly538Arg
LDBPK_051110	FR799592.1	409840	409840	c.1913G>A	p.Arg638Lys
LDBPK_051110	FR799592.1	410607	410607	c.2680C>T	p.Leu894Phe
LDBPK_051110	FR799592.1	411539	411539	c.3612G>T	p.Leu1204Phe
LDBPK_051120	FR799592.1	414919	414919	c.80G>A	p.Gly27Asp
LDBPK_051130	FR799592.1	418426	418426	c.1361C>T	p.Ala454Val
LDBPK_051130	FR799592.1	419614	419614	c.173C>A	p.Ala58Asp
LDBPK_051150	FR799592.1	422473	422473	c.2674G>A	p.Asp892Asn
LDBPK_051150	FR799592.1	422488	422488	c.2659G>A	p.Val887Met
LDBPK_051150	FR799592.1	422794	422794	c.2353A>G	p.Arg785Gly
LDBPK_051150	FR799592.1	423481	423481	c.1666T>G	p.Ser556Ala
LDBPK_051150	FR799592.1	424189	424189	c.958T>G	p.Cys320Gly
LDBPK_051150	FR799592.1	424663	424663	c.484A>G	p.Thr162Ala
LDBPK_051160	FR799592.1	427785	427785	c.490G>A	p.Ala164Thr
LDBPK_051160	FR799592.1	428024	428024	c.251G>A	p.Cys84Tyr
LDBPK_051170	FR799592.1	429392	429392	c.834G>C	p.Glu278Asp
LDBPK_051180	FR799592.1	432174	432174	c.5821A>C	p.Ser1941Arg
LDBPK_051180	FR799592.1	433018	433018	c.4977T>G	p.Phe1659Leu
LDBPK_051180	FR799592.1	433200	433200	c.4795A>C	p.Asn1599His
LDBPK_051180	FR799592.1	433201	433201	c.4794A>C	p.Gln1598His
LDBPK_051180	FR799592.1	433293	433293	c.4702A>G	p.Ile1568Val
LDBPK_051180	FR799592.1	433470	433470	c.4525G>T	p.Val1509Leu
LDBPK_051180	FR799592.1	433863	433863	c.4132A>G	p.Thr1378Ala
LDBPK_051180	FR799592.1	434020	434020	c.3975T>G	p.His1325Gln
LDBPK_051180	FR799592.1	434093	434093	c.3902C>G	p.Thr1301Ser
LDBPK_051180	FR799592.1	434554	434554	c.3441A>C	p.Glu1147Asp
LDBPK_051180	FR799592.1	435744	435744	c.2251G>A	p.Glu751Lys
LDBPK_051180	FR799592.1	435902	435902	c.2093T>C	p.Val698Ala
LDBPK_051180	FR799592.1	436065	436065	c.1930T>G	p.Ser644Ala
LDBPK_051180	FR799592.1	437381	437381	c.614A>C	p.Asn205Thr
LDBPK_051200	FR799592.1	440155	440155	c.800G>C	p.Cys267Ser
LDBPK_051200	FR799592.1	440515	440515	c.440T>C	p.Val147Ala
LDBPK_060020	FR799593.1	5428	5428	c.214T>G	p.Ser72Ala
LDBPK_060030	FR799593.1	13045	13045	c.303G>T	p.Glu101Asp
LDBPK_060030	FR799593.1	13076	13076	c.272C>T	p.Ala91Val
LDBPK_060030	FR799593.1	13137	13137	c.211G>A	p.Ala71Thr
LDBPK_060040	FR799593.1	15037	15037	c.44T>C	p.Val15Ala
LDBPK_060050	FR799593.1	21895	21895	c.1406C>T	p.Ala469Val
LDBPK_060070	FR799593.1	30579	30579	c.814A>G	p.Ser272Gly
LDBPK_060070	FR799593.1	30624	30624	c.769A>G	p.Thr257Ala
LDBPK_060070	FR799593.1	30776	30776	c.617C>T	p.Ala206Val
LDBPK_060070	FR799593.1	31283	31283	c.110G>A	p.Gly37Asp
LDBPK_060090	FR799593.1	42586	42586	c.113T>C	p.Phe38Ser
LDBPK_060110	FR799593.1	47692	47692	c.677T>A	p.Leu226His
LDBPK_060110	FR799593.1	47836	47836	c.533C>A	p.Ala178Asp
LDBPK_060110	FR799593.1	47974	47974	c.395C>T	p.Ala132Val
LDBPK_060110	FR799593.1	48335	48335	c.34G>A	p.Val12Met
LDBPK_060120	FR799593.1	49906	49906	c.512G>A	p.Ser171Asn
LDBPK_060120	FR799593.1	50222	50222	c.196G>A	p.Glu66Lys
LDBPK_060160	FR799593.1	56694	56694	c.638G>A	p.Gly213Asp
LDBPK_060170	FR799593.1	58916	58916	c.190G>C	p.Val64Leu
LDBPK_060180	FR799593.1	59937	59937	c.1648C>T	p.Pro550Ser
LDBPK_060190	FR799593.1	63302	63302	c.1624T>C	p.Ser542Pro
LDBPK_060190	FR799593.1	63965	63965	c.961G>T	p.Ala321Ser
LDBPK_060190	FR799593.1	64343	64343	c.583C>A	p.His195Asn
LDBPK_060200	FR799593.1	67297	67297	c.1166C>T	p.Ala389Val
LDBPK_060200	FR799593.1	67489	67489	c.974C>T	p.Ala325Val
LDBPK_060200	FR799593.1	68255	68255	c.208G>A	p.Ala70Thr
LDBPK_060200	FR799593.1	68275	68275	c.188A>G	p.Tyr63Cys
LDBPK_060210	FR799593.1	71276	71276	c.1766G>A	p.Arg589Lys
LDBPK_060210	FR799593.1	71795	71795	c.1247G>A	p.Arg416Lys
LDBPK_060210	FR799593.1	71956	71956	c.1086T>G	p.Ile362Met
LDBPK_060210	FR799593.1	72846	72846	c.196A>C	p.Ser66Arg
LDBPK_060230	FR799593.1	75519	75519	c.607G>A	p.Ala203Thr
LDBPK_060240	FR799593.1	78639	78639	c.1123A>G	p.Thr375Ala
LDBPK_060240	FR799593.1	79436	79436	c.326G>A	p.Arg109Gln
LDBPK_060250	FR799593.1	81874	81874	c.632T>C	p.Val211Ala
LDBPK_060250	FR799593.1	82006	82006	c.500C>T	p.Ala167Val
LDBPK_060260	FR799593.1	85698	85698	c.3101G>A	p.Arg1034Gln
LDBPK_060280	FR799593.1	93256	93256	c.2120C>T	p.Pro707Leu
LDBPK_060280	FR799593.1	93890	93890	c.1486T>G	p.Phe496Val
LDBPK_060280	FR799593.1	94156	94156	c.1220A>G	p.Gln407Arg
LDBPK_060280	FR799593.1	94459	94459	c.917C>G	p.Ala306Gly
LDBPK_060280	FR799593.1	94691	94691	c.685G>A	p.Ala229Thr
LDBPK_060280	FR799593.1	94912	94912	c.464A>C	p.Asn155Thr
LDBPK_060290	FR799593.1	97583	97583	c.708A>G	p.Ile236Met
LDBPK_060290	FR799593.1	97704	97704	c.587G>A	p.Arg196His
LDBPK_060300	FR799593.1	100584	100584	c.492G>T	p.Gln164His
LDBPK_060300	FR799593.1	100921	100921	c.155A>G	p.Asp52Gly
LDBPK_060310	FR799593.1	105008	105008	c.1960G>A	p.Glu654Lys
LDBPK_060320	FR799593.1	108417	108417	c.2567T>C	p.Met856Thr
LDBPK_060320	FR799593.1	108832	108832	c.2152A>G	p.Thr718Ala
LDBPK_060320	FR799593.1	109578	109578	c.1406T>C	p.Val469Ala
LDBPK_060320	FR799593.1	110553	110553	c.431G>A	p.Ser144Asn
LDBPK_060330	FR799593.1	115212	115212	c.788C>T	p.Thr263Ile
LDBPK_060350	FR799593.1	121203	121203	c.226T>C	p.Tyr76His
LDBPK_060360	FR799593.1	122512	122512	c.854G>C	p.Cys285Ser
LDBPK_060360	FR799593.1	123206	123206	c.160G>A	p.Ala54Thr
LDBPK_060360	FR799593.1	123268	123268	c.98G>A	p.Arg33Lys
LDBPK_060390	FR799593.1	135169	135169	c.1045T>G	p.Ser349Ala
LDBPK_060390	FR799593.1	136756	136756	c.2632A>C	p.Lys878Gln
LDBPK_060400	FR799593.1	137448	137448	c.218G>A	p.Ser73Asn
LDBPK_060410	FR799593.1	141240	141240	c.631T>C	p.Ser211Pro
LDBPK_060440	FR799593.1	148457	148457	c.1072C>A	p.Leu358Ile
LDBPK_060450	FR799593.1	152014	152014	c.1334C>T	p.Ser445Phe
LDBPK_060450	FR799593.1	152697	152697	c.2017C>T	p.Pro673Ser
LDBPK_060460	FR799593.1	154090	154090	c.101C>T	p.Thr34Ile
LDBPK_060480	FR799593.1	164327	164327	c.1635A>C	p.Gln545His
LDBPK_060480	FR799593.1	164561	164561	c.1869G>T	p.Glu623Asp
LDBPK_060490	FR799593.1	168419	168419	c.605A>G	p.Asp202Gly
LDBPK_060490	FR799593.1	169876	169876	c.2062G>A	p.Glu688Lys
LDBPK_060490	FR799593.1	170359	170359	c.2545G>A	p.Val849Ile
LDBPK_060490	FR799593.1	171277	171277	c.3463G>C	p.Gly1155Arg
LDBPK_060520	FR799593.1	177492	177492	c.422C>T	p.Ala141Val
LDBPK_060540	FR799593.1	186604	186604	c.2227A>G	p.Ile743Val
LDBPK_060540	FR799593.1	188129	188129	c.3752T>C	p.Val1251Ala
LDBPK_060570	FR799593.1	201526	201526	c.5057A>G	p.Asp1686Gly
LDBPK_060610	FR799593.1	208188	208188	c.342C>G	p.Asn114Lys
LDBPK_060610	FR799593.1	208370	208370	c.524A>G	p.Asp175Gly
LDBPK_060610	FR799593.1	208441	208441	c.595G>C	p.Gly199Arg
LDBPK_060610	FR799593.1	208452	208452	c.606C>A	p.Asp202Glu
LDBPK_060610	FR799593.1	209479	209479	c.1633A>T	p.Ser545Cys
LDBPK_060610	FR799593.1	209831	209831	c.1985T>C	p.Val662Ala
LDBPK_060610	FR799593.1	210191	210191	c.2345T>G	p.Leu782Arg
LDBPK_060610	FR799593.1	210338	210338	c.2492T>C	p.Leu831Ser
LDBPK_060610	FR799593.1	210473	210473	c.2627T>C	p.Leu876Pro
LDBPK_060610	FR799593.1	210767	210767	c.2921G>T	p.Gly974Val
LDBPK_060610	FR799593.1	210769	210769	c.2923G>A	p.Gly975Ser
LDBPK_060610	FR799593.1	211637	211637	c.3791C>A	p.Pro1264His
LDBPK_060610	FR799593.1	211822	211822	c.3976T>C	p.Phe1326Leu
LDBPK_060620	FR799593.1	213568	213568	c.323T>C	p.Val108Ala
LDBPK_060620	FR799593.1	213877	213877	c.632A>C	p.Asp211Ala
LDBPK_060620	FR799593.1	214083	214083	c.838C>T	p.Arg280Cys
LDBPK_060620	FR799593.1	214255	214255	c.1010T>C	p.Leu337Pro
LDBPK_060620	FR799593.1	214450	214450	c.1205G>A	p.Arg402Gln
LDBPK_060620	FR799593.1	214575	214575	c.1330T>G	p.Cys444Gly
LDBPK_060620	FR799593.1	214622	214622	c.1377C>G	p.Ile459Met
LDBPK_060620	FR799593.1	214815	214815	c.1570A>G	p.Ile524Val
LDBPK_060620	FR799593.1	215070	215070	c.1825C>T	p.Leu609Phe
LDBPK_060620	FR799593.1	215080	215080	c.1835C>T	p.Ser612Leu
LDBPK_060620	FR799593.1	215346	215346	c.2101C>T	p.Arg701Cys
LDBPK_060620	FR799593.1	215664	215664	c.2419A>G	p.Thr807Ala
LDBPK_060620	FR799593.1	215959	215959	c.2714C>T	p.Thr905Ile
LDBPK_060620	FR799593.1	216192	216192	c.2947A>G	p.Ser983Gly
LDBPK_060620	FR799593.1	216793	216793	c.3548C>G	p.Ala1183Gly
LDBPK_060620	FR799593.1	216912	216912	c.3667T>C	p.Ser1223Pro
LDBPK_060620	FR799593.1	216922	216922	c.3677G>C	p.Arg1226Pro
LDBPK_060640	FR799593.1	223519	223519	c.2300A>C	p.Asp767Ala
LDBPK_060640	FR799593.1	223540	223540	c.2321T>A	p.Phe774Tyr
LDBPK_060650	FR799593.1	225935	225935	c.49A>G	p.Thr17Ala
LDBPK_060650	FR799593.1	226290	226290	c.404A>G	p.Gln135Arg
LDBPK_060650	FR799593.1	227714	227714	c.1828G>A	p.Ala610Thr
LDBPK_060650	FR799593.1	228311	228311	c.2425T>C	p.Ser809Pro
LDBPK_060650	FR799593.1	228755	228755	c.2869A>C	p.Met957Leu
LDBPK_060650	FR799593.1	229964	229964	c.4078A>G	p.Thr1360Ala
LDBPK_060660	FR799593.1	234589	234589	c.545G>A	p.Arg182His
LDBPK_060660	FR799593.1	234898	234898	c.854T>G	p.Val285Gly
LDBPK_060660	FR799593.1	236092	236092	c.2048C>T	p.Ala683Val
LDBPK_060660	FR799593.1	236350	236350	c.2306C>T	p.Ala769Val
LDBPK_060660	FR799593.1	236493	236493	c.2449A>G	p.Lys817Glu
LDBPK_060660	FR799593.1	237081	237081	c.3037T>C	p.Ser1013Pro
LDBPK_060660	FR799593.1	237529	237529	c.3485C>T	p.Thr1162Met
LDBPK_060660	FR799593.1	237963	237963	c.3919G>A	p.Ala1307Thr
LDBPK_060660	FR799593.1	238090	238090	c.4046C>G	p.Thr1349Ser
LDBPK_060660	FR799593.1	238135	238135	c.4091C>A	p.Thr1364Asn
LDBPK_060660	FR799593.1	238444	238444	c.4400G>A	p.Ser1467Asn
LDBPK_060660	FR799593.1	238644	238644	c.4600G>A	p.Ala1534Thr
LDBPK_060660	FR799593.1	238660	238660	c.4616C>A	p.Ala1539Glu
LDBPK_060660	FR799593.1	238687	238687	c.4643C>T	p.Pro1548Leu
LDBPK_060660	FR799593.1	238765	238765	c.4721A>C	p.Asp1574Ala
LDBPK_060660	FR799593.1	238766	238766	c.4722T>G	p.Asp1574Glu
LDBPK_060660	FR799593.1	238785	238785	c.4741G>A	p.Gly1581Ser
LDBPK_060660	FR799593.1	238957	238957	c.4913A>G	p.Asp1638Gly
LDBPK_060660	FR799593.1	239397	239397	c.5353G>T	p.Gly1785Cys
LDBPK_060660	FR799593.1	239398	239398	c.5354G>T	p.Gly1785Val
LDBPK_060660	FR799593.1	239527	239527	c.5483G>C	p.Ser1828Thr
LDBPK_060660	FR799593.1	239814	239814	c.5770G>A	p.Ala1924Thr
LDBPK_060660	FR799593.1	240066	240066	c.6022T>G	p.Phe2008Val
LDBPK_060660	FR799593.1	240113	240113	c.6069T>G	p.His2023Gln
LDBPK_060660	FR799593.1	240124	240124	c.6080C>T	p.Thr2027Ile
LDBPK_060660	FR799593.1	240332	240332	c.6288G>T	p.Trp2096Cys
LDBPK_060660	FR799593.1	240810	240810	c.6766G>A	p.Ala2256Thr
LDBPK_060660	FR799593.1	240933	240933	c.6889A>G	p.Thr2297Ala
LDBPK_060660	FR799593.1	241124	241124	c.7080T>G	p.Ser2360Arg
LDBPK_060660	FR799593.1	241138	241138	c.7094T>C	p.Val2365Ala
LDBPK_060660	FR799593.1	241551	241551	c.7507T>C	p.Ser2503Pro
LDBPK_060660	FR799593.1	243343	243343	c.9299C>T	p.Ala3100Val
LDBPK_060680	FR799593.1	250526	250526	c.124C>T	p.Leu42Phe
LDBPK_060680	FR799593.1	251103	251103	c.701G>A	p.Ser234Asn
LDBPK_060680	FR799593.1	251205	251205	c.803C>T	p.Ala268Val
LDBPK_060680	FR799593.1	251925	251925	c.1523T>C	p.Leu508Ser
LDBPK_060680	FR799593.1	251960	251960	c.1558T>C	p.Ser520Pro
LDBPK_060680	FR799593.1	252167	252167	c.1765A>C	p.Thr589Pro
LDBPK_060690	FR799593.1	255022	255022	c.41G>A	p.Arg14His
LDBPK_060690	FR799593.1	255166	255166	c.185C>T	p.Pro62Leu
LDBPK_060690	FR799593.1	255196	255196	c.215G>C	p.Ser72Thr
LDBPK_060690	FR799593.1	255586	255586	c.605T>C	p.Val202Ala
LDBPK_060690	FR799593.1	256941	256941	c.1960G>A	p.Gly654Ser
LDBPK_060690	FR799593.1	258004	258004	c.3023C>T	p.Ala1008Val
LDBPK_060690	FR799593.1	258022	258022	c.3041C>T	p.Pro1014Leu
LDBPK_060700	FR799593.1	260560	260560	c.79G>A	p.Gly27Ser
LDBPK_060720	FR799593.1	264368	264368	c.58G>C	p.Gly20Arg
LDBPK_060720	FR799593.1	264600	264600	c.290G>A	p.Gly97Asp
LDBPK_060720	FR799593.1	264882	264882	c.572A>C	p.Glu191Ala
LDBPK_060720	FR799593.1	266013	266013	c.1703C>T	p.Ser568Leu
LDBPK_060720	FR799593.1	266594	266594	c.2284A>T	p.Thr762Ser
LDBPK_060720	FR799593.1	266949	266949	c.2639T>C	p.Val880Ala
LDBPK_060720	FR799593.1	267629	267629	c.3319T>C	p.Cys1107Arg
LDBPK_060720	FR799593.1	268050	268050	c.3740C>T	p.Ser1247Phe
LDBPK_060720	FR799593.1	268266	268266	c.3956T>C	p.Met1319Thr
LDBPK_060720	FR799593.1	269603	269603	c.5293G>A	p.Gly1765Ser
LDBPK_060720	FR799593.1	270055	270055	c.5745C>A	p.Asp1915Glu
LDBPK_060730	FR799593.1	274611	274611	c.511G>A	p.Gly171Ser
LDBPK_060730	FR799593.1	274674	274674	c.574G>T	p.Val192Phe
LDBPK_060730	FR799593.1	274753	274753	c.653A>G	p.Lys218Arg
LDBPK_060730	FR799593.1	274881	274881	c.781A>G	p.Ile261Val
LDBPK_060740	FR799593.1	283484	283484	c.179T>C	p.Met60Thr
LDBPK_060740	FR799593.1	283696	283696	c.391A>G	p.Asn131Asp
LDBPK_060740	FR799593.1	283735	283735	c.430G>C	p.Val144Leu
LDBPK_060740	FR799593.1	283748	283748	c.443G>T	p.Arg148Leu
LDBPK_060750	FR799593.1	287521	287521	c.646G>T	p.Ala216Ser
LDBPK_060750	FR799593.1	288595	288595	c.1720A>G	p.Thr574Ala
LDBPK_060750	FR799593.1	289997	289997	c.3122C>T	p.Pro1041Leu
LDBPK_060750	FR799593.1	291083	291083	c.4208G>A	p.Gly1403Asp
LDBPK_060750	FR799593.1	291241	291241	c.4366A>G	p.Ser1456Gly
LDBPK_060750	FR799593.1	291415	291415	c.4540G>A	p.Ala1514Thr
LDBPK_060750	FR799593.1	291761	291761	c.4886C>T	p.Ser1629Leu
LDBPK_060770	FR799593.1	296722	296722	c.76C>A	p.His26Asn
LDBPK_060770	FR799593.1	297142	297142	c.496G>A	p.Glu166Lys
LDBPK_060770	FR799593.1	298630	298630	c.1984A>G	p.Ile662Val
LDBPK_060770	FR799593.1	298948	298948	c.2302C>A	p.Gln768Lys
LDBPK_060780	FR799593.1	300822	300822	c.615C>G	p.His205Gln
LDBPK_060790	FR799593.1	303483	303483	c.68C>T	p.Ala23Val
LDBPK_060790	FR799593.1	304271	304271	c.856G>A	p.Val286Ile
LDBPK_060790	FR799593.1	304566	304566	c.1151A>C	p.Lys384Thr
LDBPK_060790	FR799593.1	304980	304980	c.1565C>T	p.Ala522Val
LDBPK_060790	FR799593.1	305668	305668	c.2253G>C	p.Arg751Ser
LDBPK_060790	FR799593.1	306507	306507	c.3092T>C	p.Val1031Ala
LDBPK_060790	FR799593.1	306773	306773	c.3358C>T	p.Pro1120Ser
LDBPK_060800	FR799593.1	311137	311137	c.74C>T	p.Thr25Met
LDBPK_060800	FR799593.1	311941	311941	c.878C>T	p.Ser293Leu
LDBPK_060800	FR799593.1	312111	312111	c.1048A>C	p.Lys350Gln
LDBPK_060800	FR799593.1	312355	312355	c.1292C>T	p.Ala431Val
LDBPK_060800	FR799593.1	312925	312925	c.1862C>A	p.Pro621Gln
LDBPK_060800	FR799593.1	312934	312934	c.1871C>A	p.Pro624Gln
LDBPK_060800	FR799593.1	315939	315939	c.4876A>T	p.Thr1626Ser
LDBPK_060800	FR799593.1	316144	316144	c.5081T>C	p.Met1694Thr
LDBPK_060810	FR799593.1	322583	322583	c.13C>T	p.Leu5Phe
LDBPK_060810	FR799593.1	322754	322754	c.184C>A	p.Arg62Ser
LDBPK_060810	FR799593.1	323256	323256	c.686T>G	p.Val229Gly
LDBPK_060810	FR799593.1	323687	323687	c.1117G>A	p.Gly373Ser
LDBPK_060810	FR799593.1	324068	324068	c.1498C>T	p.Pro500Ser
LDBPK_060810	FR799593.1	324311	324311	c.1741G>A	p.Ala581Thr
LDBPK_060810	FR799593.1	324641	324641	c.2071A>T	p.Ser691Cys
LDBPK_060810	FR799593.1	324863	324863	c.2293G>A	p.Glu765Lys
LDBPK_060810	FR799593.1	325070	325070	c.2500C>G	p.Pro834Ala
LDBPK_060810	FR799593.1	325686	325686	c.3116T>A	p.Val1039Glu
LDBPK_060810	FR799593.1	325764	325764	c.3194C>T	p.Ala1065Val
LDBPK_060810	FR799593.1	325773	325773	c.3203C>T	p.Ala1068Val
LDBPK_060810	FR799593.1	326032	326032	c.3462G>C	p.Trp1154Cys
LDBPK_060810	FR799593.1	326892	326892	c.4322T>C	p.Val1441Ala
LDBPK_060810	FR799593.1	328257	328257	c.5687C>G	p.Ala1896Gly
LDBPK_060810	FR799593.1	328926	328926	c.6356A>G	p.Asp2119Gly
LDBPK_060810	FR799593.1	329798	329798	c.7228C>T	p.Pro2410Ser
LDBPK_060810	FR799593.1	329826	329826	c.7256G>A	p.Arg2419His
LDBPK_060810	FR799593.1	330381	330381	c.7811C>A	p.Thr2604Lys
LDBPK_060810	FR799593.1	330584	330584	c.8014T>G	p.Phe2672Val
LDBPK_060810	FR799593.1	330647	330647	c.8077G>T	p.Ala2693Ser
LDBPK_060810	FR799593.1	331934	331934	c.9364A>T	p.Thr3122Ser
LDBPK_060820	FR799593.1	336688	336688	c.433G>A	p.Ala145Thr
LDBPK_060820	FR799593.1	337274	337274	c.1019A>C	p.Glu340Ala
LDBPK_060820	FR799593.1	337378	337378	c.1123G>A	p.Ala375Thr
LDBPK_060830	FR799593.1	342941	342941	c.2156C>T	p.Ser719Phe
LDBPK_060830	FR799593.1	343039	343039	c.2254G>C	p.Ala752Pro
LDBPK_060830	FR799593.1	343042	343042	c.2257T>G	p.Ser753Ala
LDBPK_060830	FR799593.1	343046	343046	c.2261G>C	p.Gly754Ala
LDBPK_060830	FR799593.1	343175	343175	c.2390G>A	p.Arg797Lys
LDBPK_060830	FR799593.1	343331	343331	c.2546T>C	p.Leu849Ser
LDBPK_060830	FR799593.1	343354	343354	c.2569A>G	p.Met857Val
LDBPK_060830	FR799593.1	343537	343537	c.2752G>A	p.Val918Ile
LDBPK_060830	FR799593.1	344980	344980	c.4195A>G	p.Ser1399Gly
LDBPK_060830	FR799593.1	345406	345406	c.4621A>G	p.Met1541Val
LDBPK_060830	FR799593.1	345517	345517	c.4732A>G	p.Ser1578Gly
LDBPK_060830	FR799593.1	345586	345586	c.4801A>G	p.Thr1601Ala
LDBPK_060840	FR799593.1	348883	348883	c.1484C>A	p.Ser495Tyr
LDBPK_060840	FR799593.1	348949	348949	c.1550G>C	p.Arg517Thr
LDBPK_060840	FR799593.1	349464	349464	c.2065G>A	p.Gly689Arg
LDBPK_060840	FR799593.1	350133	350133	c.2734G>A	p.Ala912Thr
LDBPK_060840	FR799593.1	350326	350326	c.2927C>A	p.Thr976Lys
LDBPK_060840	FR799593.1	350857	350857	c.3458A>C	p.Asp1153Ala
LDBPK_060840	FR799593.1	351700	351700	c.4301C>T	p.Thr1434Ile
LDBPK_060840	FR799593.1	352353	352353	c.4954T>A	p.Trp1652Arg
LDBPK_060840	FR799593.1	352579	352579	c.5180C>T	p.Ala1727Val
LDBPK_060840	FR799593.1	352684	352684	c.5285T>C	p.Met1762Thr
LDBPK_060840	FR799593.1	352702	352702	c.5303C>T	p.Ala1768Val
LDBPK_060840	FR799593.1	357751	357751	c.10352G>A	p.Cys3451Tyr
LDBPK_060850	FR799593.1	359496	359496	c.598C>T	p.His200Tyr
LDBPK_060860	FR799593.1	363049	363049	c.525C>A	p.Asp175Glu
LDBPK_060860	FR799593.1	365400	365400	c.2876G>A	p.Ser959Asn
LDBPK_060860	FR799593.1	366585	366585	c.4061A>G	p.Tyr1354Cys
LDBPK_060870	FR799593.1	368511	368511	c.394G>T	p.Ala132Ser
LDBPK_060870	FR799593.1	368536	368536	c.419C>T	p.Ala140Val
LDBPK_060880	FR799593.1	371506	371506	c.517A>G	p.Arg173Gly
LDBPK_060880	FR799593.1	371740	371740	c.751A>G	p.Thr251Ala
LDBPK_060880	FR799593.1	376630	376630	c.5641G>A	p.Glu1881Lys
LDBPK_060880	FR799593.1	377077	377077	c.6088C>A	p.Pro2030Thr
LDBPK_060880	FR799593.1	377134	377134	c.6145G>T	p.Gly2049Trp
LDBPK_060880	FR799593.1	377564	377564	c.6575C>T	p.Thr2192Met
LDBPK_060880	FR799593.1	378023	378023	c.7034G>A	p.Gly2345Asp
LDBPK_060880	FR799593.1	378478	378478	c.7489C>T	p.Arg2497Trp
LDBPK_060880	FR799593.1	379888	379888	c.8899C>G	p.Leu2967Val
LDBPK_060880	FR799593.1	380182	380182	c.9193A>G	p.Asn3065Asp
LDBPK_060880	FR799593.1	380767	380767	c.9778A>G	p.Asn3260Asp
LDBPK_060890	FR799593.1	383233	383233	c.395A>G	p.Asp132Gly
LDBPK_060900	FR799593.1	386321	386321	c.191A>G	p.Glu64Gly
LDBPK_060900	FR799593.1	387391	387391	c.1261G>A	p.Ala421Thr
LDBPK_060920	FR799593.1	393688	393688	c.100C>T	p.Pro34Ser
LDBPK_060920	FR799593.1	393940	393940	c.352C>T	p.Arg118Cys
LDBPK_060920	FR799593.1	394003	394003	c.415G>A	p.Gly139Ser
LDBPK_060920	FR799593.1	394961	394961	c.1373C>G	p.Ala458Gly
LDBPK_060920	FR799593.1	394963	394963	c.1375A>G	p.Asn459Asp
LDBPK_060920	FR799593.1	394990	394990	c.1402C>T	p.Pro468Ser
LDBPK_060920	FR799593.1	395786	395786	c.2198C>T	p.Ala733Val
LDBPK_060930	FR799593.1	397648	397648	c.573C>A	p.His191Gln
LDBPK_060930	FR799593.1	397694	397694	c.619G>T	p.Asp207Tyr
LDBPK_060930	FR799593.1	398210	398210	c.1135T>C	p.Ser379Pro
LDBPK_060930	FR799593.1	398270	398270	c.1195A>C	p.Thr399Pro
LDBPK_060930	FR799593.1	399774	399774	c.2699T>C	p.Leu900Pro
LDBPK_060930	FR799593.1	399849	399849	c.2774T>C	p.Ile925Thr
LDBPK_060930	FR799593.1	399857	399857	c.2782G>C	p.Val928Leu
LDBPK_060930	FR799593.1	399904	399904	c.2829C>A	p.Phe943Leu
LDBPK_060930	FR799593.1	399942	399942	c.2867T>C	p.Leu956Pro
LDBPK_060930	FR799593.1	400046	400046	c.2971A>G	p.Thr991Ala
LDBPK_060930	FR799593.1	400457	400457	c.3382G>A	p.Gly1128Arg
LDBPK_060930	FR799593.1	400497	400497	c.3422A>G	p.Asp1141Gly
LDBPK_060930	FR799593.1	400787	400787	c.3712G>T	p.Val1238Leu
LDBPK_060930	FR799593.1	400961	400961	c.3886C>T	p.Arg1296Cys
LDBPK_060930	FR799593.1	401618	401618	c.4543C>T	p.Pro1515Ser
LDBPK_060930	FR799593.1	402176	402176	c.5101T>G	p.Ser1701Ala
LDBPK_060930	FR799593.1	402591	402591	c.5516C>T	p.Ala1839Val
LDBPK_060950	FR799593.1	405689	405689	c.800G>A	p.Cys267Tyr
LDBPK_060970	FR799593.1	413133	413133	c.986A>G	p.His329Arg
LDBPK_060970	FR799593.1	413291	413291	c.1144G>T	p.Ala382Ser
LDBPK_061000	FR799593.1	420563	420563	c.160C>T	p.Leu54Phe
LDBPK_061000	FR799593.1	421074	421074	c.671C>T	p.Pro224Leu
LDBPK_061000	FR799593.1	421466	421466	c.1063A>G	p.Lys355Glu
LDBPK_061000	FR799593.1	422133	422133	c.1730C>T	p.Ser577Phe
LDBPK_061000	FR799593.1	422359	422359	c.1956G>T	p.Gln652His
LDBPK_061000	FR799593.1	422360	422360	c.1957C>A	p.Pro653Thr
LDBPK_061000	FR799593.1	423993	423993	c.3590A>C	p.His1197Pro
LDBPK_061000	FR799593.1	424729	424729	c.4326C>A	p.Ser1442Arg
LDBPK_061000	FR799593.1	424761	424761	c.4358G>A	p.Arg1453His
LDBPK_061020	FR799593.1	432095	432095	c.218G>T	p.Gly73Val
LDBPK_061070	FR799593.1	444920	444920	c.157G>A	p.Ala53Thr
LDBPK_061130	FR799593.1	463350	463350	c.1645A>G	p.Arg549Gly
LDBPK_061150	FR799593.1	468772	468772	c.83C>A	p.Ala28Glu
LDBPK_061150	FR799593.1	468789	468789	c.100G>A	p.Val34Ile
LDBPK_061150	FR799593.1	468871	468871	c.182A>G	p.His61Arg
LDBPK_061150	FR799593.1	468905	468905	c.216T>G	p.Asn72Lys
LDBPK_061150	FR799593.1	469789	469789	c.1100A>G	p.Asn367Ser
LDBPK_061150	FR799593.1	469834	469834	c.1145G>T	p.Arg382Leu
LDBPK_061150	FR799593.1	469903	469903	c.1214G>A	p.Arg405Gln
LDBPK_061150	FR799593.1	470127	470127	c.1438C>T	p.Arg480Cys
LDBPK_061150	FR799593.1	470943	470943	c.2254T>G	p.Ser752Ala
LDBPK_061150	FR799593.1	471580	471580	c.2891T>C	p.Val964Ala
LDBPK_061150	FR799593.1	471582	471582	c.2893G>A	p.Gly965Ser
LDBPK_061150	FR799593.1	471706	471706	c.3017C>G	p.Pro1006Arg
LDBPK_061150	FR799593.1	471804	471804	c.3115T>C	p.Tyr1039His
LDBPK_061170	FR799593.1	477047	477047	c.775G>T	p.Ala259Ser
LDBPK_061180	FR799593.1	478242	478242	c.556C>T	p.Pro186Ser
LDBPK_061180	FR799593.1	479851	479851	c.2165T>C	p.Val722Ala
LDBPK_061190	FR799593.1	480394	480394	c.4G>T	p.Ala2Ser
LDBPK_061200	FR799593.1	482532	482532	c.22A>G	p.Thr8Ala
LDBPK_061200	FR799593.1	482997	482997	c.487T>C	p.Ser163Pro
LDBPK_061200	FR799593.1	483270	483270	c.760C>T	p.Pro254Ser
LDBPK_061200	FR799593.1	483570	483570	c.1060G>C	p.Val354Leu
LDBPK_061200	FR799593.1	483885	483885	c.1375A>C	p.Lys459Gln
LDBPK_061200	FR799593.1	484318	484318	c.1808A>C	p.Asn603Thr
LDBPK_061200	FR799593.1	484731	484731	c.2221C>T	p.His741Tyr
LDBPK_061200	FR799593.1	484737	484737	c.2227T>G	p.Cys743Gly
LDBPK_061200	FR799593.1	485158	485158	c.2648C>T	p.Thr883Ile
LDBPK_061200	FR799593.1	485356	485356	c.2846G>A	p.Arg949His
LDBPK_061200	FR799593.1	485718	485718	c.3208C>T	p.His1070Tyr
LDBPK_061220	FR799593.1	488045	488045	c.55T>G	p.Ser19Ala
LDBPK_061250	FR799593.1	494154	494154	c.62T>C	p.Leu21Pro
LDBPK_061250	FR799593.1	494995	494995	c.903A>C	p.Arg301Ser
LDBPK_061250	FR799593.1	495189	495189	c.1097C>T	p.Pro366Leu
LDBPK_061260	FR799593.1	496689	496689	c.824C>T	p.Ser275Phe
LDBPK_061270	FR799593.1	500294	500294	c.938A>G	p.Glu313Gly
LDBPK_061270	FR799593.1	501002	501002	c.1646G>A	p.Ser549Asn
LDBPK_061270	FR799593.1	501558	501558	c.2202G>C	p.Lys734Asn
LDBPK_061270	FR799593.1	501729	501729	c.2373C>G	p.His791Gln
LDBPK_061280	FR799593.1	502823	502823	c.10C>T	p.Pro4Ser
LDBPK_061280	FR799593.1	503367	503367	c.554T>C	p.Val185Ala
LDBPK_061280	FR799593.1	503411	503411	c.598A>G	p.Thr200Ala
LDBPK_061290	FR799593.1	504336	504336	c.26C>T	p.Pro9Leu
LDBPK_061290	FR799593.1	504353	504353	c.43G>T	p.Gly15Cys
LDBPK_061320	FR799593.1	512869	512869	c.854G>A	p.Arg285His
LDBPK_061340	FR799593.1	517713	517713	c.362T>C	p.Phe121Ser
LDBPK_061360	FR799593.1	525382	525382	c.271G>A	p.Val91Ile
LDBPK_061360	FR799593.1	525659	525659	c.548C>A	p.Thr183Asn
LDBPK_061360	FR799593.1	526013	526013	c.902A>C	p.Glu301Ala
LDBPK_061360	FR799593.1	526054	526054	c.943T>C	p.Ser315Pro
LDBPK_061360	FR799593.1	526691	526691	c.1580A>G	p.Gln527Arg
LDBPK_061360	FR799593.1	526745	526745	c.1634C>T	p.Ala545Val
LDBPK_061360	FR799593.1	526877	526877	c.1766A>G	p.Asp589Gly
LDBPK_061360	FR799593.1	526921	526921	c.1810A>G	p.Thr604Ala
LDBPK_061360	FR799593.1	527030	527030	c.1919C>A	p.Thr640Lys
LDBPK_070060	FR799594.1	18033	18033	c.157T>G	p.Leu53Val
LDBPK_070060	FR799594.1	19598	19598	c.1722G>C	p.Gln574His
LDBPK_070080	FR799594.1	29185	29185	c.199T>C	p.Tyr67His
LDBPK_070080	FR799594.1	30148	30148	c.1162G>A	p.Val388Ile
LDBPK_070080	FR799594.1	30221	30221	c.1235T>G	p.Phe412Cys
LDBPK_070080	FR799594.1	30299	30299	c.1313G>T	p.Ser438Ile
LDBPK_070080	FR799594.1	30368	30368	c.1382A>G	p.His461Arg
LDBPK_070080	FR799594.1	30443	30443	c.1457A>C	p.Asn486Thr
LDBPK_070080	FR799594.1	30452	30452	c.1466G>A	p.Arg489His
LDBPK_070080	FR799594.1	30611	30611	c.1625A>C	p.Glu542Ala
LDBPK_070080	FR799594.1	30746	30746	c.1760A>G	p.Gln587Arg
LDBPK_070090	FR799594.1	33258	33258	c.638A>C	p.Lys213Thr
LDBPK_070090	FR799594.1	34133	34133	c.1513A>G	p.Thr505Ala
LDBPK_070090	FR799594.1	34542	34542	c.1922T>C	p.Leu641Ser
LDBPK_070090	FR799594.1	35603	35603	c.2983A>G	p.Thr995Ala
LDBPK_070090	FR799594.1	35651	35651	c.3031C>A	p.Leu1011Met
LDBPK_070090	FR799594.1	37343	37343	c.4723C>T	p.Pro1575Ser
LDBPK_070090	FR799594.1	39006	39006	c.6386G>A	p.Gly2129Asp
LDBPK_070090	FR799594.1	39596	39596	c.6976A>G	p.Thr2326Ala
LDBPK_070090	FR799594.1	39672	39672	c.7052C>T	p.Ala2351Val
LDBPK_070090	FR799594.1	40238	40238	c.7618A>C	p.Ser2540Arg
LDBPK_070090	FR799594.1	40322	40322	c.7702G>A	p.Asp2568Asn
LDBPK_070090	FR799594.1	41504	41504	c.8884A>C	p.Asn2962His
LDBPK_070100	FR799594.1	47192	47192	c.2144G>C	p.Arg715Pro
LDBPK_070120	FR799594.1	56066	56066	c.1934A>G	p.Glu645Gly
LDBPK_070140	FR799594.1	63025	63025	c.1195G>A	p.Ala399Thr
LDBPK_070150	FR799594.1	64762	64762	c.79G>A	p.Val27Ile
LDBPK_070200	FR799594.1	74915	74915	c.1260G>C	p.Lys420Asn
LDBPK_070210	FR799594.1	76653	76653	c.67A>C	p.Ile23Leu
LDBPK_070230	FR799594.1	81336	81336	c.1333C>G	p.Leu445Val
LDBPK_070230	FR799594.1	81582	81582	c.1579A>C	p.Lys527Gln
LDBPK_070240	FR799594.1	84466	84466	c.1027C>T	p.Pro343Ser
LDBPK_070270	FR799594.1	100357	100357	c.2108C>T	p.Ala703Val
LDBPK_070270	FR799594.1	101196	101196	c.2947G>A	p.Ala983Thr
LDBPK_070270	FR799594.1	102045	102045	c.3796G>A	p.Val1266Met
LDBPK_070270	FR799594.1	102178	102178	c.3929A>G	p.Glu1310Gly
LDBPK_070270	FR799594.1	102181	102181	c.3932C>A	p.Thr1311Lys
LDBPK_070270	FR799594.1	103866	103866	c.5617A>G	p.Met1873Val
LDBPK_070280	FR799594.1	105951	105951	c.268G>T	p.Ala90Ser
LDBPK_070280	FR799594.1	106524	106524	c.841G>T	p.Gly281Cys
LDBPK_070280	FR799594.1	106951	106951	c.1268G>A	p.Arg423His
LDBPK_070280	FR799594.1	107512	107512	c.1829T>A	p.Leu610Gln
LDBPK_070310	FR799594.1	110025	110025	c.70C>T	p.Arg24Trp
LDBPK_070310	FR799594.1	111120	111120	c.1165C>G	p.Leu389Val
LDBPK_070320	FR799594.1	117445	117445	c.1208C>T	p.Thr403Ile
LDBPK_070330	FR799594.1	124891	124891	c.2272C>G	p.Leu758Val
LDBPK_070340	FR799594.1	130084	130084	c.4211C>T	p.Pro1404Leu
LDBPK_070340	FR799594.1	131392	131392	c.2903C>T	p.Pro968Leu
LDBPK_070340	FR799594.1	132677	132677	c.1618A>G	p.Asn540Asp
LDBPK_070340	FR799594.1	132979	132979	c.1316G>A	p.Gly439Glu
LDBPK_070340	FR799594.1	133834	133834	c.461A>G	p.Asp154Gly
LDBPK_070380	FR799594.1	144772	144772	c.566C>T	p.Thr189Ile
LDBPK_070400	FR799594.1	147142	147142	c.1710A>C	p.Glu570Asp
LDBPK_070400	FR799594.1	148223	148223	c.629T>C	p.Val210Ala
LDBPK_070410	FR799594.1	151507	151507	c.4208C>T	p.Thr1403Ile
LDBPK_070420	FR799594.1	159338	159338	c.155G>A	p.Ser52Asn
LDBPK_070440	FR799594.1	166973	166973	c.15328G>A	p.Ala5110Thr
LDBPK_070440	FR799594.1	167399	167399	c.14902G>A	p.Gly4968Ser
LDBPK_070440	FR799594.1	168470	168470	c.13831G>A	p.Ala4611Thr
LDBPK_070440	FR799594.1	170165	170165	c.12136T>G	p.Ser4046Ala
LDBPK_070440	FR799594.1	171131	171131	c.11170G>T	p.Val3724Phe
LDBPK_070440	FR799594.1	174478	174478	c.7823A>G	p.Glu2608Gly
LDBPK_070440	FR799594.1	174902	174902	c.7399A>G	p.Thr2467Ala
LDBPK_070440	FR799594.1	175438	175438	c.6863C>T	p.Thr2288Ile
LDBPK_070440	FR799594.1	177255	177255	c.5046G>T	p.Gln1682His
LDBPK_070440	FR799594.1	178678	178678	c.3623C>T	p.Pro1208Leu
LDBPK_070460	FR799594.1	187819	187819	c.2536T>G	p.Trp846Gly
LDBPK_070460	FR799594.1	188103	188103	c.2252T>C	p.Val751Ala
LDBPK_070460	FR799594.1	189180	189180	c.1175C>T	p.Thr392Ile
LDBPK_070460	FR799594.1	189499	189499	c.856G>A	p.Ala286Thr
LDBPK_070460	FR799594.1	189564	189564	c.791A>G	p.His264Arg
LDBPK_070460	FR799594.1	190218	190218	c.137T>C	p.Val46Ala
LDBPK_070470	FR799594.1	191872	191872	c.2171C>T	p.Ala724Val
LDBPK_070470	FR799594.1	192212	192212	c.1831G>A	p.Ala611Thr
LDBPK_070470	FR799594.1	192604	192604	c.1439A>G	p.His480Arg
LDBPK_070480	FR799594.1	196349	196349	c.2333C>A	p.Ala778Glu
LDBPK_070480	FR799594.1	196693	196693	c.1989G>T	p.Lys663Asn
LDBPK_070480	FR799594.1	196704	196704	c.1978T>C	p.Ser660Pro
LDBPK_070480	FR799594.1	197073	197073	c.1609G>A	p.Ala537Thr
LDBPK_070480	FR799594.1	197853	197853	c.829A>G	p.Ile277Val
LDBPK_070490	FR799594.1	200774	200774	c.1617C>G	p.His539Gln
LDBPK_070500	FR799594.1	203912	203912	c.1943C>G	p.Thr648Arg
LDBPK_070500	FR799594.1	205232	205232	c.623A>C	p.Gln208Pro
LDBPK_070530	FR799594.1	214239	214239	c.226G>T	p.Asp76Tyr
LDBPK_070530	FR799594.1	214329	214329	c.316C>T	p.Leu106Phe
LDBPK_070530	FR799594.1	216039	216039	c.2026G>A	p.Glu676Lys
LDBPK_070530	FR799594.1	216183	216183	c.2170G>A	p.Val724Ile
LDBPK_070530	FR799594.1	218682	218682	c.4669C>A	p.Pro1557Thr
LDBPK_070530	FR799594.1	219700	219700	c.5687G>A	p.Gly1896Glu
LDBPK_070530	FR799594.1	222805	222805	c.8792G>T	p.Arg2931Leu
LDBPK_070530	FR799594.1	223655	223655	c.9642A>C	p.Glu3214Asp
LDBPK_070530	FR799594.1	224368	224368	c.10355G>T	p.Trp3452Leu
LDBPK_070530	FR799594.1	224754	224754	c.10741A>G	p.Lys3581Glu
LDBPK_070530	FR799594.1	225144	225144	c.11131C>T	p.Leu3711Phe
LDBPK_070530	FR799594.1	225982	225982	c.11969A>G	p.His3990Arg
LDBPK_070530	FR799594.1	227259	227259	c.13246A>G	p.Thr4416Ala
LDBPK_070530	FR799594.1	227496	227496	c.13483T>C	p.Tyr4495His
LDBPK_070530	FR799594.1	227629	227629	c.13616G>A	p.Arg4539His
LDBPK_070530	FR799594.1	228534	228534	c.14521A>G	p.Thr4841Ala
LDBPK_070540	FR799594.1	230467	230467	c.31G>A	p.Ala11Thr
LDBPK_070550	FR799594.1	233830	233830	c.559C>T	p.Arg187Cys
LDBPK_070590	FR799594.1	243395	243395	c.1144G>A	p.Gly382Arg
LDBPK_070590	FR799594.1	243827	243827	c.1576C>T	p.Arg526Cys
LDBPK_070590	FR799594.1	244808	244808	c.2557C>T	p.Arg853Cys
LDBPK_070600	FR799594.1	252009	252009	c.356A>G	p.His119Arg
LDBPK_070600	FR799594.1	252020	252020	c.367G>A	p.Gly123Arg
LDBPK_070600	FR799594.1	252090	252090	c.437C>G	p.Thr146Ser
LDBPK_070600	FR799594.1	252569	252569	c.916G>T	p.Ala306Ser
LDBPK_070600	FR799594.1	253061	253061	c.1408G>T	p.Ala470Ser
LDBPK_070600	FR799594.1	254553	254553	c.2900C>T	p.Ser967Leu
LDBPK_070600	FR799594.1	254760	254760	c.3107C>T	p.Pro1036Leu
LDBPK_070600	FR799594.1	254796	254796	c.3143T>C	p.Val1048Ala
LDBPK_070600	FR799594.1	255479	255479	c.3826T>G	p.Ser1276Ala
LDBPK_070600	FR799594.1	256139	256139	c.4486C>A	p.Leu1496Ile
LDBPK_070600	FR799594.1	257339	257339	c.5686G>A	p.Val1896Ile
LDBPK_070620	FR799594.1	261204	261204	c.103C>T	p.Arg35Cys
LDBPK_070620	FR799594.1	261973	261973	c.872T>C	p.Val291Ala
LDBPK_070630	FR799594.1	264140	264140	c.658G>C	p.Ala220Pro
LDBPK_070630	FR799594.1	265196	265196	c.1714A>G	p.Ile572Val
LDBPK_070640	FR799594.1	268950	268950	c.772C>T	p.Pro258Ser
LDBPK_070640	FR799594.1	269056	269056	c.878A>G	p.Glu293Gly
LDBPK_070640	FR799594.1	269282	269282	c.1104T>G	p.His368Gln
LDBPK_070640	FR799594.1	269481	269481	c.1303C>A	p.Pro435Thr
LDBPK_070640	FR799594.1	269737	269737	c.1559C>T	p.Ala520Val
LDBPK_070640	FR799594.1	269794	269794	c.1616C>T	p.Ala539Val
LDBPK_070640	FR799594.1	270153	270153	c.1975A>G	p.Thr659Ala
LDBPK_070640	FR799594.1	270220	270220	c.2042C>T	p.Ala681Val
LDBPK_070640	FR799594.1	271111	271111	c.2933C>T	p.Ala978Val
LDBPK_070660	FR799594.1	275219	275219	c.314C>T	p.Thr105Met
LDBPK_070670	FR799594.1	278575	278575	c.571C>A	p.Leu191Ile
LDBPK_070680	FR799594.1	279664	279664	c.253G>A	p.Val85Ile
LDBPK_070690	FR799594.1	281612	281612	c.406G>A	p.Ala136Thr
LDBPK_070690	FR799594.1	282105	282105	c.899C>T	p.Pro300Leu
LDBPK_070690	FR799594.1	282360	282360	c.1154G>A	p.Arg385Lys
LDBPK_070690	FR799594.1	282452	282452	c.1246T>G	p.Ser416Ala
LDBPK_070690	FR799594.1	282462	282462	c.1256G>A	p.Gly419Asp
LDBPK_070690	FR799594.1	282690	282690	c.1484T>C	p.Leu495Ser
LDBPK_070700	FR799594.1	286558	286558	c.956G>C	p.Gly319Ala
LDBPK_070700	FR799594.1	286560	286560	c.958T>A	p.Phe320Ile
LDBPK_070700	FR799594.1	286568	286568	c.966G>C	p.Met322Ile
LDBPK_070700	FR799594.1	286573	286573	c.971A>G	p.Gln324Arg
LDBPK_070700	FR799594.1	286582	286582	c.980C>T	p.Ser327Leu
LDBPK_070700	FR799594.1	287593	287593	c.1991C>G	p.Pro664Arg
LDBPK_070700	FR799594.1	287599	287599	c.1997A>G	p.Tyr666Cys
LDBPK_070720	FR799594.1	293505	293505	c.45C>A	p.Asp15Glu
LDBPK_070720	FR799594.1	293641	293641	c.181C>G	p.Gln61Glu
LDBPK_070720	FR799594.1	293756	293756	c.296T>C	p.Val99Ala
LDBPK_070720	FR799594.1	293858	293858	c.398C>T	p.Ser133Phe
LDBPK_070720	FR799594.1	293944	293944	c.484A>G	p.Thr162Ala
LDBPK_070720	FR799594.1	294001	294001	c.541G>A	p.Val181Ile
LDBPK_070720	FR799594.1	294025	294025	c.565C>T	p.Arg189Cys
LDBPK_070720	FR799594.1	294101	294101	c.641T>A	p.Leu214Gln
LDBPK_070740	FR799594.1	300778	300778	c.313C>T	p.Pro105Ser
LDBPK_070740	FR799594.1	301656	301656	c.1191G>C	p.Met397Ile
LDBPK_070740	FR799594.1	301703	301703	c.1238T>C	p.Val413Ala
LDBPK_070740	FR799594.1	302006	302006	c.1541G>T	p.Gly514Val
LDBPK_070770	FR799594.1	308110	308110	c.639G>T	p.Met213Ile
LDBPK_070770	FR799594.1	308217	308217	c.746C>T	p.Pro249Leu
LDBPK_070770	FR799594.1	308403	308403	c.932C>T	p.Thr311Ile
LDBPK_070770	FR799594.1	308517	308517	c.1046C>A	p.Thr349Asn
LDBPK_070770	FR799594.1	308582	308582	c.1111A>G	p.Ser371Gly
LDBPK_070770	FR799594.1	309006	309006	c.1535G>C	p.Cys512Ser
LDBPK_070770	FR799594.1	309042	309042	c.1571A>G	p.Glu524Gly
LDBPK_070770	FR799594.1	309297	309297	c.1826A>G	p.Glu609Gly
LDBPK_070770	FR799594.1	310763	310763	c.3292G>A	p.Gly1098Ser
LDBPK_070770	FR799594.1	312159	312159	c.4688C>A	p.Pro1563His
LDBPK_070770	FR799594.1	312440	312440	c.4969G>C	p.Val1657Leu
LDBPK_070780	FR799594.1	316679	316679	c.1667T>C	p.Val556Ala
LDBPK_070780	FR799594.1	317315	317315	c.2303A>C	p.Lys768Thr
LDBPK_070780	FR799594.1	317480	317480	c.2468G>C	p.Arg823Pro
LDBPK_070800	FR799594.1	321624	321624	c.967G>T	p.Ala323Ser
LDBPK_070810	FR799594.1	326540	326540	c.2013G>T	p.Lys671Asn
LDBPK_070810	FR799594.1	327379	327379	c.2852T>C	p.Leu951Pro
LDBPK_070810	FR799594.1	327738	327738	c.3211A>G	p.Ser1071Gly
LDBPK_070810	FR799594.1	327764	327764	c.3237A>C	p.Glu1079Asp
LDBPK_070830	FR799594.1	335404	335404	c.331A>G	p.Asn111Asp
LDBPK_070830	FR799594.1	341863	341863	c.6790A>G	p.Thr2264Ala
LDBPK_070830	FR799594.1	341977	341977	c.6904A>G	p.Arg2302Gly
LDBPK_070830	FR799594.1	342665	342665	c.7592C>T	p.Ala2531Val
LDBPK_070830	FR799594.1	344584	344584	c.9511G>A	p.Gly3171Ser
LDBPK_070830	FR799594.1	344849	344849	c.9776A>G	p.Asp3259Gly
LDBPK_070830	FR799594.1	345485	345485	c.10412T>G	p.Ile3471Ser
LDBPK_070830	FR799594.1	345674	345674	c.10601A>G	p.Tyr3534Cys
LDBPK_070860	FR799594.1	356244	356244	c.98A>G	p.Asp33Gly
LDBPK_070860	FR799594.1	356762	356762	c.616C>T	p.Pro206Ser
LDBPK_070860	FR799594.1	356971	356971	c.825A>G	p.Ile275Met
LDBPK_070870	FR799594.1	358421	358421	c.160A>G	p.Ser54Gly
LDBPK_070870	FR799594.1	358601	358601	c.340T>G	p.Ser114Ala
LDBPK_070870	FR799594.1	359490	359490	c.1229A>C	p.Asp410Ala
LDBPK_070870	FR799594.1	359931	359931	c.1670G>T	p.Cys557Phe
LDBPK_070870	FR799594.1	361116	361116	c.2855C>T	p.Ala952Val
LDBPK_070870	FR799594.1	361529	361529	c.3268G>A	p.Gly1090Ser
LDBPK_070880	FR799594.1	365614	365614	c.188G>C	p.Arg63Pro
LDBPK_070880	FR799594.1	365698	365698	c.272C>T	p.Ser91Phe
LDBPK_070880	FR799594.1	366295	366295	c.869G>C	p.Gly290Ala
LDBPK_070890	FR799594.1	370282	370282	c.296C>T	p.Ser99Leu
LDBPK_070890	FR799594.1	371373	371373	c.1387G>T	p.Val463Leu
LDBPK_070890	FR799594.1	371638	371638	c.1652T>C	p.Val551Ala
LDBPK_070890	FR799594.1	371676	371676	c.1690A>G	p.Ile564Val
LDBPK_070900	FR799594.1	372753	372753	c.140C>A	p.Pro47Gln
LDBPK_070900	FR799594.1	373327	373327	c.714C>A	p.Asp238Glu
LDBPK_070920	FR799594.1	380950	380950	c.422C>T	p.Ala141Val
LDBPK_070950	FR799594.1	390777	390777	c.1171C>G	p.Leu391Val
LDBPK_070950	FR799594.1	392298	392298	c.2692G>A	p.Ala898Thr
LDBPK_070970	FR799594.1	399911	399911	c.526T>G	p.Ser176Ala
LDBPK_070970	FR799594.1	400212	400212	c.827C>G	p.Ala276Gly
LDBPK_070970	FR799594.1	400217	400217	c.832T>C	p.Phe278Leu
LDBPK_070970	FR799594.1	400863	400863	c.1478G>A	p.Gly493Asp
LDBPK_070970	FR799594.1	400901	400901	c.1516G>A	p.Ala506Thr
LDBPK_070970	FR799594.1	400947	400947	c.1562C>A	p.Ala521Glu
LDBPK_070970	FR799594.1	401172	401172	c.1787G>A	p.Gly596Asp
LDBPK_071000	FR799594.1	425369	425369	c.149A>T	p.Gln50Leu
LDBPK_071000	FR799594.1	425722	425722	c.502G>T	p.Ala168Ser
LDBPK_071010	FR799594.1	436268	436268	c.949G>C	p.Val317Leu
LDBPK_071010	FR799594.1	436419	436419	c.1100C>A	p.Pro367Gln
LDBPK_071010	FR799594.1	437652	437652	c.2333T>C	p.Phe778Ser
LDBPK_071050	FR799594.1	458906	458906	c.166A>G	p.Lys56Glu
LDBPK_071050	FR799594.1	459453	459453	c.713G>A	p.Gly238Asp
LDBPK_071050	FR799594.1	459542	459542	c.802T>G	p.Ser268Ala
LDBPK_071050	FR799594.1	459615	459615	c.875G>T	p.Gly292Val
LDBPK_071050	FR799594.1	459829	459829	c.1089C>A	p.Ser363Arg
LDBPK_071050	FR799594.1	459863	459863	c.1123C>T	p.Pro375Ser
LDBPK_071050	FR799594.1	459914	459914	c.1174C>G	p.Arg392Gly
LDBPK_071050	FR799594.1	460028	460028	c.1288G>A	p.Ala430Thr
LDBPK_071050	FR799594.1	460049	460049	c.1309A>G	p.Asn437Asp
LDBPK_071050	FR799594.1	460143	460143	c.1403T>C	p.Val468Ala
LDBPK_071050	FR799594.1	460611	460611	c.1871T>C	p.Met624Thr
LDBPK_071050	FR799594.1	460701	460701	c.1961A>T	p.Glu654Val
LDBPK_071050	FR799594.1	460952	460952	c.2212A>G	p.Ser738Gly
LDBPK_071050	FR799594.1	461126	461126	c.2386T>C	p.Cys796Arg
LDBPK_071050	FR799594.1	461399	461399	c.2659G>A	p.Ala887Thr
LDBPK_071050	FR799594.1	461402	461402	c.2662G>A	p.Ala888Thr
LDBPK_071050	FR799594.1	461615	461615	c.2875A>G	p.Arg959Gly
LDBPK_071050	FR799594.1	461718	461718	c.2978A>G	p.Asp993Gly
LDBPK_071050	FR799594.1	462311	462311	c.3571G>A	p.Ala1191Thr
LDBPK_071050	FR799594.1	462336	462336	c.3596T>G	p.Val1199Gly
LDBPK_071060	FR799594.1	469434	469434	c.1004T>C	p.Val335Ala
LDBPK_071060	FR799594.1	469971	469971	c.1541A>G	p.Asp514Gly
LDBPK_071060	FR799594.1	470159	470159	c.1729C>T	p.Pro577Ser
LDBPK_071040	FR799594.1	473223	473223	c.146C>A	p.Pro49Gln
LDBPK_071040	FR799594.1	473471	473471	c.394C>T	p.Pro132Ser
LDBPK_071040	FR799594.1	473933	473933	c.856T>C	p.Ser286Pro
LDBPK_071040	FR799594.1	474015	474015	c.938C>G	p.Ala313Gly
LDBPK_071040	FR799594.1	474093	474093	c.1016T>G	p.Val339Gly
LDBPK_071040	FR799594.1	474222	474222	c.1145C>T	p.Ala382Val
LDBPK_071040	FR799594.1	474455	474455	c.1378T>G	p.Ser460Ala
LDBPK_071040	FR799594.1	474861	474861	c.1784C>G	p.Thr595Arg
LDBPK_071040	FR799594.1	475368	475368	c.2291C>T	p.Ala764Val
LDBPK_071040	FR799594.1	475439	475439	c.2362T>C	p.Trp788Arg
LDBPK_071040	FR799594.1	475449	475449	c.2372T>C	p.Leu791Ser
LDBPK_071040	FR799594.1	475523	475523	c.2446G>T	p.Ala816Ser
LDBPK_071040	FR799594.1	477111	477111	c.4034G>A	p.Arg1345His
LDBPK_071070	FR799594.1	482095	482095	c.505A>G	p.Thr169Ala
LDBPK_071070	FR799594.1	482099	482099	c.509C>A	p.Thr170Asn
LDBPK_071070	FR799594.1	484060	484060	c.2470G>A	p.Val824Met
LDBPK_071070	FR799594.1	484718	484718	c.3128T>G	p.Val1043Gly
LDBPK_071070	FR799594.1	485074	485074	c.3484G>C	p.Val1162Leu
LDBPK_071070	FR799594.1	485081	485081	c.3491C>G	p.Ala1164Gly
LDBPK_071070	FR799594.1	485308	485308	c.3718A>G	p.Thr1240Ala
LDBPK_071070	FR799594.1	485344	485344	c.3754G>A	p.Ala1252Thr
LDBPK_071070	FR799594.1	485786	485786	c.4196A>G	p.Gln1399Arg
LDBPK_071070	FR799594.1	485870	485870	c.4280C>T	p.Ser1427Phe
LDBPK_071070	FR799594.1	485995	485995	c.4405G>A	p.Ala1469Thr
LDBPK_071070	FR799594.1	486770	486770	c.5180T>C	p.Leu1727Ser
LDBPK_071070	FR799594.1	486820	486820	c.5230C>A	p.Pro1744Thr
LDBPK_071070	FR799594.1	487165	487165	c.5575G>A	p.Ala1859Thr
LDBPK_071070	FR799594.1	487277	487277	c.5687T>C	p.Val1896Ala
LDBPK_071070	FR799594.1	487510	487510	c.5920G>A	p.Ala1974Thr
LDBPK_071070	FR799594.1	487726	487726	c.6136G>A	p.Asp2046Asn
LDBPK_071080	FR799594.1	490599	490599	c.557T>G	p.Phe186Cys
LDBPK_071080	FR799594.1	490847	490847	c.805A>G	p.Thr269Ala
LDBPK_071090	FR799594.1	493566	493566	c.562G>C	p.Val188Leu
LDBPK_071100	FR799594.1	506595	506595	c.3857G>A	p.Gly1286Asp
LDBPK_071200	FR799594.1	515485	515485	c.316G>T	p.Ala106Ser
LDBPK_071210	FR799594.1	517583	517583	c.443A>T	p.Asp148Val
LDBPK_071210	FR799594.1	519449	519449	c.2309C>T	p.Pro770Leu
LDBPK_071220	FR799594.1	522886	522886	c.128C>T	p.Ala43Val
LDBPK_071240	FR799594.1	526715	526715	c.626T>C	p.Val209Ala
LDBPK_071250	FR799594.1	529257	529257	c.294G>T	p.Lys98Asn
LDBPK_071250	FR799594.1	529720	529720	c.757A>G	p.Ile253Val
LDBPK_071250	FR799594.1	530137	530137	c.1174C>A	p.Leu392Met
LDBPK_071250	FR799594.1	530368	530368	c.1405C>A	p.Leu469Met
LDBPK_071250	FR799594.1	530758	530758	c.1795T>C	p.Ser599Pro
LDBPK_071250	FR799594.1	531059	531059	c.2096G>A	p.Gly699Glu
LDBPK_071150	FR799594.1	536268	536268	c.988G>A	p.Gly330Ser
LDBPK_071170	FR799594.1	540169	540169	c.397G>C	p.Asp133His
LDBPK_071170	FR799594.1	540471	540471	c.699C>G	p.Asp233Glu
LDBPK_071170	FR799594.1	541205	541205	c.1433G>A	p.Gly478Asp
LDBPK_071170	FR799594.1	541312	541312	c.1540G>A	p.Ala514Thr
LDBPK_071170	FR799594.1	541360	541360	c.1588C>T	p.Arg530Trp
LDBPK_071170	FR799594.1	542609	542609	c.2837C>T	p.Pro946Leu
LDBPK_071260	FR799594.1	568333	568333	c.17T>C	p.Val6Ala
LDBPK_071260	FR799594.1	568806	568806	c.490A>G	p.Ile164Val
LDBPK_071260	FR799594.1	568993	568993	c.677T>A	p.Ile226Asn
LDBPK_071260	FR799594.1	569295	569295	c.979G>A	p.Glu327Lys
LDBPK_071270	FR799594.1	571647	571647	c.521T>C	p.Leu174Pro
LDBPK_071270	FR799594.1	571886	571886	c.760G>A	p.Gly254Ser
LDBPK_071280	FR799594.1	572434	572434	c.47C>T	p.Ser16Leu
LDBPK_071280	FR799594.1	572755	572755	c.368G>A	p.Ser123Asn
LDBPK_071290	FR799594.1	576020	576020	c.791G>A	p.Arg264His
LDBPK_071290	FR799594.1	576265	576265	c.1036A>T	p.Ser346Cys
LDBPK_071300	FR799594.1	579579	579579	c.866C>T	p.Ala289Val
LDBPK_071310	FR799594.1	582380	582380	c.380C>T	p.Ala127Val
LDBPK_071310	FR799594.1	582400	582400	c.400C>T	p.Pro134Ser
LDBPK_071310	FR799594.1	582919	582919	c.919C>A	p.Leu307Met
LDBPK_071310	FR799594.1	583455	583455	c.1455C>G	p.Asp485Glu
LDBPK_071320	FR799594.1	584721	584721	c.142T>C	p.Ser48Pro
LDBPK_071330	FR799594.1	591034	591034	c.2660T>C	p.Val887Ala
LDBPK_071330	FR799594.1	593328	593328	c.4954T>G	p.Ser1652Ala
LDBPK_071330	FR799594.1	594625	594625	c.6251C>T	p.Ala2084Val
LDBPK_071330	FR799594.1	595198	595198	c.6824C>T	p.Ser2275Leu
LDBPK_071340	FR799594.1	596907	596907	c.115G>A	p.Gly39Ser
LDBPK_071340	FR799594.1	597210	597210	c.418A>G	p.Ile140Val
LDBPK_080010	FR799595.2	4173	4173	c.1048A>G	p.Lys350Glu
LDBPK_080010	FR799595.2	4581	4581	c.1456G>A	p.Val486Met
LDBPK_080010	FR799595.2	4692	4692	c.1567A>T	p.Met523Leu
LDBPK_080010	FR799595.2	4995	4995	c.1870A>G	p.Thr624Ala
LDBPK_080020	FR799595.2	7900	7900	c.171G>C	p.Leu57Phe
LDBPK_080020	FR799595.2	8376	8376	c.647A>C	p.Asp216Ala
LDBPK_080030	FR799595.2	9786	9786	c.203G>C	p.Gly68Ala
LDBPK_080040	FR799595.2	12207	12207	c.223G>A	p.Asp75Asn
LDBPK_080060	FR799595.2	15570	15570	c.31C>G	p.Gln11Glu
LDBPK_080060	FR799595.2	16035	16035	c.496G>T	p.Val166Leu
LDBPK_080070	FR799595.2	16925	16925	c.220G>T	p.Ala74Ser
LDBPK_080070	FR799595.2	18294	18294	c.1589T>C	p.Ile530Thr
LDBPK_080080	FR799595.2	20117	20117	c.85C>A	p.Leu29Met
LDBPK_080080	FR799595.2	21105	21105	c.1073C>A	p.Pro358Gln
LDBPK_080080	FR799595.2	21434	21434	c.1402C>T	p.Arg468Cys
LDBPK_080090	FR799595.2	23594	23594	c.262G>T	p.Ala88Ser
LDBPK_080090	FR799595.2	25808	25808	c.2476G>A	p.Ala826Thr
LDBPK_080090	FR799595.2	26525	26525	c.3193G>A	p.Ala1065Thr
LDBPK_080100	FR799595.2	29429	29429	c.782C>T	p.Ala261Val
LDBPK_080110	FR799595.2	31449	31449	c.411C>A	p.His137Gln
LDBPK_080110	FR799595.2	32801	32801	c.1763A>G	p.His588Arg
LDBPK_080120	FR799595.2	36277	36277	c.296C>G	p.Thr99Ser
[truncated: 15,691 more rows]

## Sheet: Supplementary table 4_variants_
gene id	genotype	variant (nt)	variant (aa)	variant type	variant effect	samples
LDBPK_020010	2023-01-01	c.79T>C	p.Ser27Pro	missense_variant	MODERATE	31
LDBPK_020150	2023-01-01	c.310A>G	p.Lys104Glu	missense_variant	MODERATE	31
LDBPK_020150	2023-01-01	c.74G>A	p.Gly25Asp	missense_variant	MODERATE	31
LDBPK_020150	2023-01-01	c.76G>A	p.Val26Met	missense_variant	MODERATE	31
LDBPK_020660		c.*2649C>A		downstream_gene_variant	MODIFIER	31
LDBPK_020660	2023-01-01	c.592G>A	p.Val198Ile	missense_variant	MODERATE	31
LDBPK_020660	2023-01-01	c.628C>A	p.Gln210Lys	missense_variant	MODERATE	31
LDBPK_020660		c.*2232T>C		downstream_gene_variant	MODIFIER	31
LDBPK_020660		c.*3004A>G		downstream_gene_variant	MODIFIER	31
LDBPK_020660	2023-01-01	c.58A>G	p.Asn20Asp	missense_variant	MODERATE	31
LDBPK_020660	2023-01-01	c.718A>G	p.Asn240Asp	missense_variant	MODERATE	31
LDBPK_020670	2023-01-01	c.1862C>A	p.Ala621Asp	missense_variant	MODERATE	31
LDBPK_020670		c.-1525C>A		upstream_gene_variant	MODIFIER	31
LDBPK_020670		c.-1561G>A		upstream_gene_variant	MODIFIER	31
LDBPK_020670		c.1445T>C	p.Val482Ala	missense_variant	MODERATE	31
LDBPK_020670		c.-2021T>C		upstream_gene_variant	MODIFIER	31
LDBPK_020670		c.*3642A>G		downstream_gene_variant	MODIFIER	31
LDBPK_020670		c.*4188C>G		downstream_gene_variant	MODIFIER	31
LDBPK_020670		c.-1435A>G		upstream_gene_variant	MODIFIER	31
LDBPK_020670		c.-2095A>G		upstream_gene_variant	MODIFIER	31
LDBPK_020670		c.-2135C>T		upstream_gene_variant	MODIFIER	31
LDBPK_020680		c.*2807G>A		downstream_gene_variant	MODIFIER	31
LDBPK_020680		c.-3077C>A		upstream_gene_variant	MODIFIER	31
LDBPK_020680		c.-3494T>C		upstream_gene_variant	MODIFIER	31
LDBPK_020680		c.-2722A>G		upstream_gene_variant	MODIFIER	31
LDBPK_020700	2023-01-01	c.305G>A	p.Arg102His	missense_variant	MODERATE	31
LDBPK_020700		c.-2893C>G		upstream_gene_variant	MODIFIER	31
LDBPK_020700		c.-3439A>G		upstream_gene_variant	MODIFIER	31
LDBPK_044340	2023-01-01	c.334G>A	p.Ala112Thr	missense_variant	MODERATE	31
LDBPK_044340	2023-01-01	c.248T>C	p.Val83Ala	missense_variant	MODERATE	31
LDBPK_060410	2023-01-01	c.631T>C	p.Ser211Pro	missense_variant	MODERATE	31
LDBPK_061360	2023-01-01	c.1210G>A	p.Asp404Asn	missense_variant	MODERATE	31
LDBPK_061360	2023-01-01	c.1768G>A	p.Ala590Thr	missense_variant	MODERATE	31
LDBPK_061360	2023-01-01	c.254G>A	p.Ser85Asn	missense_variant	MODERATE	31
LDBPK_061360	2023-01-01	c.882A>C	p.Gln294His	missense_variant	MODERATE	31
LDBPK_061360	2023-01-01	c.1744C>G	p.Pro582Ala	missense_variant	MODERATE	31
LDBPK_061360	2023-01-01	c.676C>G	p.Arg226Gly	missense_variant	MODERATE	31
LDBPK_070950	2023-01-01	c.3220C>G	p.Pro1074Ala	missense_variant	MODERATE	31
LDBPK_070950	2023-01-01	c.3241A>G	p.Lys1081Glu	missense_variant	MODERATE	31
LDBPK_073400	2023-01-01	c.40C>T	p.Leu14Phe	missense_variant	MODERATE	31
LDBPK_080960	2023-01-01	c.497C>T	p.Ala166Val	missense_variant	MODERATE	31
LDBPK_080960	2023-01-01	c.710A>G	p.Gln237Arg	missense_variant	MODERATE	31
LDBPK_080960	2023-01-01	c.59C>A	p.Ala20Asp	missense_variant	MODERATE	31
LDBPK_081130	2023-01-01	c.1162C>T	p.Arg388Cys	missense_variant	MODERATE	31
LDBPK_081680	2023-01-01	c.683A>T	p.Tyr228Phe	missense_variant	MODERATE	31
LDBPK_100521	2023-01-01	c.70G>A	p.Gly24Arg	missense_variant	MODERATE	31
LDBPK_101440	2023-01-01	c.826A>G	p.Lys276Glu	missense_variant	MODERATE	31
LDBPK_101440	2023-01-01	c.838A>G	p.Asn280Asp	missense_variant	MODERATE	31
LDBPK_111210	2023-01-01	c.2623G>A	p.Ala875Thr	missense_variant	MODERATE	31
LDBPK_111210	2023-01-01	c.469C>A	p.Arg157Ser	missense_variant	MODERATE	31
LDBPK_111210	2023-01-01	c.584C>A		missense_variant	MODERATE	31
LDBPK_111210	2023-01-01	c.1514T>C	p.Val505Ala	missense_variant	MODERATE	31
LDBPK_111210	2023-01-01	c.570A>C	p.Leu190Phe	missense_variant	MODERATE	31
LDBPK_111210	2023-01-01	c.2824A>G	p.Arg942Gly	missense_variant	MODERATE	31
LDBPK_111210	2023-01-01	c.613A>G	p.Thr205Ala	missense_variant	MODERATE	31
LDBPK_111210	2023-01-01	c.2822C>T	p.Thr941Ile	missense_variant	MODERATE	31
LDBPK_111210	2023-01-01	c.467G>T	p.Arg156Leu	missense_variant	MODERATE	31
LDBPK_111210	2023-01-01	c.550C>T	p.His184Tyr	missense_variant	MODERATE	31
LDBPK_120661	2023-01-01	c.845G>A	p.Arg282Lys	missense_variant	MODERATE	31
LDBPK_120661	2023-01-01	c.476A>G	p.Asp159Gly	missense_variant	MODERATE	31
LDBPK_130330	2023-01-01	c.124A>G	p.Ile42Val	missense_variant	MODERATE	31
LDBPK_140400	2023-01-01	c.166G>A	p.Ala56Thr	missense_variant	MODERATE	31
LDBPK_140400	2023-01-01	c.178A>T	p.Ser60Cys	missense_variant	MODERATE	31
LDBPK_140500	2023-01-01	c.416T>C	p.Leu139Ser	missense_variant	MODERATE	31
LDBPK_151140	2023-01-01	c.146C>G	p.Thr49Ser	missense_variant	MODERATE	31
LDBPK_151140	2023-01-01	c.172G>C	p.Ala58Pro	missense_variant	MODERATE	31
LDBPK_151140	2023-01-01	c.115G>A	p.Val39Ile	missense_variant	MODERATE	31
LDBPK_151140	2023-01-01	c.173C>A	p.Ala58Glu	missense_variant	MODERATE	31
LDBPK_151230	2023-01-01	c.478A>G	p.Thr160Ala	missense_variant	MODERATE	31
LDBPK_151540	2023-01-01	c.1637A>G	p.Gln546Arg	missense_variant	MODERATE	31
LDBPK_151540	2023-01-01	c.1648A>C	p.Lys550Gln	missense_variant	MODERATE	31
LDBPK_151540	2023-01-01	c.1045G>A	p.Val349Ile	missense_variant	MODERATE	31
LDBPK_160450	2023-01-01	c.451G>A	p.Ala151Thr	missense_variant	MODERATE	31
LDBPK_170130	2023-01-01	c.2355T>G	p.Ile785Met	missense_variant	MODERATE	31
LDBPK_170130	2023-01-01	c.2377G>C	p.Val793Leu	missense_variant	MODERATE	31
LDBPK_170140	2023-01-01	c.926T>C	p.Val309Ala	missense_variant	MODERATE	31
LDBPK_171590	2023-01-01	c.146C>G	p.Ser49Cys	missense_variant	MODERATE	31
LDBPK_180700	2023-01-01	c.575T>C	p.Val192Ala	missense_variant	MODERATE	31
LDBPK_180700	2023-01-01	c.666A>C	p.Lys222Asn	missense_variant	MODERATE	31
LDBPK_190140	2023-01-01	c.521T>C	p.Leu174Ser	missense_variant	MODERATE	31
LDBPK_190570	2023-01-01	c.911A>G	p.Gln304Arg	missense_variant	MODERATE	31
LDBPK_190850	2023-01-01	c.121C>T	p.Pro41Ser	missense_variant	MODERATE	31
LDBPK_190940	2023-01-01	c.1237G>A	p.Ala413Thr	missense_variant	MODERATE	31
LDBPK_191690	2023-01-01	c.559G>A	p.Ala187Thr	missense_variant	MODERATE	31
LDBPK_191690	2023-01-01	c.481T>G	p.Ser161Ala	missense_variant	MODERATE	31
LDBPK_220560	2023-01-01	c.1431G>T	p.Gln477His	missense_variant	MODERATE	31
LDBPK_220560	2023-01-01	c.1478G>T	p.Ser493Ile	missense_variant	MODERATE	31
LDBPK_220560	2023-01-01	c.1834A>G	p.Ile612Val	missense_variant	MODERATE	31
LDBPK_220560	2023-01-01	c.1804T>C	p.Ser602Pro	missense_variant	MODERATE	31
LDBPK_220560	2023-01-01	c.533T>C	p.Leu178Pro	missense_variant	MODERATE	31
LDBPK_220560	2023-01-01	c.508G>A	p.Ala170Thr	missense_variant	MODERATE	31
LDBPK_220560	2023-01-01	c.649G>A	p.Ala217Thr	missense_variant	MODERATE	31
LDBPK_220660	2023-01-01	c.3107T>C	p.Met1036Thr	missense_variant	MODERATE	31
LDBPK_220660	2023-01-01	c.2579C>T	p.Pro860Leu	missense_variant	MODERATE	31
LDBPK_240440	2023-01-01	c.1294G>A	p.Asp432Asn	missense_variant	MODERATE	31
LDBPK_240440	2023-01-01	c.1289T>C	p.Val430Ala	missense_variant	MODERATE	31
LDBPK_251030	2023-01-01	c.662C>A	p.Ala221Glu	missense_variant	MODERATE	31
LDBPK_251030	2023-01-01	c.407A>G	p.Asn136Ser	missense_variant	MODERATE	31
LDBPK_251030	2023-01-01	c.421C>G	p.Gln141Glu	missense_variant	MODERATE	31
LDBPK_260160	2023-01-01	c.515A>G	p.Lys172Arg	missense_variant	MODERATE	31
LDBPK_270840	2023-01-01	c.4319G>T	p.Trp1440Leu	missense_variant	MODERATE	31
LDBPK_270840	2023-01-01	c.4320G>T	p.Trp1440Cys	missense_variant	MODERATE	31
LDBPK_270840	2023-01-01	c.3979A>G	p.Ile1327Val	missense_variant	MODERATE	31
LDBPK_270840	2023-01-01	c.4220T>C	p.Val1407Ala	missense_variant	MODERATE	31
LDBPK_272520	2023-01-01	c.1541T>A	p.Phe514Tyr	missense_variant	MODERATE	31
LDBPK_272520	2023-01-01	c.1901A>G	p.Lys634Arg	missense_variant	MODERATE	31
LDBPK_272520	2023-01-01	c.1484C>T	p.Thr495Met	missense_variant	MODERATE	31
LDBPK_272680	2023-01-01	c.994T>G	p.Ser332Ala	missense_variant	MODERATE	31
LDBPK_302480	2023-01-01	c.1002G>T	p.Glu334Asp	missense_variant	MODERATE	31
LDBPK_302480	2023-01-01	c.956A>G	p.His319Arg	missense_variant	MODERATE	31
LDBPK_303560	2023-01-01	c.401G>A	p.Gly134Glu	missense_variant	MODERATE	31
LDBPK_310340	2023-01-01	c.32A>G	p.His11Arg	missense_variant	MODERATE	31
LDBPK_310340	2023-01-01	c.409T>C	p.Phe137Leu	missense_variant	MODERATE	31
LDBPK_310340	2023-01-01	c.71T>C	p.Phe24Ser	missense_variant	MODERATE	31
LDBPK_310340	2023-01-01	c.92T>C	p.Leu31Pro	missense_variant	MODERATE	31
LDBPK_310950	2023-01-01	c.866C>T	p.Ala289Val	missense_variant	MODERATE	31
LDBPK_310950	2023-01-01	c.877G>T	p.Gly293Cys	missense_variant	MODERATE	31
LDBPK_310950	2023-01-01	c.934C>T	p.His312Tyr	missense_variant	MODERATE	31
LDBPK_310950	2023-01-01	c.1330T>G	p.Leu444Val	missense_variant	MODERATE	31
LDBPK_310950	2023-01-01	c.1302G>C	p.Lys434Asn	missense_variant	MODERATE	31
LDBPK_310950	2023-01-01	c.1316G>A	p.Ser439Asn	missense_variant	MODERATE	31
LDBPK_310950	2023-01-01	c.868G>A	p.Asp290Asn	missense_variant	MODERATE	31
LDBPK_311470	2023-01-01	c.385A>G	p.Ile129Val	missense_variant	MODERATE	31
LDBPK_311470	2023-01-01	c.387C>G	p.Ile129Met	missense_variant	MODERATE	31
LDBPK_311470	2023-01-01	c.388A>G	p.Asn130Asp	missense_variant	MODERATE	31
LDBPK_311470	2023-01-01	c.403A>G	p.Thr135Ala	missense_variant	MODERATE	31
LDBPK_311470	2023-01-01	c.396C>A	p.Phe132Leu	missense_variant	MODERATE	31
LDBPK_311850	2023-01-01	c.415C>G	p.Leu139Val	missense_variant	MODERATE	31
LDBPK_311920	2023-01-01	c.1540C>G	p.Arg514Gly	missense_variant	MODERATE	31
LDBPK_311920	2023-01-01	c.1909A>G	p.Ser637Gly	missense_variant	MODERATE	31
LDBPK_311920	2023-01-01	c.2021A>G	p.His674Arg	missense_variant	MODERATE	31
LDBPK_311920	2023-01-01	c.2036A>G	p.Glu679Gly	missense_variant	MODERATE	31
LDBPK_311920	2023-01-01	c.2026T>C	p.Tyr676His	missense_variant	MODERATE	31
LDBPK_311920	2023-01-01	c.1910G>A	p.Ser637Asn	missense_variant	MODERATE	31
LDBPK_311920	2023-01-01	c.2158G>A	p.Ala720Thr	missense_variant	MODERATE	31
LDBPK_340710	2023-01-01	c.1595C>T	p.Ala532Val	missense_variant	MODERATE	31
LDBPK_340710	2023-01-01	c.1606G>T	p.Val536Phe	missense_variant	MODERATE	31
LDBPK_340710	2023-01-01	c.1576C>G	p.Pro526Ala	missense_variant	MODERATE	31
LDBPK_340710	2023-01-01	c.1584C>G	p.His528Gln	missense_variant	MODERATE	31
LDBPK_340710	2023-01-01	c.1603G>C	p.Ala535Pro	missense_variant	MODERATE	31
LDBPK_340710	2023-01-01	c.1632G>C	p.Glu544Asp	missense_variant	MODERATE	31
LDBPK_340710	2023-01-01	c.1534G>A	p.Val512Ile	missense_variant	MODERATE	31
LDBPK_340710	2023-01-01	c.1591C>A	p.Pro531Thr	missense_variant	MODERATE	31
LDBPK_341010	2023-01-01	c.85G>A	p.Val29Met	missense_variant	MODERATE	31
LDBPK_341010	2023-01-01	c.79A>C	p.Ile27Leu	missense_variant	MODERATE	31
LDBPK_341150	2023-01-01	c.361A>T	p.Thr121Ser	missense_variant	MODERATE	31
LDBPK_341150	2023-01-01	c.190C>G	p.Gln64Glu	missense_variant	MODERATE	31
LDBPK_341150	2023-01-01	c.193T>G	p.Leu65Val	missense_variant	MODERATE	31
LDBPK_341150	2023-01-01	c.182C>A	p.Thr61Lys	missense_variant	MODERATE	31
LDBPK_341150	2023-01-01	c.199G>A	p.Ala67Thr	missense_variant	MODERATE	31
LDBPK_363430	2023-01-01	c.133G>A	p.Gly45Ser	missense_variant	MODERATE	31
LDBPK_364000	2023-01-01	c.430C>G	p.Leu144Val	missense_variant	MODERATE	31
LDBPK_366560	2023-01-01	c.1351G>A	p.Ala451Thr	missense_variant	MODERATE	31
LDBPK_366560	2023-01-01	c.596G>A	p.Arg199His	missense_variant	MODERATE	31
LDBPK_366750	2023-01-01	c.1055C>T	p.Ala352Val	missense_variant	MODERATE	31

## Sheet: Supplementary table 5
sample	gene_id	gene_name	length	ncbi_protein
31	LDBPK_366750	hypothetical protein, unknown function	469	https://www.ncbi.nlm.nih.gov/protein/XP_003865786.1
31	LDBPK_366560	glucose transporter, lmgt1	653	https://www.ncbi.nlm.nih.gov/protein/XP_003865767.1
31	LDBPK_364000	aminomethyltransferase, mitochondrial precursor, putative	377	https://www.ncbi.nlm.nih.gov/protein/XP_003865514.1
31	LDBPK_363430	60S ribosomal protein L22, putative	129	https://www.ncbi.nlm.nih.gov/protein/XP_003865458.1
31	LDBPK_362510	sterol 24-c-methyltransferase, putative	353	https://www.ncbi.nlm.nih.gov/protein/XP_003865366.1
31	LDBPK_360660	ubiquitin/ribosomal protein S27a, putative	152	https://www.ncbi.nlm.nih.gov/protein/398024042
31	LDBPK_341150	amastin-like surface protein, putative	223	https://www.ncbi.nlm.nih.gov/protein/XP_003864277.1
31	LDBPK_341010	amastin-like surface protein, putative	211	https://www.ncbi.nlm.nih.gov/protein/XP_003864264.1
31	LDBPK_340710	hypothetical protein, conserved	712	https://www.ncbi.nlm.nih.gov/protein/XP_003864236.1
31	LDBPK_312060	succinyl-diaminopimelate desuccinylase-like protein	471	https://www.ncbi.nlm.nih.gov/protein/XP_003863295.1
31	LDBPK_311930	ubiquitin-fusion protein	128	https://www.ncbi.nlm.nih.gov/protein/XP_003863283.1
31	LDBPK_311920	mannosyltransferase-like protein	857	https://www.ncbi.nlm.nih.gov/protein/XP_003863282.1
31	LDBPK_311850	amino acid permease, partial	296	https://www.ncbi.nlm.nih.gov/protein/XP_003863275.1
31	LDBPK_311490	surface membrane protein gp46-like protein	302	https://www.ncbi.nlm.nih.gov/protein/XP_003863240.1
31	LDBPK_311470	hypothetical protein, unknown function	151	https://www.ncbi.nlm.nih.gov/protein/XP_003863238.1
31	LDBPK_310950	sodium stibogluconate resistance protein, putative	1553	https://www.ncbi.nlm.nih.gov/protein/XP_003863186.1
31	LDBPK_310470	pseudo		NA
31	LDBPK_310340	hypothetical protein, conserved, partial	214	https://www.ncbi.nlm.nih.gov/protein/XP_003863125.1
31	LDBPK_303560	S-adenosylmethionine synthetase	392	https://www.ncbi.nlm.nih.gov/protein/XP_003863067.1
31	LDBPK_303000	glyceraldehyde 3-phosphate dehydrogenase, glycosomal	361	https://www.ncbi.nlm.nih.gov/protein/XP_024329252.1
31	LDBPK_302480	heat shock 70-related protein 1, mitochondrial precursor, putative, partial	502	https://www.ncbi.nlm.nih.gov/protein/XP_003862960.1
31	LDBPK_272680	amino acid permease, putative	500	https://www.ncbi.nlm.nih.gov/protein/XP_003863126.1
31	LDBPK_272520	cysteine peptidase, Clan CA, family C2, putative, partial	1522	https://www.ncbi.nlm.nih.gov/protein/XP_003861909.1
31	LDBPK_270840	ATP-binding cassette protein subfamily A, member 9, putative	1879	https://www.ncbi.nlm.nih.gov/protein/XP_003861940.1
31	LDBPK_260160	60S ribosomal protein L7, putative	252	https://www.ncbi.nlm.nih.gov/protein/XP_003861605.1
31	LDBPK_251030	hypothetical protein, conserved	585	https://www.ncbi.nlm.nih.gov/protein/XP_003861433.1
31	LDBPK_240440	hypothetical predicted transmembrane protein, partial	661	https://www.ncbi.nlm.nih.gov/protein/XP_003861134.1
31	LDBPK_230580	acetyl-CoA synthetase, putative, partial	705	https://www.ncbi.nlm.nih.gov/protein/XP_003860959.1
31	LDBPK_220660	5'a2rel-related protein	1614	https://www.ncbi.nlm.nih.gov/protein/XP_003860816.1
31	LDBPK_220560	3'a2rel-related protein	615	https://www.ncbi.nlm.nih.gov/protein/XP_003860806.1
31	LDBPK_191690	hypothetical protein LDBPK_191690, partial	228	https://www.ncbi.nlm.nih.gov/protein/XP_003860342.1
31	LDBPK_191340	glycerol uptake protein, putative, partial	360	https://www.ncbi.nlm.nih.gov/protein/XP_003860308.1
31	LDBPK_190940	4-coumarate:coa ligase-like protein	612	https://www.ncbi.nlm.nih.gov/protein/XP_003860270.1
31	LDBPK_190850	ATG8/AUT7/APG8/PAZ2, putative	89	https://www.ncbi.nlm.nih.gov/protein/XP_003860262.1
31	LDBPK_190570	hypothetical protein, conserved, partial	391	https://www.ncbi.nlm.nih.gov/protein/XP_003860235.1
31	LDBPK_190140	protein kinase, putative	280	https://www.ncbi.nlm.nih.gov/protein/XP_003860193.1
31	LDBPK_181510	P-type H+-ATPase, putative	974	https://www.ncbi.nlm.nih.gov/protein/XP_003860165.1
31	LDBPK_180700	citrate synthase, putative, partial	308	https://www.ncbi.nlm.nih.gov/protein/XP_003860083.1
31	LDBPK_171590	hypothetical protein, conserved	243	https://www.ncbi.nlm.nih.gov/protein/XP_003860014.1
31	LDBPK_170170	elongation factor 1-alpha	449	https://www.ncbi.nlm.nih.gov/protein/XP_003859873.1
31	LDBPK_170140	receptor-type adenylate cyclase b, partial	685	https://www.ncbi.nlm.nih.gov/protein/XP_003859871.1
31	LDBPK_170130	receptor-type adenylate cyclase, putative, partial	953	https://www.ncbi.nlm.nih.gov/protein/XP_003859870.1
31	LDBPK_160610	histone H3, putative, partial	108	https://www.ncbi.nlm.nih.gov/protein/XP_003859748.1
31	LDBPK_160450	fucose kinase, putative	1186	https://www.ncbi.nlm.nih.gov/protein/XP_003859733.1
31	LDBPK_151540	cAMP specific phosphodiesterase, putative	940	https://www.ncbi.nlm.nih.gov/protein/XP_024329227.1
31	LDBPK_151230	nucleoside transporter 1, putative	491	https://www.ncbi.nlm.nih.gov/protein/XP_003859645.1
31	LDBPK_151140	tryparedoxin peroxidase	199	https://www.ncbi.nlm.nih.gov/protein/XP_003859636.1
31	LDBPK_140500	hypothetical protein, unknown function	275	https://www.ncbi.nlm.nih.gov/protein/XP_003859421.1
31	LDBPK_140400	hypothetical protein, conserved	310	https://www.ncbi.nlm.nih.gov/protein/XP_003859412.1
31	LDBPK_130330	alpha tubulin	451	https://www.ncbi.nlm.nih.gov/protein/XP_003859245.1
31	LDBPK_120667	unnamed protein product	195	https://www.ncbi.nlm.nih.gov/protein/XP_003859186.1
31	LDBPK_120661	unnamed protein product	439	https://www.ncbi.nlm.nih.gov/protein/XP_003859185.1
31	LDBPK_111210	ATP-binding cassette protein subfamily A, member 2, putative	1776	https://www.ncbi.nlm.nih.gov/protein/XP_003859096.1
31	LDBPK_111110	60S ribosomal protein L28, putative	147	https://www.ncbi.nlm.nih.gov/protein/XP_003859086.1
31	LDBPK_101440	phosphate-Repressible Phosphate Permease-like protein	493	https://www.ncbi.nlm.nih.gov/protein/XP_003858976.1
31	LDBPK_100521	hypothetical protein, unknown function	77	https://www.ncbi.nlm.nih.gov/protein/XP_003858889.1
31	LDBPK_081680	unnamed protein product	308	https://www.ncbi.nlm.nih.gov/protein/XP_003860142.1
31	LDBPK_081191	hypothetical protein, unknown function	432	https://www.ncbi.nlm.nih.gov/protein/XP_003858675.1
31	LDBPK_081130	hypothetical protein, conserved	506	https://www.ncbi.nlm.nih.gov/protein/XP_003858672.1
31	LDBPK_080960	cathepsin L-like protease, partial	345	https://www.ncbi.nlm.nih.gov/protein/XP_003858657.1
31	LDBPK_073400	unnamed protein product	46	https://www.ncbi.nlm.nih.gov/protein/XP_003863419.1
31	LDBPK_070950	hypothetical protein, unknown function, partial	1118	https://www.ncbi.nlm.nih.gov/protein/XP_003858531.1
31	LDBPK_070700	vacuolar-type Ca2+-ATPase, putative, partial	937	https://www.ncbi.nlm.nih.gov/protein/XP_003858509.1
31	LDBPK_061360	hypothetical protein, conserved	642	https://www.ncbi.nlm.nih.gov/protein/XP_003858442.1
31	LDBPK_060410	60S ribosomal protein L19, putative	245	https://www.ncbi.nlm.nih.gov/protein/XP_003858348.1
31	LDBPK_044340	unnamed protein product	192	https://www.ncbi.nlm.nih.gov/protein/XP_003864594.1
31	LDBPK_020700	dehydrogenase/oxidoreductase-like protein	181	https://www.ncbi.nlm.nih.gov/protein/XP_003857965.1
31	LDBPK_020680	ATP-dependent Clp protease subunit, heat shock protein 78 (HSP78), putative	817	https://www.ncbi.nlm.nih.gov/protein/XP_003857963.1
31	LDBPK_020670	hypothetical protein, conserved	937	https://www.ncbi.nlm.nih.gov/protein/XP_003857962.1
31	LDBPK_020660	hypothetical protein, conserved	454	https://www.ncbi.nlm.nih.gov/protein/XP_003857961.1
31	LDBPK_020150	phosphoglycan beta 1,3 galactosyltransferase, partial	235	https://www.ncbi.nlm.nih.gov/protein/XP_003857911.1
31	LDBPK_020010	aminopeptidase P1, putative	31	https://www.ncbi.nlm.nih.gov/protein/XP_003861585.1
30	LDBPK_341720	amastin-like surface protein, putative, partial	92	https://www.ncbi.nlm.nih.gov/protein/XP_003864332.1
30	LDBPK_310910	amino acid permease 3	480	https://www.ncbi.nlm.nih.gov/protein/XP_003863182.1
30	LDBPK_303550	hypothetical protein, conserved	592	https://www.ncbi.nlm.nih.gov/protein/XP_003863066.1
30	LDBPK_292500	kinesin, putative, partial	408	https://www.ncbi.nlm.nih.gov/protein/XP_003862668.1
30	LDBPK_220640	hypothetical protein, conserved	977	https://www.ncbi.nlm.nih.gov/protein/XP_003860814.1
30	LDBPK_191680	hypothetical protein LDBPK_191680	151	https://www.ncbi.nlm.nih.gov/protein/XP_003860901.1
30	LDBPK_141180	kinesin K39, putative, partial	178	https://www.ncbi.nlm.nih.gov/protein/XP_003859485.1
30	LDBPK_101450	pteridine transporter, putative, partial	433	https://www.ncbi.nlm.nih.gov/protein/XP_003858977.1
29	LDBPK_360210	elongation factor 2	845
29	LDBPK_211160	histone H2A	132
29	LDBPK_040770	nascent polypeptide associated complex subunit-like protein, copy 1	172
28	LDBPK_301480	ama1 protein, putative	174
28	LDBPK_240360	CMP-sialic acid transporter, putative, partial	156
27	LDBPK_342360	hypothetical protein, unknown function, partial	704
27	LDBPK_301470	ama1 protein, putative	175
27	LDBPK_271720	hypothetical protein, unknown function	2036
26	LDBPK_323350	hypothetical protein, conserved, partial	1177
26	LDBPK_210010	phosphoglycan beta 1,3 galactosyltransferase 2	79
26	LDBPK_020650	hypothetical protein, conserved	192
25	LDBPK_270510	calpain-like cysteine peptidase, putative	5550
25	LDBPK_211170	histone H2A, putative	132
24	LDBPK_341700	amastin-like surface protein, putative	272
24	LDBPK_301520	p1/s1 nuclease, partial	174
24	LDBPK_100510	GP63, leishmanolysin, partial	85
22	LDBPK_100410	folate/biopterin transporter, putative, partial	354
21	LDBPK_283000	heat-shock protein hsp70, putative	654
21	LDBPK_111230	ATP-binding cassette protein subfamily A, member 3, putative, partial	1222
21	LDBPK_081290	beta tubulin, partial	147
20	LDBPK_363930	60S ribosomal protein L34, putative	168
20	LDBPK_342650	amastin-like surface protein, putative	84
20	LDBPK_313190	iron/zinc transporter protein-like protein	432
20	LDBPK_080760	amastin-like protein, partial	244
19	LDBPK_240460	hypothetical predicted transmembrane protein, partial	229
19	LDBPK_110680	hypothetical protein, conserved in leishmania	563
18	LDBPK_340850	serine/threonine-protein phosphatase PP1, putative, partial	162
18	LDBPK_320460	40S ribosomal protein S2	264
17	LDBPK_170120	receptor-type adenylate cyclase a, partial	1010
17	LDBPK_161070	hypothetical protein, unknown function, partial	160
16	LDBPK_080720	amastin-like protein	202
15	LDBPK_291610	hypothetical protein, conserved	621
15	LDBPK_221010	hypothetical protein, conserved	280
15	LDBPK_080780	amastin-like protein	193
13	LDBPK_362130	chaperonin HSP60, mitochondrial precursor	566
13	LDBPK_360290	hypothetical protein, conserved	816
13	LDBPK_343760	hypothetical protein, conserved	270
13	LDBPK_343590	hypothetical protein, conserved	1304
13	LDBPK_343350	hypothetical protein, conserved	940
13	LDBPK_341730	amastin-like surface protein, putative, partial	187
13	LDBPK_312290	hypothetical protein, unknown function	1999
13	LDBPK_271950	branched-chain amino acid aminotransferase, putative, partial	401
13	LDBPK_020310	hypothetical protein, conserved	975
12	LDBPK_333380	60S ribosomal protein L44, putative	106
12	LDBPK_302230	hypothetical protein, conserved	538
12	LDBPK_020170	phosphoglycan beta 1,3 galactosyltransferase	361
11	LDBPK_161760	hypothetical protein, conserved	2490
10	LDBPK_354900	hypothetical protein, conserved	256
10	LDBPK_300710	40S ribosomal protein S30, putative	66
10	LDBPK_271460	diacylglycerol acyltransferase, putative	1557
9	LDBPK_361210	endonuclease/exonuclease/phosphatase, putative, partial	173
9	LDBPK_353030	chaperone protein DNAj, putative	478
9	LDBPK_342390	hypothetical protein, conserved	762
9	LDBPK_291720	hypothetical protein, unknown function	1012
9	LDBPK_05snoRNA1
9	LDBPK_030260	hypothetical protein LDBPK_030260, partial	230
8	LDBPK_330960	40S ribosomal protein S3, putative	342
8	LDBPK_140710	fatty acid elongase, putative	268
8	LDBPK_030730	hypothetical protein, conserved	716
7	LDBPK_362140	chaperonin HSP60, mitochondrial precursor	562
7	LDBPK_331920	hypothetical protein, conserved	430
7	LDBPK_323330	ribosomal protein L3, putative, partial	100
7	LDBPK_311290	p-glycoprotein e, partial	1525
7	LDBPK_301670	hypothetical protein, conserved	457
7	LDBPK_261000	dynein heavy chain, putative	4043
7	LDBPK_260590	10 kDa heat shock protein, putative, partial	103
7	LDBPK_240040	60S ribosomal protein L17, putative	166
7	LDBPK_071280
6	LDBPK_365700	hypothetical protein, conserved	522
6	LDBPK_363720	hypothetical protein, conserved	392
6	LDBPK_363100	succinyl-CoA ligase [GDP-forming] beta-chain, putative	413
6	LDBPK_361560	hypothetical protein, conserved	948
6	LDBPK_351150	oligosaccharyl transferase-like protein, partial	254
6	LDBPK_350660	hypothetical protein, unknown function	123
6	LDBPK_311320	hypothetical protein, conserved	1027
6	LDBPK_281920	hypothetical protein, conserved	2567
6	LDBPK_211510	hypothetical protein, conserved	835
6	LDBPK_200750	hypothetical protein, conserved	1339
6	LDBPK_170570	hypothetical protein, unknown function	1030
6	LDBPK_131370	mitochondrial DNA polymerase I protein D, putative	1579
6	LDBPK_090180	ATG8/AUT7/APG8/PAZ2, putative	134
6	LDBPK_080260	hypothetical protein, conserved	38
6	LDBPK_010740	hypothetical protein, conserved	1303
5	LDBPK_360910	hypothetical protein, conserved	888
5	LDBPK_360270	EIF3-interacting protein-like protein	544
5	LDBPK_354330	hypothetical protein, conserved	377
5	LDBPK_353430	hypothetical protein, conserved	547
5	LDBPK_352420	hypothetical protein, conserved	825
5	LDBPK_351980	hypothetical protein, conserved	1061
5	LDBPK_343640	hypothetical protein, conserved	233
5	LDBPK_332760	hypothetical protein, conserved	492
5	LDBPK_332210	copper-transporting ATPase-like protein, putative	1163
5	LDBPK_323190	hypothetical protein, conserved	403
5	LDBPK_312770	hypothetical protein, conserved	1316
5	LDBPK_301250	hypothetical protein, unknown function	618
5	LDBPK_291760	hypothetical protein, conserved	2387
5	LDBPK_290380	protein kinase-like protein	1550
5	LDBPK_281620	hypothetical protein, conserved	132
5	LDBPK_281540	DNA polymerase kappa, putative	598
5	LDBPK_281360	hypothetical protein, conserved	438
5	LDBPK_261410	hypothetical protein, conserved	1148
5	LDBPK_260910	hypothetical protein, conserved	843
5	LDBPK_241200	hypothetical protein, conserved	1279
5	LDBPK_221170	hypothetical protein, conserved	729
5	LDBPK_220400	hypothetical protein, conserved	1134
5	LDBPK_211020	hypothetical protein LDBPK_211020	2660
5	LDBPK_210300	hexokinase, putative	471
5	LDBPK_170750	hypothetical protein, conserved, partial	430
5	LDBPK_170520	hypothetical protein, conserved	3700
5	LDBPK_161270	hypothetical protein, conserved	2201
5	LDBPK_150400	hypothetical protein, conserved	654
5	LDBPK_141470	hypothetical protein, unknown function	317
5	LDBPK_130860	hypothetical protein, conserved	643
5	LDBPK_120610	serine/threonine protein phosphatase-like protein	961
5	LDBPK_120500	hypothetical protein, conserved	167
5	LDBPK_120145	unnamed protein product	816
5	LDBPK_080790	amastin-like protein	94
5	LDBPK_080350	hypothetical protein, conserved	4776
5	LDBPK_080220	hypothetical protein, unknown function	501
5	LDBPK_060920	hypothetical protein, conserved	778
5	LDBPK_060560	hypothetical protein, conserved	131
5	LDBPK_030790	6-phosphofructo-2-kinase/fructose-2,6-biphospha ta se,putative	2393
4	LDBPK_365120	exosome-associated protein 4, putative	221
4	LDBPK_353150	ATP-dependent RNA helicase, putative	917
4	LDBPK_350070	prohibitin, putative	292
4	LDBPK_332350	hypothetical protein, conserved	755
4	LDBPK_321310	ubiquitin hydrolase, putative	538
4	LDBPK_310100	hypothetical protein, conserved	492
4	LDBPK_300740	CDC16, putative	546
4	LDBPK_292710	poly(A) polymerase, putative	302
4	LDBPK_230230	ATP-binding cassette protein subfamily C, member 1, putative, partial	1332
4	LDBPK_201090	hypothetical protein, unknown function	275
4	LDBPK_150390	hypothetical protein, conserved	494
4	LDBPK_131620	ras-like small GTPases, putative	365
4	LDBPK_040760	nascent polypeptide associated complex subunit-like protein, copy 2, partial	184
3	LDBPK_361500	hypothetical protein, conserved	5603
3	LDBPK_360050	PUF1, putative	553
3	LDBPK_343800	adaptor gamma-1 chain, putative	831
3	LDBPK_331330	hypothetical protein, conserved	976
3	LDBPK_323960	hypothetical protein, conserved	577
3	LDBPK_320410	ATP-dependent RNA helicase, putative	614
3	LDBPK_312990	hypothetical protein, conserved	1240
3	LDBPK_291430	hypothetical protein LDBPK_291430	302
3	LDBPK_271870	hypothetical protein, conserved	1656
3	LDBPK_271220	hypothetical protein, conserved, partial	90
3	LDBPK_262390	hypothetical protein, conserved	3983
3	LDBPK_261680	fatty acid desaturase, putative, partial	359
3	LDBPK_251150	hypothetical protein, conserved	6525
3	LDBPK_242370	TFIIH basal transcription factor complex helicase subunit, putative	813
3	LDBPK_240670	hypothetical protein, conserved	762
3	LDBPK_221250	hypothetical protein, conserved	526
3	LDBPK_220470	hypothetical protein, conserved	493
3	LDBPK_210190	protein kinase, putative	1711
3	LDBPK_201730	aminoacylase, putative	55
3	LDBPK_200800	tubulin-tyrosine ligase, putative	725
3	LDBPK_190580	hypothetical protein, conserved	3088
3	LDBPK_181060	hypothetical protein, conserved	1454
3	LDBPK_180970	hypothetical protein, conserved	1997
3	LDBPK_170540	hypothetical protein, unknown function	533
3	LDBPK_141250	ras-like small GTPases, putative	402
3	LDBPK_140730	fatty acid elongase, putative, partial	146
3	LDBPK_100390	folate/biopterin transporter, putative, partial	305
3	LDBPK_091050	hypothetical protein, conserved	5361
3	LDBPK_090170	microtubule associated protein-like protein	124
3	LDBPK_081330	unnamed protein product	203
3	LDBPK_040740	hypothetical protein, conserved, partial	644
3	LDBPK_030760	serine/threonine-protein kinase, putative, partial	3160
2	LDBPK_367040	hypothetical protein, conserved	1361
2	LDBPK_365020	hypothetical protein, conserved	926
2	LDBPK_362740	folylpolyglutamate synthetase	540
2	LDBPK_362540	hypothetical protein, conserved	1923
2	LDBPK_362370	hypothetical protein, conserved	2603
2	LDBPK_360630	hypothetical protein, unknown function	492
2	LDBPK_360100	hypothetical protein, conserved	1056
2	LDBPK_360020	histone H4	100
2	LDBPK_354560	hypothetical protein, conserved	1483
2	LDBPK_353960	hypothetical protein, conserved	804
2	LDBPK_353820	hypothetical protein, conserved	651
2	LDBPK_352790	galactokinase-like protein	476
2	LDBPK_351520	hypothetical protein, conserved	619
2	LDBPK_351510	hypothetical protein, conserved	584
2	LDBPK_344210	hypothetical protein, conserved	325
2	LDBPK_343940	hypothetical protein, conserved	2599
2	LDBPK_343690	dynein heavy chain, putative	4645
2	LDBPK_343230	hypothetical protein, conserved	1209
2	LDBPK_342640	tuzin, putative	559
2	LDBPK_341970	hypothetical protein, unknown function	954
2	LDBPK_341600	hypothetical protein, conserved	803
2	LDBPK_340830	serine/threonine-protein phosphatase PP1, putative	244
2	LDBPK_340550	hypothetical protein, unknown function	491
2	LDBPK_340060	hypothetical protein, conserved	1066
2	LDBPK_332400	hypothetical protein, conserved	306
2	LDBPK_330280	RNA binding protein rggm, putative	279
2	LDBPK_323030	hypothetical protein, conserved	444
2	LDBPK_322790	hypothetical protein, conserved	2045
2	LDBPK_321950	hypothetical protein, conserved	414
2	LDBPK_320280	hypothetical protein, conserved	1302
2	LDBPK_311480	hypothetical protein, unknown function	412
2	LDBPK_310270	hypothetical protein, conserved	163
2	LDBPK_303760	hypothetical protein, conserved	857
2	LDBPK_303090	protein kinase-like protein	1900
2	LDBPK_301350	vacuolar assembly protein vps41, putative	1446
2	LDBPK_300920	surface protein amastin, putative	198
2	LDBPK_300030	hypothetical protein, conserved	238
2	LDBPK_300010	hypothetical protein, conserved	425
2	LDBPK_292380	hypothetical protein, unknown function	324
2	LDBPK_291270	hypothetical protein, conserved	2458
2	LDBPK_290540	hypothetical protein, conserved	3009
2	LDBPK_271010	intraflagellar transport protein IFT88, putative	811
2	LDBPK_270690	hypothetical protein, conserved	1035
2	LDBPK_270050	DEAD-box helicase-like protein	787
2	LDBPK_261790	hypothetical protein, conserved	2772
2	LDBPK_250200	hypothetical protein, conserved	1376
2	LDBPK_250040	hypothetical protein, conserved	1267
2	LDBPK_240430	hypothetical protein, unknown function	89
2	LDBPK_210390	hypothetical protein, conserved	1067
2	LDBPK_200930	hypothetical protein, conserved	81
2	LDBPK_191020	hypothetical protein, unknown function	1367
2	LDBPK_190360	protein kinase, putative	1858
2	LDBPK_190210	polyprenyl synthase, putative	742
2	LDBPK_190130	protein kinase, putative	631
2	LDBPK_180070	hypothetical protein, conserved	724
2	LDBPK_160180	hypothetical protein, conserved	4440
2	LDBPK_151650	hypothetical protein, conserved	543
2	LDBPK_150130	ATP-dependent RNA helicase, putative	650
2	LDBPK_150020	hypothetical protein, conserved	620
2	LDBPK_140370	hypothetical protein, conserved, partial	497
2	LDBPK_131350	MCAK-like kinesin, putative	728
2	LDBPK_130800	hypothetical protein, conserved	821
2	LDBPK_111040	hypothetical protein, conserved	814
2	LDBPK_111020	hypothetical protein, conserved	1855
2	LDBPK_100400	folate/biopterin transporter, putative, partial	397
2	LDBPK_091480	hypothetical protein, conserved	573
2	LDBPK_091350	hypothetical protein, conserved	577
2	LDBPK_091300	hypothetical protein, conserved, partial	2047
2
2	LDBPK_080010	adaptor complex protein (AP) 3 delta subunit 1, putative	1198
2	LDBPK_071330	hypothetical protein, conserved	2542
2	LDBPK_070690	hypothetical protein, conserved	557
2	LDBPK_070010	ubiquitin activating E1 enzyme, putative	725
2	LDBPK_060840	hypothetical protein, unknown function	3592
2	LDBPK_040490	hypothetical protein, conserved	3006
2	LDBPK_030960	elongation initiation factor 2 alpha subunit, putative	413
2	LDBPK_030530	hypothetical protein, conserved	1444
2	LDBPK_030010	hypothetical protein LDBPK_030010	1009
2	LDBPK_010640	hypothetical protein, conserved	595
1	LDBPK_367260	RNA editing comple protein MP63	626
1	LDBPK_367180	hypothetical protein, conserved	905
1	LDBPK_366920	hypothetical protein, conserved	369
1	LDBPK_366880	hypothetical protein, conserved	362
1	LDBPK_366830	hypothetical protein, conserved	681
1	LDBPK_366670	methylenetetrahydrofolate reductase, putative	309
1	LDBPK_366610	hypothetical protein, conserved	194
1	LDBPK_366580	phosphatidylinositol 3 kinase, putative	2613
1	LDBPK_366490	ADP ribosylation factor 3, putative	178
1	LDBPK_366390	hypothetical protein, conserved	323
1	LDBPK_366210	hypothetical protein, conserved	389
1	LDBPK_366140	ras-like small GTPases, putative	364
1	LDBPK_366000	hypothetical protein, conserved	680
1	LDBPK_365750	hypothetical protein, conserved	508
1	LDBPK_365720	hypothetical protein, conserved	668
1	LDBPK_365590	ubiquinone biosynthesis methyltransferase, putative	288
1	LDBPK_365480	hypothetical protein, conserved	3020
1	LDBPK_365470	glycosyl hydrolase, putative	1154
1	LDBPK_365130	hypothetical protein, conserved	2045
1	LDBPK_365070	hypothetical protein, conserved	1208
1	LDBPK_364580	hypothetical protein, conserved	2572
1	LDBPK_364560	hypothetical protein, conserved	889
1	LDBPK_364540	hypothetical protein, conserved	1625
1	LDBPK_364230	zinc carboxypeptidase, putative	1555
1	LDBPK_364070	eukaryotic translation initiation factor 3 subunit, putative	356
1	LDBPK_364050	similar to leishmania major. l411.4-like protein	577
1	LDBPK_364040	hypothetical protein, conserved	225
1	LDBPK_363950	60S ribosomal protein L10a, putative, partial	78
1	LDBPK_363860	calmodulin, putative	155
1	LDBPK_363850	hypothetical protein, conserved	340
1	LDBPK_363830	hypothetical protein, conserved	585
1	LDBPK_363790	hypothetical protein, unknown function	296
1	LDBPK_363650	hypothetical protein, conserved	339
1	LDBPK_363630	2-oxoglutarate dehydrogenase E1 component, putative	1012
1	LDBPK_363590	hypothetical protein, conserved	792
1	LDBPK_363550	ribosomal protein L29, putative	70
1	LDBPK_363500	hypothetical transmembrane protein	2533
1	LDBPK_363400	hypothetical protein, unknown function	853
1	LDBPK_363180	clathrin coat assembly protein-like protein	438
1	LDBPK_362840	hypothetical protein, conserved	1437
1	LDBPK_362830	hypothetical protein, conserved	339
1	LDBPK_362590	hypothetical protein, conserved	706
1	LDBPK_362400	hypothetical protein, unknown function	461
1	LDBPK_362280	COP-coated vesicle membrane protein erv25 precursor, putative	268
1	LDBPK_362200	streptococcal hemagglutinin-like protein	1289
1	LDBPK_362050	mismatch repair protein MSH8, putative	1014
1	LDBPK_361820	hypothetical protein, conserved	1834
1	LDBPK_361800	hypothetical protein, conserved	4367
1	LDBPK_361440	hypothetical protein, conserved	1110
1	LDBPK_361370	hypothetical protein, conserved	422
1	LDBPK_361360	hypothetical protein, conserved	257
1	LDBPK_361120	hypothetical protein, conserved	1007
1	LDBPK_361010	dynein heavy chain, putative	4172
1	LDBPK_360930	DEAH-box RNA helicase, putative	944
1	LDBPK_360860	hypothetical protein, conserved	557
1	LDBPK_360830	hypothetical protein, conserved	438
1	LDBPK_360820	hypothetical protein, conserved	850
1	LDBPK_360810	hypothetical protein, conserved	1290
1	LDBPK_360600	cell division related protein kinase 2	311
1	LDBPK_360560	protein phosphatase 2C-like protein	298
1	LDBPK_360450	amino acid permease-like protein	494
1	LDBPK_360370	nuclear protein family a (nop10p), putative	63
1	LDBPK_360160	fructose-6-phosphate2-kinase/fructose-2,6-bisph os phatase-likeprotein	485
1	LDBPK_360070	hypothetical protein, conserved	322
1	LDBPK_360010	phosphoglycan beta 1,3 galactosyltransferase 4, partial	48
1	LDBPK_355240	hypothetical protein, conserved	356
1	LDBPK_355180	hypothetical protein, conserved	464
1	LDBPK_355130	hypothetical protein, conserved	306
1	LDBPK_355080	hypothetical protein, conserved	6625
1	LDBPK_355030	inositol phosphorylceramide synthase	385
1	LDBPK_354850	hypothetical protein, conserved	220
1	LDBPK_354790	glycine cleavage system H protein, putative	107
1	LDBPK_354530	sm-f snRNP core complex protein, putative	76
1	LDBPK_354520	hypothetical protein, conserved	91
1	LDBPK_354160	hypothetical protein, conserved	422
1	LDBPK_354000	PRP8 protein homologue, putative	2427
1	LDBPK_353990	hypothetical protein, conserved	604
1	LDBPK_353680	hypothetical protein, conserved	620
1	LDBPK_353590	hypothetical protein, conserved	221
1	LDBPK_353510	hypothetical protein, conserved	369
1	LDBPK_353170	hypothetical protein, conserved	1627
1	LDBPK_353120	hypothetical protein, conserved	822
1	LDBPK_353070	phospholipase A2-like protein, putative	453
1	LDBPK_352870	hypothetical protein, conserved	647
1	LDBPK_352820	hypothetical protein, conserved	1315
1	LDBPK_352750	hypothetical protein, conserved	512
1	LDBPK_352730	hypothetical protein, conserved	414
1	LDBPK_352600	cytochrome P450 reductase, putative	832
1	LDBPK_352500	hypothetical protein, conserved	2310
1	LDBPK_352460	ubiquitin hydrolase, putative	545
1	LDBPK_352380	hypothetical protein, conserved	919
1	LDBPK_352320	ATP-dependent RNA helicase-like protein	1513
1	LDBPK_352290	hypothetical protein, conserved	534
1	LDBPK_352210	hypothetical protein, conserved	484
1	LDBPK_352180	hypothetical protein, conserved	545
1	LDBPK_351750	hypothetical protein, conserved	140
1	LDBPK_351700	RNA 3'-terminal phosphate cyclase, putative	362
1	LDBPK_351650	hypothetical protein, conserved	639
1	LDBPK_351500	hypothetical protein, conserved	384
1	LDBPK_351280	hypothetical protein, conserved	358
1	LDBPK_351230	short chain dehydrogenase, putative	233
1	LDBPK_351190	NADH-dependent fumarate reductase, putative	1147
1	LDBPK_351160	oligosaccharyl transferase-like protein	794
1	LDBPK_351040	hypothetical protein, unknown function	432
1	LDBPK_350450	hypothetical protein, conserved	917
1	LDBPK_350090	hypothetical protein, conserved	282
1	LDBPK_344250	hypothetical protein, conserved	801
1	LDBPK_344160	phosphatidylinositol 3-kinase (tor2)-like protein	2437
1	LDBPK_344010	hypothetical protein, conserved	580
1	LDBPK_343990	dynein heavy chain, putative	4241
1	LDBPK_343920	hypothetical protein, conserved	489
1	LDBPK_343560	actin-like protein, putative	267
1	LDBPK_343480	hypothetical protein, conserved	1374
1	LDBPK_343460	vacuolar ATP synthase catalytic subunit A, putative	610
1	LDBPK_343370	phosphatidylinositol 4-kinase, putative	611
1	LDBPK_343030	putative pyruvate/indole-pyruvate carboxylase, putative	583
1	LDBPK_342980	hypothetical protein, conserved	1067
1	LDBPK_342890	mitochondrial carrier protein-like protein	358
1	LDBPK_342830	hypothetical protein, conserved	628
1	LDBPK_342550	hypothetical protein, conserved	673
1	LDBPK_342490	hypothetical protein, conserved	906
1	LDBPK_342340	hypothetical protein, conserved	2428
1	LDBPK_342290	hypothetical protein, conserved	359
1	LDBPK_342200	DNAj-like protein	808
1	LDBPK_342110	asparaginyl-tRNA synthetase, putative	890
1	LDBPK_341910	protein kinase, putative	1467
1	LDBPK_341770	hypothetical protein, conserved	629
1	LDBPK_341740	hypothetical protein, conserved	1014
1	LDBPK_341690	amastin-like surface protein, putative	210
1	LDBPK_341610	hypothetical protein, conserved	509
1	LDBPK_341380	hypothetical protein, conserved	1864
1	LDBPK_341360	NLI-interacting factor, putative	358
1	LDBPK_341260	hypothetical protein, conserved	665
1	LDBPK_341170	dihydroxyacetonephosphate acyltransferase	1431
1	LDBPK_341020	amastin-like surface protein, putative	170
1	LDBPK_340870	elongation factor 1-beta	239
1	LDBPK_340540	hypothetical protein, unknown function	1442
1	LDBPK_340390	hypothetical protein, conserved	1139
1	LDBPK_340360	hypothetical protein, conserved	803
1	LDBPK_340300	calpain-like cysteine peptidase, putative	1552
1	LDBPK_340240	hypothetical protein, unknown function	335
1	LDBPK_340150	malate dehydrogenase	317
1	LDBPK_340080	glucose-6-phosphate 1-dehydrogenase, putative	562
1	LDBPK_340010	hypothetical protein, conserved	306
1	LDBPK_333210	tyrosyl-DNA phosphodiesterase-like protein	682
1	LDBPK_333180	hypothetical protein, unknown function	968
1	LDBPK_332890	hypothetical protein, conserved	1089
1	LDBPK_332800	hypothetical protein, conserved	914
1	LDBPK_332560	hypothetical protein, conserved	650
1	LDBPK_332500	hypothetical protein, conserved	563
1	LDBPK_331880	hypothetical protein, conserved	1631
1	LDBPK_331830	hypothetical protein, conserved	893
1	LDBPK_331780	thiamine biosynthesis-like protein	795
1	LDBPK_331290	hypothetical protein, conserved	621
1	LDBPK_331210	pumilio protein, putative	837
1	LDBPK_331100	hypothetical protein, conserved	450
1	LDBPK_330890	hypothetical protein, unknown function	916
1	LDBPK_330870	2,4-dienoyl-coa reductase fadh1, putative	730
1	LDBPK_330600	hypothetical protein, conserved	579
1	LDBPK_330080	hypothetical protein, conserved	175
1	LDBPK_324140	GIPL galf transferase, putative	596
1	LDBPK_324120	cyclic nucleotide-binding protein-like protein	699
1	LDBPK_324090	hypothetical protein, conserved	556
1	LDBPK_324080	hypothetical protein, conserved	4087
1	LDBPK_324020	myosin XXI	1050
1	LDBPK_323950	hypothetical protein, conserved	224
1	LDBPK_323920	kinetoplast-associated protein p18-2, putative	132
1	LDBPK_323870	hypothetical protein, unknown function	475
1	LDBPK_323850	hypothetical protein, conserved	727
1	LDBPK_323840	hypothetical protein, conserved	971
1	LDBPK_323820	3-hydroxyisobutyryl-coenzyme a hydrolase-like protein	349
1	LDBPK_323800	hypothetical protein, conserved	423
1	LDBPK_323770	hypothetical protein, conserved	147
1	LDBPK_323700	hypothetical protein, conserved	300
1	LDBPK_323240	hypothetical protein, conserved	825
1	LDBPK_323230	protein phosphatase 2A catalytic subunit, putative	308
1	LDBPK_323120	minichromosome maintenance (MCM) complex subunit, putative	725
1	LDBPK_323070	hypothetical protein, conserved	727
1	LDBPK_323060	ubiquitin hydrolase, putative	1341
1	LDBPK_322990	hypothetical protein, conserved	639
1	LDBPK_322940	hypothetical protein, conserved	1361
1	LDBPK_322910	hypothetical protein, conserved	956
1	LDBPK_322900	hypothetical protein, conserved	881
1	LDBPK_322840	hypothetical protein, conserved	1128
1	LDBPK_322810	hypothetical protein, conserved	790
1	LDBPK_322670	hypothetical protein, conserved	958
1	LDBPK_322560	hypothetical protein, conserved	2563
1	LDBPK_322390	methionyl-tRNA formyltransferase, putative	986
1	LDBPK_322340	hypothetical protein, unknown function	639
1	LDBPK_322000	hypothetical protein, conserved	1223
1	LDBPK_321830	hypothetical protein, conserved	778
1	LDBPK_321530	hypothetical protein, conserved	279
1	LDBPK_321520	phosphatidylinositol 3-related kinase, putative	3211
1	LDBPK_321330	hypothetical protein, conserved	766
1	LDBPK_321190	hypothetical protein, conserved	1607
1	LDBPK_321150	hypothetical protein, conserved	1629
1	LDBPK_321120	dynein, putative	601
1	LDBPK_321100	hypothetical protein, conserved	669
1	LDBPK_320960	hypothetical protein, conserved	280
1	LDBPK_320870	CYC2-like cyclin, putative	164
1	LDBPK_320700	hypothetical protein, conserved	302
1	LDBPK_320660	hypothetical protein, conserved	186
1	LDBPK_320570	hypothetical protein, conserved	511
1	LDBPK_320540	hypothetical protein, conserved	363
1	LDBPK_320400	proteasome regulatory non-ATP-ase subunit 8, putative	359
1	LDBPK_320310	hypothetical protein, conserved	762
1	LDBPK_320170	hypothetical protein, conserved	91
1	LDBPK_320110	mitochondrial carrier protein, putative	312
1	LDBPK_313260	methylcrotonoyl-coa carboxylase biotinylated subunitprotein-like protein	687
1	LDBPK_312660	hypothetical protein, conserved	924
1	LDBPK_312400	3,2-trans-enoyl-CoA isomerase, mitochondrial precursor, putative	349
1	LDBPK_312330	aminopeptidase, putative	621
1	LDBPK_311980	transcription like protein nupm1, putative	478
1	LDBPK_311900	hypothetical protein LDBPK_311900	152
1	LDBPK_311670	hypothetical protein, conserved	478
1	LDBPK_311560	protein kinase, putative	2283
1	LDBPK_311440	hypothetical protein, conserved	2394
1	LDBPK_311280	hypothetical protein, conserved	627
1	LDBPK_311020	hypothetical protein, conserved	951
1	LDBPK_311000	hypothetical protein, conserved	1121
1	LDBPK_310880	hypothetical protein LDBPK_310880, partial	332
1	LDBPK_310840	hypothetical protein, conserved	629
1	LDBPK_310820	c2 domain protein, putative	288
1	LDBPK_310810	c2 domain protein, putative	245
1	LDBPK_310540	hypothetical protein, conserved	626
1	LDBPK_310510	hypothetical protein, unknown function	822
1	LDBPK_310490	hypothetical protein, conserved	242
1	LDBPK_310480	calpain-like cysteine peptidase, putative	777
1	LDBPK_310150	ubiquitin hydrolase, putative	458
1	LDBPK_310040	hypothetical protein, conserved	1052
1	LDBPK_303620	mago nashi-like protein,putative	162
1	LDBPK_303570	hypothetical protein, conserved	247
1	LDBPK_303380	hypothetical protein, conserved	390
1	LDBPK_303300	ATP-dependent RNA helicase, putative	1029
1	LDBPK_303230	3-hydroxy-3-methylglutaryl-CoA reductase, putative	434
1	LDBPK_303140	hypothetical protein, conserved	639
1	LDBPK_302940	hypothetical protein, conserved	454
1	LDBPK_302930	mitogen-activated protein kinase 5, putative	386
1	LDBPK_302910	hypothetical protein, conserved	457
1	LDBPK_302890	hypothetical protein, conserved	470
1	LDBPK_302790	hypothetical protein, unknown function	338
1	LDBPK_302730	hypothetical protein, conserved	943
1	LDBPK_302630	hypothetical protein, conserved	831
1	LDBPK_302620	replication factor C, subunit 2, putative	354
1	LDBPK_302580	hypothetical protein, conserved	493
1	LDBPK_302400	hypothetical protein, conserved	3790
1	LDBPK_302340	hypothetical protein, unknown function	349
1	LDBPK_302260	zinc-finger protein, conserved	371
1	LDBPK_302160	hypothetical protein, conserved	851
1	LDBPK_302050	ferric reductase transmembrane protein-like protein	27
1	LDBPK_301940	RNA pseudouridylate synthase-like protein	533
1	LDBPK_301810	hypothetical protein, conserved	5559
1	LDBPK_301780	protein kinase, putative	626
1	LDBPK_301760	hypothetical protein, conserved	1951
1	LDBPK_301500	hypothetical protein, conserved	1467
1	LDBPK_301390	ATP-binding cassette protein subfamily H, member 3, putative	441
1	LDBPK_301220	hypothetical protein, conserved	1786
1	LDBPK_301200	hypothetical protein, conserved	183
1	LDBPK_300890	hypothetical protein, conserved	771
1	LDBPK_300850	rac serine-threonine kinase, putative	510
1	LDBPK_300840	hypothetical protein, conserved	425
1	LDBPK_300830	mitochondrial oligo_U binding protein TBRGG1, putative	677
1	LDBPK_300750	hypothetical protein, conserved	277
1	LDBPK_300310	hypothetical protein, conserved	1395
1	LDBPK_300250	ubiquitin hydrolase, putative	1132
1	LDBPK_300240	hypothetical protein, conserved	596
1	LDBPK_300130	lysyl-tRNA synthetase, putative	536
1	LDBPK_300060	hypothetical protein, conserved	240
1	LDBPK_300050	hypothetical protein, conserved	762
1	LDBPK_292690	hypothetical protein, conserved, partial	445
1	LDBPK_292630	hypothetical protein, conserved	402
1	LDBPK_292510	hypothetical protein, conserved	399
1	LDBPK_292340	hypothetical protein, conserved	47
1	LDBPK_292320	hypothetical protein, conserved	447
1	LDBPK_292160	hypothetical protein, conserved	1287
1	LDBPK_292110	hypothetical protein, conserved	536
1	LDBPK_291850	histone H2A, putative	240
1	LDBPK_291520	hypothetical protein, unknown function	1261
1	LDBPK_291470	RNA binding protein, putative	663
1	LDBPK_291200	hypothetical protein, conserved	625
1	LDBPK_291090	hypothetical protein, conserved	628
1	LDBPK_291050	hypothetical protein, unknown function	432
1	LDBPK_290970	hypothetical protein, conserved	452
1	LDBPK_290740	hypothetical protein, conserved	855
1	LDBPK_290640	ATP-binding cassette protein subfamily A, member 10, putative	1866
1	LDBPK_290570	hypothetical protein LDBPK_290570	229
1	LDBPK_290400	RNA binding protein, putative	260
1	LDBPK_290270	hypothetical protein, conserved	617
1	LDBPK_290050	hypothetical protein, conserved	672
1	LDBPK_283240	protein kinase, putative	386
1	LDBPK_283110	dynein heavy chain, putative	4227
1	LDBPK_282810	hypothetical protein, conserved	1754
1	LDBPK_282730	hypothetical protein, conserved	1556
1	LDBPK_282560	hypothetical protein, conserved	1357
1	LDBPK_282550	DNA replication licensing factor, putative	880
1	LDBPK_282370	glycoprotein 96-92, putative	401
1	LDBPK_282310	hypothetical protein, conserved	243
1	LDBPK_282230	hypothetical protein, conserved	627
1	LDBPK_282160	hypothetical protein, conserved	578
1	LDBPK_281990	hypothetical protein, conserved	671
1	LDBPK_281870	hypothetical protein, conserved	892
1	LDBPK_281840	hypothetical protein, conserved	619
1	LDBPK_281730	helicase-like protein	1279
1	LDBPK_281710	phosphonopyruvate decarboxylase-like protein	415
1	LDBPK_281430	prenyltransferase, putative	489
1	LDBPK_281250	long-chain-fatty-acid-coA ligase protein,putative	741
1	LDBPK_281200	hypothetical protein, conserved	851
1	LDBPK_281090	hypothetical protein, conserved	939
1	LDBPK_280910	hypothetical protein, conserved	532
1	LDBPK_280850	putative dual-specificity protein phosphatase, putative	629
1	LDBPK_280840	hypothetical protein, conserved	455
1	LDBPK_280810	DNA repair protein, putative	736
1	LDBPK_280760	hypothetical protein, conserved	585
1	LDBPK_280560	RAD50 DNA repair-like protein	1360
1	LDBPK_280290	hypothetical protein, conserved	796
1	LDBPK_280280	carbonic anhydrase-like protein	628
1	LDBPK_280090	adenylate cyclase-like protein	616
1	LDBPK_280060	hypothetical protein, conserved	485
1	LDBPK_280030	origin recognition complex subunit 1 (ORC1), putative	431
1	LDBPK_272340	TPR-repeat protein, putative	489
1	LDBPK_272260	GTP binding protein, putative	392
1	LDBPK_272050	hypothetical protein, conserved	1853
1	LDBPK_271670	hypothetical protein, conserved	1390
1	LDBPK_271540	hypothetical protein, conserved	915
1	LDBPK_271520	eukaryotic translation initiation factor eIF-4E, putative	213
1	LDBPK_271280	hypothetical protein, conserved	686
1	LDBPK_271170	ubiquitin hydrolase, putative	575
1	LDBPK_271140	hypothetical protein, conserved	321
1	LDBPK_271020	hypothetical protein, conserved	583
1	LDBPK_270990	hypothetical protein, conserved	221
1	LDBPK_270950	hypothetical protein, conserved	1569
1	LDBPK_270820	hypothetical protein, conserved	1433
1	LDBPK_270660	hypothetical protein, conserved	438
1	LDBPK_270650	hypothetical protein, conserved	884
1	LDBPK_270630	hypothetical protein, conserved	1333
1	LDBPK_270590	NADH-ubiquinone oxidoreductase 20 kDa subunit, mitochondrial precursor	201
1	LDBPK_270580	reductase, putative	329
1	LDBPK_270570	hypothetical protein, conserved	411
1	LDBPK_270560	hypothetical protein, conserved	494
1	LDBPK_270440	hypothetical protein, conserved	610
1	LDBPK_270020	hypothetical protein, conserved	1029
1	LDBPK_262690	hypothetical protein, conserved	827
1	LDBPK_262370	hypothetical protein, conserved	861
1	LDBPK_261580	hypothetical protein, unknown function	668
1	LDBPK_261400	hypothetical protein, conserved	2421
1	LDBPK_261180	hypothetical protein, conserved	652
1	LDBPK_261170	hypothetical protein, conserved	1760
1	LDBPK_261090	hypothetical protein, conserved	4122
1	LDBPK_261060	hypothetical protein, conserved	1925
1	LDBPK_260880	hypothetical protein, conserved	401
1	LDBPK_260630	protein disulfide isomerase, putative	377
1	LDBPK_260380	RNA editing 3' terminal uridylyl transferase 2	510
1	LDBPK_260360	hypothetical protein, conserved	853
1	LDBPK_260220	hypothetical protein, unknown function	378
1	LDBPK_252520	hypothetical protein, conserved	961
1	LDBPK_252470	hypothetical protein, conserved	573
1	LDBPK_252060	hypothetical protein, conserved	1481
1	LDBPK_251730	hypothetical protein, conserved	960
1	LDBPK_251700	hypothetical protein, conserved	465
1	LDBPK_251520	hypothetical protein, conserved	773
1	LDBPK_251420	hypothetical protein, conserved	236
1	LDBPK_251400	hypothetical protein, conserved	966
1	LDBPK_251370	hypothetical protein, conserved	705
1	LDBPK_250910	hypothetical protein, conserved	1332
1	LDBPK_250820	hypothetical protein, unknown function	1168
1	LDBPK_250780	protein phosphatase, putative	406
1	LDBPK_250700	hypothetical protein, conserved	1058
1	LDBPK_250680	epsin, putative	552
1	LDBPK_250630	RNA polymerase I second largest subunit, putative	1616
1	LDBPK_250580	hypothetical protein, conserved	340
1	LDBPK_250490	hypothetical protein, conserved	1506
1	LDBPK_250300	hypothetical protein, conserved	615
1	LDBPK_250290	hypothetical protein, conserved	584
1	LDBPK_250280	hypothetical protein, conserved	691
1	LDBPK_250180	hypothetical protein, conserved	1049
1	LDBPK_250170	cleavage and polyadenylation specificity factor, putative	818
1	LDBPK_250010	beta galactofuranosyl transferase	434
1	LDBPK_242430	hypothetical protein, conserved	468
1	LDBPK_242420	hypothetical protein, conserved	258
1	LDBPK_242410	mitogen-activated protein kinase	350
1	LDBPK_242390	hypothetical protein, unknown function	235
1	LDBPK_242380	cullin-like protein-like protein	744
1	LDBPK_242270	basal body component, putative	1438
1	LDBPK_241590	ATP-dependent DEAD/H DNA helicase recQ, putative	1946
1	LDBPK_241580	hypothetical protein, conserved	1151
1	LDBPK_241530	hypothetical protein, conserved	2560
1	LDBPK_241520	hypothetical protein, conserved	812
1	LDBPK_241490	hypothetical protein, conserved	537
1	LDBPK_241470	kinesin, putative	3274
1	LDBPK_241430	hypothetical protein, conserved, partial	270
1	LDBPK_241400	hypothetical protein, conserved	904
1	LDBPK_241270	hypothetical protein, conserved	355
1	LDBPK_241250	hypothetical protein, conserved	543
1	LDBPK_241160	actin-interacting protein-like protein	988
1	LDBPK_241150	hypothetical protein, conserved	802
1	LDBPK_241120	pre-mRNA splicing factor, putative	1086
1	LDBPK_241060	hypothetical protein, unknown function	920
1	LDBPK_240980	hypothetical protein, conserved	981
1	LDBPK_240970	hypothetical protein, conserved	398
1	LDBPK_240860	dynein arm light chain, putative	237
1	LDBPK_240770	DNA repair and recombination protein RAD54, putative	1126
1	LDBPK_240750	hypothetical protein, conserved	1079
1	LDBPK_240500	hypothetical protein, conserved	1786
1	LDBPK_240250	hypothetical protein, conserved	3171
1	LDBPK_240190	transcription elongation factor-like protein	235
1	LDBPK_240130	ankyrin/TPR repeat protein	394
1	LDBPK_240080	hypothetical protein, conserved	80
1	LDBPK_240060	hypothetical protein, conserved	400
1	LDBPK_240010	pyruvate dehydrogenase (lipoamide) kinase, putative	483
1	LDBPK_231570	dynein heavy chain, putative	4757
1	LDBPK_230900	RNA-binding protein, putative	599
1	LDBPK_230760	hypothetical protein, conserved	410
1	LDBPK_230520	hypothetical protein, conserved	1417
1	LDBPK_230350	hypothetical protein, conserved	1240
1	LDBPK_230070	hypothetical protein, conserved	173
1	LDBPK_230020	hypothetical protein, conserved	383
1	LDBPK_221420	hypothetical protein, conserved	363
1	LDBPK_221110	ribonucleoside-diphosphate reductase small chain, putative	269
1	LDBPK_220970	hypothetical protein, conserved	1056
1	LDBPK_220930	dynein heavy chain, cytosolic, putative	5661
1	LDBPK_220850	hypothetical protein, conserved	1326
1	LDBPK_220610	hypothetical protein, conserved	664
1	LDBPK_220130	hypothetical protein, conserved	282
1	LDBPK_220040	hypothetical protein, conserved	410
1	LDBPK_220030	hypothetical protein, conserved	475
1	LDBPK_220012	hypothetical protein, conserved	243
1	LDBPK_220011	methyltransferase, putative	1044
1	LDBPK_212220	hypothetical protein, conserved	1013
1	LDBPK_212120	hypothetical protein, conserved	385
1	LDBPK_212070	proteasome alpha 2 subunit, putative	231
1	LDBPK_212050	RNA-binding regulatory protein (pumilio family), putative	554
1	LDBPK_212010	protein kinase, putative	499
1	LDBPK_211990	calcineurin B subunit, putative	175
1	LDBPK_211850	hypothetical protein, conserved	437
1	LDBPK_211680	hypothetical protein, conserved	221
1	LDBPK_211630	hypothetical protein, conserved	367
1	LDBPK_211620	hypothetical protein, unknown function	1049
1	LDBPK_211290	60S ribosomal protein L9, putative	190
1	LDBPK_211100	mis-match repair protein, putative	1562
1	LDBPK_211000	hypothetical protein, conserved	2319
1	LDBPK_210820	ATPase subunit 9, putative	106
1	LDBPK_210790	hypothetical protein, conserved	381
1	LDBPK_210710	hypothetical protein, conserved	798
1	LDBPK_210580	hypothetical protein, conserved	447
1	LDBPK_210480	ferredoxin NADP+ reductase-like protein	699
1	LDBPK_210330	protein kinase, putative	1139
1	LDBPK_210260	major vault protein-like protein	959
1	LDBPK_210240	hypothetical protein, conserved	1475
1	LDBPK_210100	hypothetical protein, conserved	424
1	LDBPK_210090	hypothetical protein, conserved	493
1	LDBPK_201790	hypothetical protein, conserved	296
1	LDBPK_201770	hypothetical protein, conserved	1006
1	LDBPK_201750	hypothetical protein, conserved	1018
1	LDBPK_201740	aminoacylase, putative, partial	273
1	LDBPK_201700	mitochondrial RNA ligase 2	418
1	LDBPK_201630	hypothetical protein, conserved	403
1	LDBPK_201430	hypothetical protein, conserved	1254
1	LDBPK_201280	hypothetical protein, conserved	2757
1	LDBPK_201100	hypothetical protein, conserved	2481
1	LDBPK_201050	hypothetical protein, conserved	895
1	LDBPK_201040	hypothetical protein, conserved	336
1	LDBPK_201000	hypothetical protein, unknown function	508
1	LDBPK_200940	hypothetical protein, conserved	2088
1	LDBPK_200910	RNA editing complex protein MP90, putative	888
1	LDBPK_200860	hypothetical protein, conserved	1574
1	LDBPK_200610	hypothetical protein, conserved	232
1	LDBPK_200240	hypothetical protein, conserved	949
1	LDBPK_191170	hypothetical protein, conserved	1769
1	LDBPK_191130	hypothetical protein, unknown function	809
1	LDBPK_191030	hypothetical protein, conserved	1256
1	LDBPK_190880	hypothetical protein, conserved	905
1	LDBPK_190800	ATP-binding cassette protein subfamily F, member 2, putative	612
1	LDBPK_190590	protein kinase, putative	1674
1	LDBPK_190440	nucleosome assembly protein, putative	350
1	LDBPK_190430	hypothetical protein, conserved	1269
1	LDBPK_190170	mitogen activated protein kinase, putative	407
1	LDBPK_190090	fibrillarin, putative	299
1	LDBPK_190020	hypothetical protein, conserved	257
1	LDBPK_181670	hypothetical protein, unknown function	664
1	LDBPK_181660	gamma-glutamylcysteine synthetase, putative	687
1	LDBPK_181650	chaperone protein DNAj, putative	580
1	LDBPK_181570	nonspecific nucleoside hydrolasewith=GeneDB:LmjF18.1580	314
1	LDBPK_181270	hypothetical protein, conserved, partial	248
1	LDBPK_181220	prolyl-tRNA synthetase, putative, partial	361
1	LDBPK_181200	hypothetical protein, conserved	1039
1	LDBPK_181160	hypothetical protein, conserved	365
1	LDBPK_180990	UDP-glucose pyrophosphorylase	494
1	LDBPK_180910	hypothetical protein, conserved	1107
1	LDBPK_180820	hypothetical protein, conserved	2661
1	LDBPK_180810	ethanolamine phosphotransferase, putative	410
1	LDBPK_180770	hypothetical protein, conserved	1742
1	LDBPK_180650	serine/threonine kinase-like protein, putative	271
1	LDBPK_180590	RNA binding protein, putative	421
1	LDBPK_180440	phosphatidic acid phosphatase, putative	417
1	LDBPK_180430	hypothetical protein, unknown function	369
1	LDBPK_180240	hypothetical protein, conserved	404
1	LDBPK_180200	UDP-galactopyranose mutase	492
1	LDBPK_180040	transporter, putative	538
1	LDBPK_180030	hypothetical protein, conserved	344
1	LDBPK_171520	otubain, putative	270
1	LDBPK_171390	translation initiation factor, putative	709
1	LDBPK_171310	hypothetical protein, unknown function	455
1	LDBPK_171290	hypothetical protein, unknown function	479
1	LDBPK_171260	UDP-sugar pyrophosphorylase	630
1	LDBPK_171150	hydrolase-like protein	390
1	LDBPK_171060	hypothetical protein, conserved	1592
1	LDBPK_170940	hypothetical protein, conserved	514
1	LDBPK_170860	hypothetical protein, conserved	647
1	LDBPK_170780	hypothetical protein, conserved	557
1	LDBPK_170700	hypothetical protein, conserved	96
1	LDBPK_170630	hypothetical protein, conserved	1211
1	LDBPK_170560	hypothetical protein LDBPK_170560	1426
1	LDBPK_170500	hypothetical protein, conserved	1585
1	LDBPK_170480	hypothetical protein, conserved	1317
1	LDBPK_170380	hypothetical protein, conserved	1735
1	LDBPK_170310	hypothetical protein, conserved	785
1	LDBPK_170010	hypothetical protein, conserved	774
1	LDBPK_161740	hypothetical protein, unknown function	1637
1	LDBPK_161710	prohibitin	268
1	LDBPK_161600	hypothetical protein, conserved	570
1	LDBPK_161430	hypothetical protein, conserved	599
1	LDBPK_161340	hypothetical protein, conserved	732
1	LDBPK_161290	hypothetical protein, unknown function	2170
1	LDBPK_161010	hypothetical protein, conserved, partial	203
1	LDBPK_160980	hypothetical protein, conserved	761
1	LDBPK_160970	hypothetical protein, conserved	488
1	LDBPK_160960	sucrose-phosphate synthase-like protein	464
1	LDBPK_160930	flagellar calcium-binding protein, putative	195
1	LDBPK_160900	hypothetical protein, conserved	297
1	LDBPK_160730	ubiquitin hydrolase, putative	1895
1	LDBPK_160540	dihydroorotate dehydrogenase	313
1	LDBPK_160330	hypothetical protein, conserved	1270
1	LDBPK_160280	hypothetical protein, conserved	1042
1	LDBPK_151620	hypothetical protein, conserved	222
1	LDBPK_151600	presenilin-like aspartic peptidase, putative	352
1	LDBPK_151590	hypothetical protein, conserved	109
1	LDBPK_151180	protein kinase, putative	2701
1	LDBPK_151130	developmentally regulated protein, putative	116
1	LDBPK_151070	glutamate dehydrogenase	1020
1	LDBPK_151060	60S ribosomal protein L6, putative	169
1	LDBPK_150950	ATP-binding cassette protein subfamily G, member 4, putative	741
1	LDBPK_150750	hypothetical protein, conserved	3120
1	LDBPK_150740	hypothetical protein, conserved	948
1	LDBPK_150570	hypothetical protein, unknown function	1751
1	LDBPK_150560	hypothetical protein, conserved	414
1	LDBPK_150520	katanin-like protein	1002
1	LDBPK_150510	hypothetical protein, conserved	124
1	LDBPK_150290	hypothetical protein, conserved	1945
1	LDBPK_150110	hypothetical protein, conserved	797
1	LDBPK_150040	hypothetical protein, conserved	332
1	LDBPK_141430	hypothetical protein, conserved	622
1	LDBPK_141310	hypothetical protein, unknown function	568
1	LDBPK_141280	phosphatidylserine synthase, putative	531
1	LDBPK_141260	poly(A) polymerase, putative	709
1	LDBPK_141000	hypothetical protein, conserved	862
1	LDBPK_140770	fatty acid elongase, puatative	375
1	LDBPK_140470	cystathionine beta-lyase-like protein	519
1	LDBPK_140410	hypothetical protein, conserved	191
1	LDBPK_140050	hypothetical protein, conserved	733
1	LDBPK_131430	hypothetical protein, conserved	607
1	LDBPK_131380	mitogen-activated protein kinase 7, putative	574
1	LDBPK_131240	hypothetical protein, conserved	1392
1	LDBPK_130870	AMP deaminase, putative	1656
1	LDBPK_130700	hypothetical protein, conserved	2649
1	LDBPK_130650	hypothetical protein, conserved	2062
1	LDBPK_130390	RNA helicase, putative	2167
1	LDBPK_130310	hypothetical protein, conserved	1098
1	LDBPK_130080	mitochondrial DNA polymerase I protein B, putative	1430
1	LDBPK_120920	serine peptidase, putative	620
1	LDBPK_120910	hypothetical protein, conserved	971
1	LDBPK_120790	hypothetical protein, conserved	1608
1	LDBPK_120720	hypothetical protein, conserved	1287
1	LDBPK_120660	hypothetical protein, conserved	108
1	LDBPK_120650	hypothetical protein, conserved	850
1	LDBPK_120520	hypothetical protein, conserved	1369
1	LDBPK_120400	hypothetical protein, conserved	651
1	LDBPK_120330	hypothetical protein, unknown function	1477
1	LDBPK_120290	hypothetical protein, unknown function	2005
1	LDBPK_120220	hypothetical protein, unknown function	698
1	LDBPK_120120	unnamed protein product	1371
1	LDBPK_120110	unnamed protein product	900
1	LDBPK_120065	unnamed protein product	1410
1	LDBPK_120020	unnamed protein product	288
1	LDBPK_111160	eukaryotic release factor 3, putative	755
1	LDBPK_111140	protein transport protein Sec31, putative	1167
1	LDBPK_110990	adaptin-related protein-like protein	991
1	LDBPK_110770	40S ribosomal protein S21, putative, partial	79
1	LDBPK_110600	3-methylcrotonoyl-CoA carboxylase beta subunit, putative	536
1	LDBPK_110480	hypothetical protein LDBPK_110480	455
1	LDBPK_110250	protein kinase, putative	984
1	LDBPK_110050	SNF2/RAD54 related DNA helicase, putative	958
1	LDBPK_101400	hypothetical protein, conserved	315
1	LDBPK_101390	hypothetical protein, conserved	318
1	LDBPK_101170	hypothetical protein, conserved	78
1	LDBPK_101100	carrier protein, putative	395
1	LDBPK_100940	FKBP-type peptidyl-prolyl cis-trans isomerase, putative	159
1	LDBPK_100740	hypothetical protein, conserved	1675
1	LDBPK_100730	hypothetical protein, unknown function	505
1	LDBPK_100590	hypothetical protein, unknown function	1088
1	LDBPK_100550	hypothetical protein, conserved	6798
1	LDBPK_100370	folate/biopterin transporter, putative	691
1	LDBPK_100360	folate/biopterin transporter, putative	745
1	LDBPK_100320	hypothetical protein, conserved	765
1	LDBPK_100100	hypothetical protein, conserved	362
1	LDBPK_100090	hypothetical protein, conserved	395
1	LDBPK_100040	thymidylate kinase-like protein	363
1	LDBPK_100020	hypothetical protein, conserved	937
1	LDBPK_091090	hypothetical protein, conserved	313
1	LDBPK_091020	elongation factor-1 gamma	450
1	LDBPK_090320	hypothetical protein, conserved	875
1	LDBPK_090280	hypothetical protein, conserved	919
1	LDBPK_090140	hypothetical protein, conserved	711
1	LDBPK_090090	RNA helicase, putative	1234
1	LDBPK_090040	hypothetical protein, conserved	619
1	LDBPK_090020	hypothetical protein, conserved	373
1	LDBPK_090010	hypothetical protein, conserved	144
1	LDBPK_081070	hypothetical protein, conserved	426
1	LDBPK_080750	tuzin, putative, partial	331
1	LDBPK_080630	hypothetical protein, conserved	2883
1	LDBPK_080540	protein kinase, putative	2112
1	LDBPK_080400	hypothetical protein, conserved	1885
1	LDBPK_080300	iron superoxide dismutase	230
1	LDBPK_080180	hypothetical protein, unknown function	644
1	LDBPK_080160	hypothetical protein, conserved	499
1	LDBPK_080080	ATP-dependent DEAD/H RNA helicase, putative	685
1	LDBPK_071290	hypothetical protein, conserved	362
1	LDBPK_071100	hypothetical protein, conserved	2459
1	LDBPK_071010	hypothetical protein, unknown function	1473
1	LDBPK_070990	hypothetical protein, conserved, partial	119
1	LDBPK_070760	40S ribosomal protein S9, putative	1936
1	LDBPK_070640	hypothetical protein, conserved	1780
1	LDBPK_070620	hypothetical protein, conserved	465
1	LDBPK_070480	hypothetical protein, conserved	1045
1	LDBPK_070380	hypothetical protein, conserved	635
1	LDBPK_070220	hypothetical protein, conserved	192
1	LDBPK_070090	hypothetical protein, conserved	3599
1	LDBPK_061050	hypothetical protein, conserved	767
1	LDBPK_060980	glucosamine-fructose-6-phosphate aminotransferase, putative	670
1	LDBPK_060930	hypothetical protein, conserved	1845
1	LDBPK_060880	hypothetical protein, conserved	3585
1	LDBPK_060810	hypothetical protein, unknown function	3343
1	LDBPK_060750	hypothetical protein, conserved	1762
1	LDBPK_060490	hypothetical protein, conserved	1156
1	LDBPK_060330	hypothetical protein, conserved	1184
1	LDBPK_060140	proteasome beta 6 subunit, putative	247
1	LDBPK_060040	hypothetical protein, conserved	291
1	LDBPK_050950	glutaminyl cyclase, putative	907
1	LDBPK_050870	hypothetical protein, conserved	1938
1	LDBPK_050740	hypothetical protein, conserved	364
1	LDBPK_050590	ATP-dependent RNA helicase, putative	1006
1	LDBPK_050510	ATPase alpha subunit	574
1	LDBPK_050490	hypothetical protein, conserved	271
1	LDBPK_050430	hypothetical protein, conserved	675
1	LDBPK_050190	hypothetical protein, conserved	361
1	LDBPK_050010	hypothetical protein, conserved	915
1	LDBPK_044330	unnamed protein product	743
1	LDBPK_044310	unnamed protein product	397
1	LDBPK_041240	hypothetical protein, conserved	1061
1	LDBPK_041210	tRNA nucleotidyltransferase, putative	523
1	LDBPK_041200	hypothetical protein, conserved	2395
1	LDBPK_040910	hypothetical protein, conserved	247
1	LDBPK_040870	hypothetical protein LDBPK_040870	1184
1	LDBPK_040850	rhomboid-like protein	396
1	LDBPK_040410	hypothetical protein, conserved	4119
1	LDBPK_040340	hypothetical protein, conserved	2137
1	LDBPK_040310	beta-fructofuranosidase, putative, partial	37
1	LDBPK_040100	hypothetical protein, conserved	1872
1	LDBPK_040030	cAMP-specific phosphodiesterase, putative	724
1	LDBPK_040010	calcium-translocating P-type ATPase	1023
1	LDBPK_030940	hypothetical protein, conserved	104
1	LDBPK_030930	hypothetical protein, conserved	635
1	LDBPK_030830	hypothetical protein, conserved	2322
1	LDBPK_030810	hypothetical protein, conserved	2899
1	LDBPK_030700	hypothetical protein, conserved	1106
1	LDBPK_030400	hypothetical protein, conserved	1668
1	LDBPK_030370	hypothetical protein, conserved	359
1	LDBPK_030340	hypothetical protein LDBPK_030340	1651
1	LDBPK_030330	protein kinase, putative	1454
1	LDBPK_030110	hypothetical protein, conserved	925
1	LDBPK_030100	hypothetical protein, conserved	891
1	LDBPK_030060	hypothetical protein, conserved	833
1	LDBPK_030020	hypothetical protein, conserved	268
1	LDBPK_020470	hypothetical protein, conserved	949
1	LDBPK_020140	phosphoglycan beta 1,3 galactosyltransferase, partial	344
1	LDBPK_020080	hypothetical protein, conserved	917
1	LDBPK_010830	calcium/potassium channel (CAKC), putative	1017
1	LDBPK_010680	hypothetical protein, conserved	1548
1	LDBPK_010440	ribosomal protein S7, putative	200
1	LDBPK_010310	acidocalcisomal exopolyphosphatase, putative	387
1	LDBPK_010260	hypothetical protein, conserved	281
1	LDBPK_010180	CLC-type chloride channel, putative	770
1	LDBPK_010010	hypothetical protein, unknown function	333
