# Supplementary material for: Insights into Genetic Heterogeneity and Drug Resistance in Leishmania donovani of the Indian sub-continent from genomic data
Source: Research Square preprint supplement (doi:10.21203/rs.3.rs-7267613/v1), 2025-08-11
Supplement: Supplementary file 2 [file 63f4b657cf2aff18cb0aa564.docx]

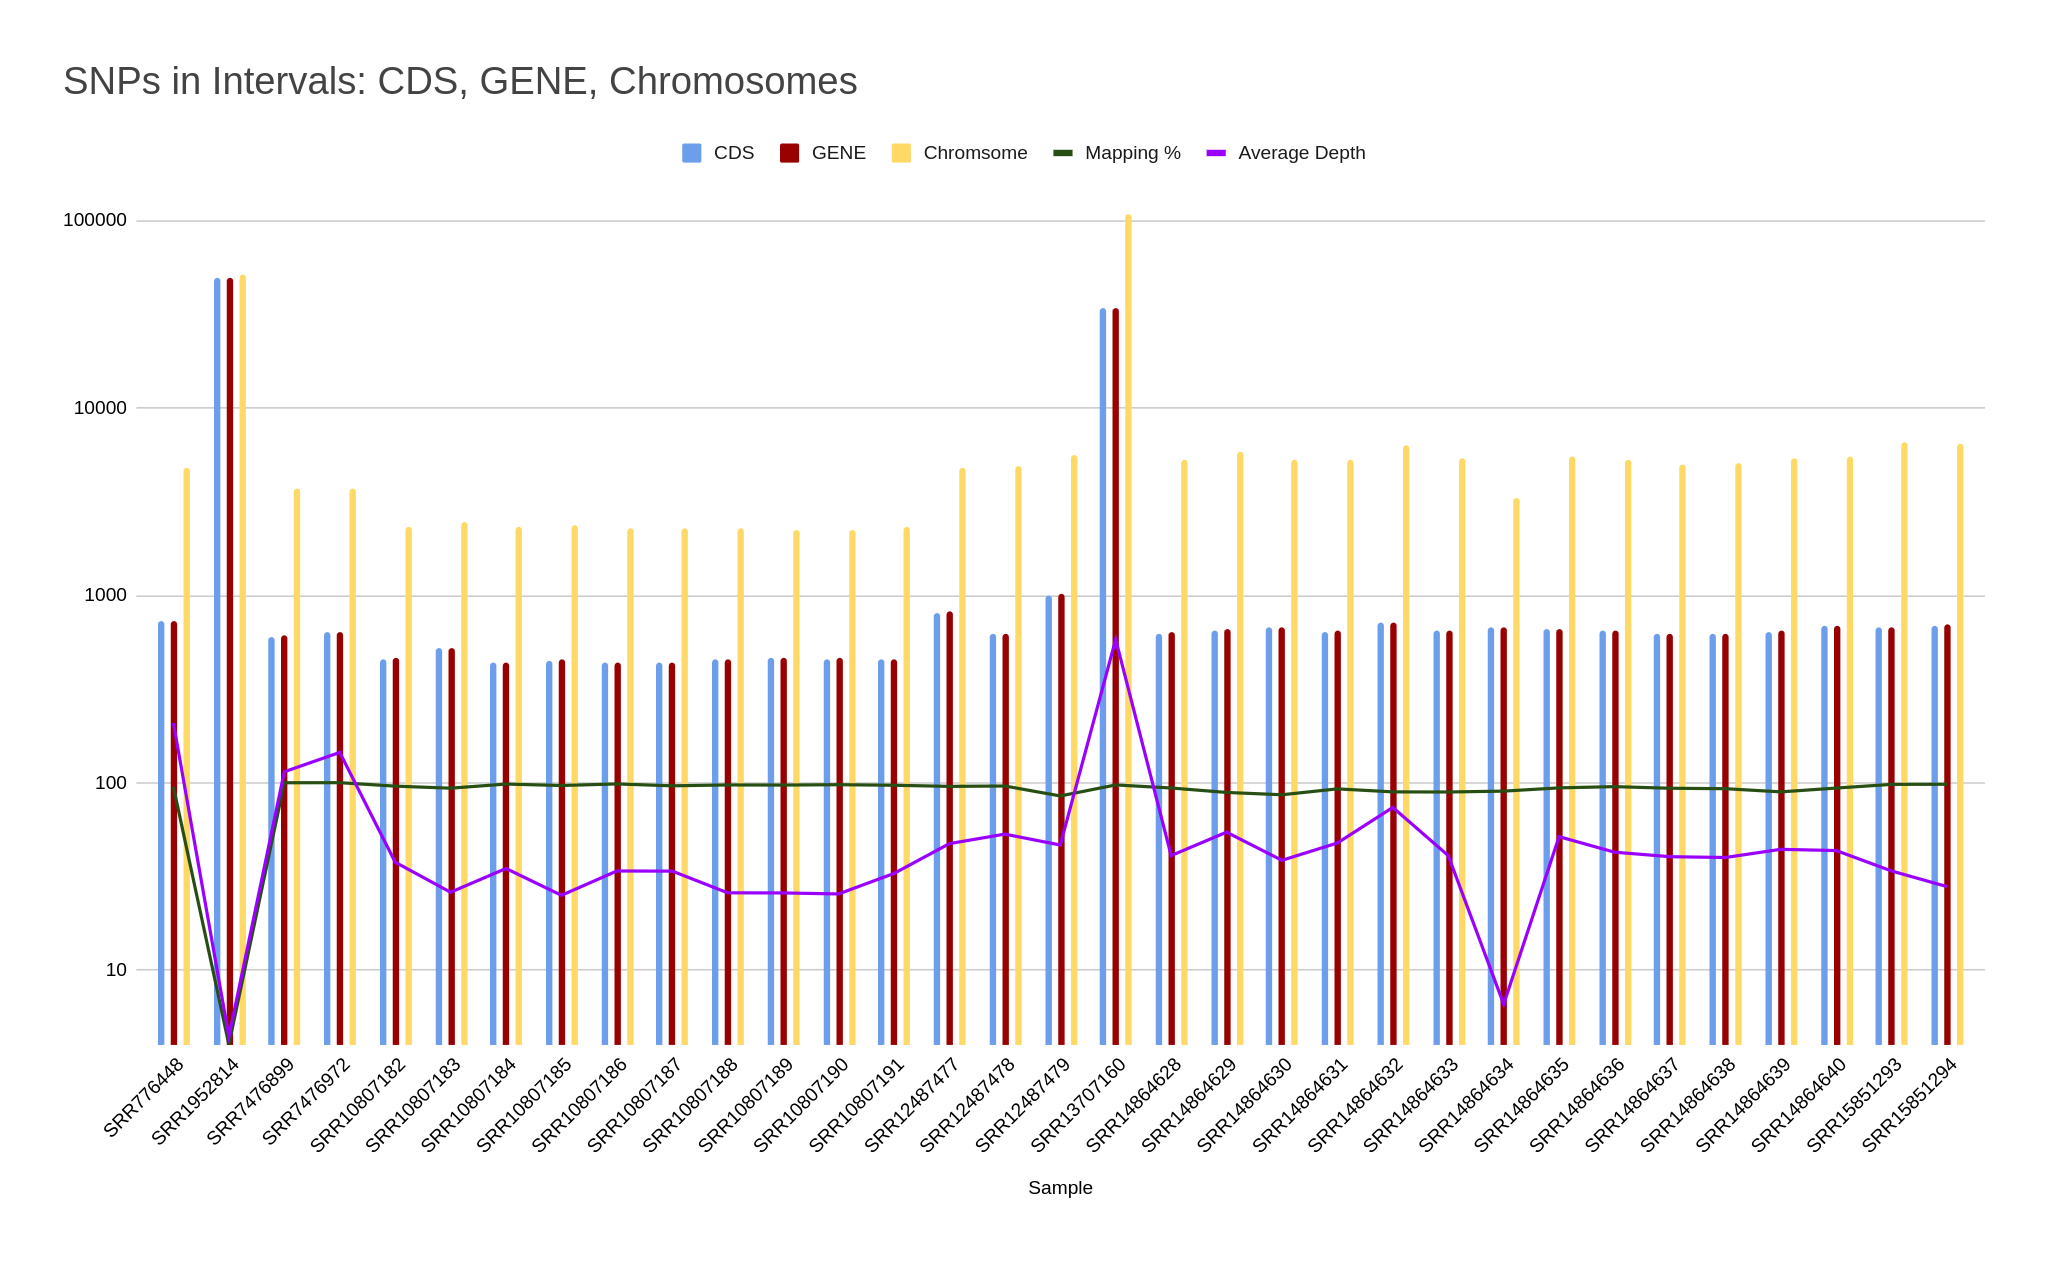


**Supplementary** **Figure 1:** The distribution of variants in the samples of *L. Donovani* across the coding sequecnes, gene intervals and chromosomal intervals has been represented in the graph.


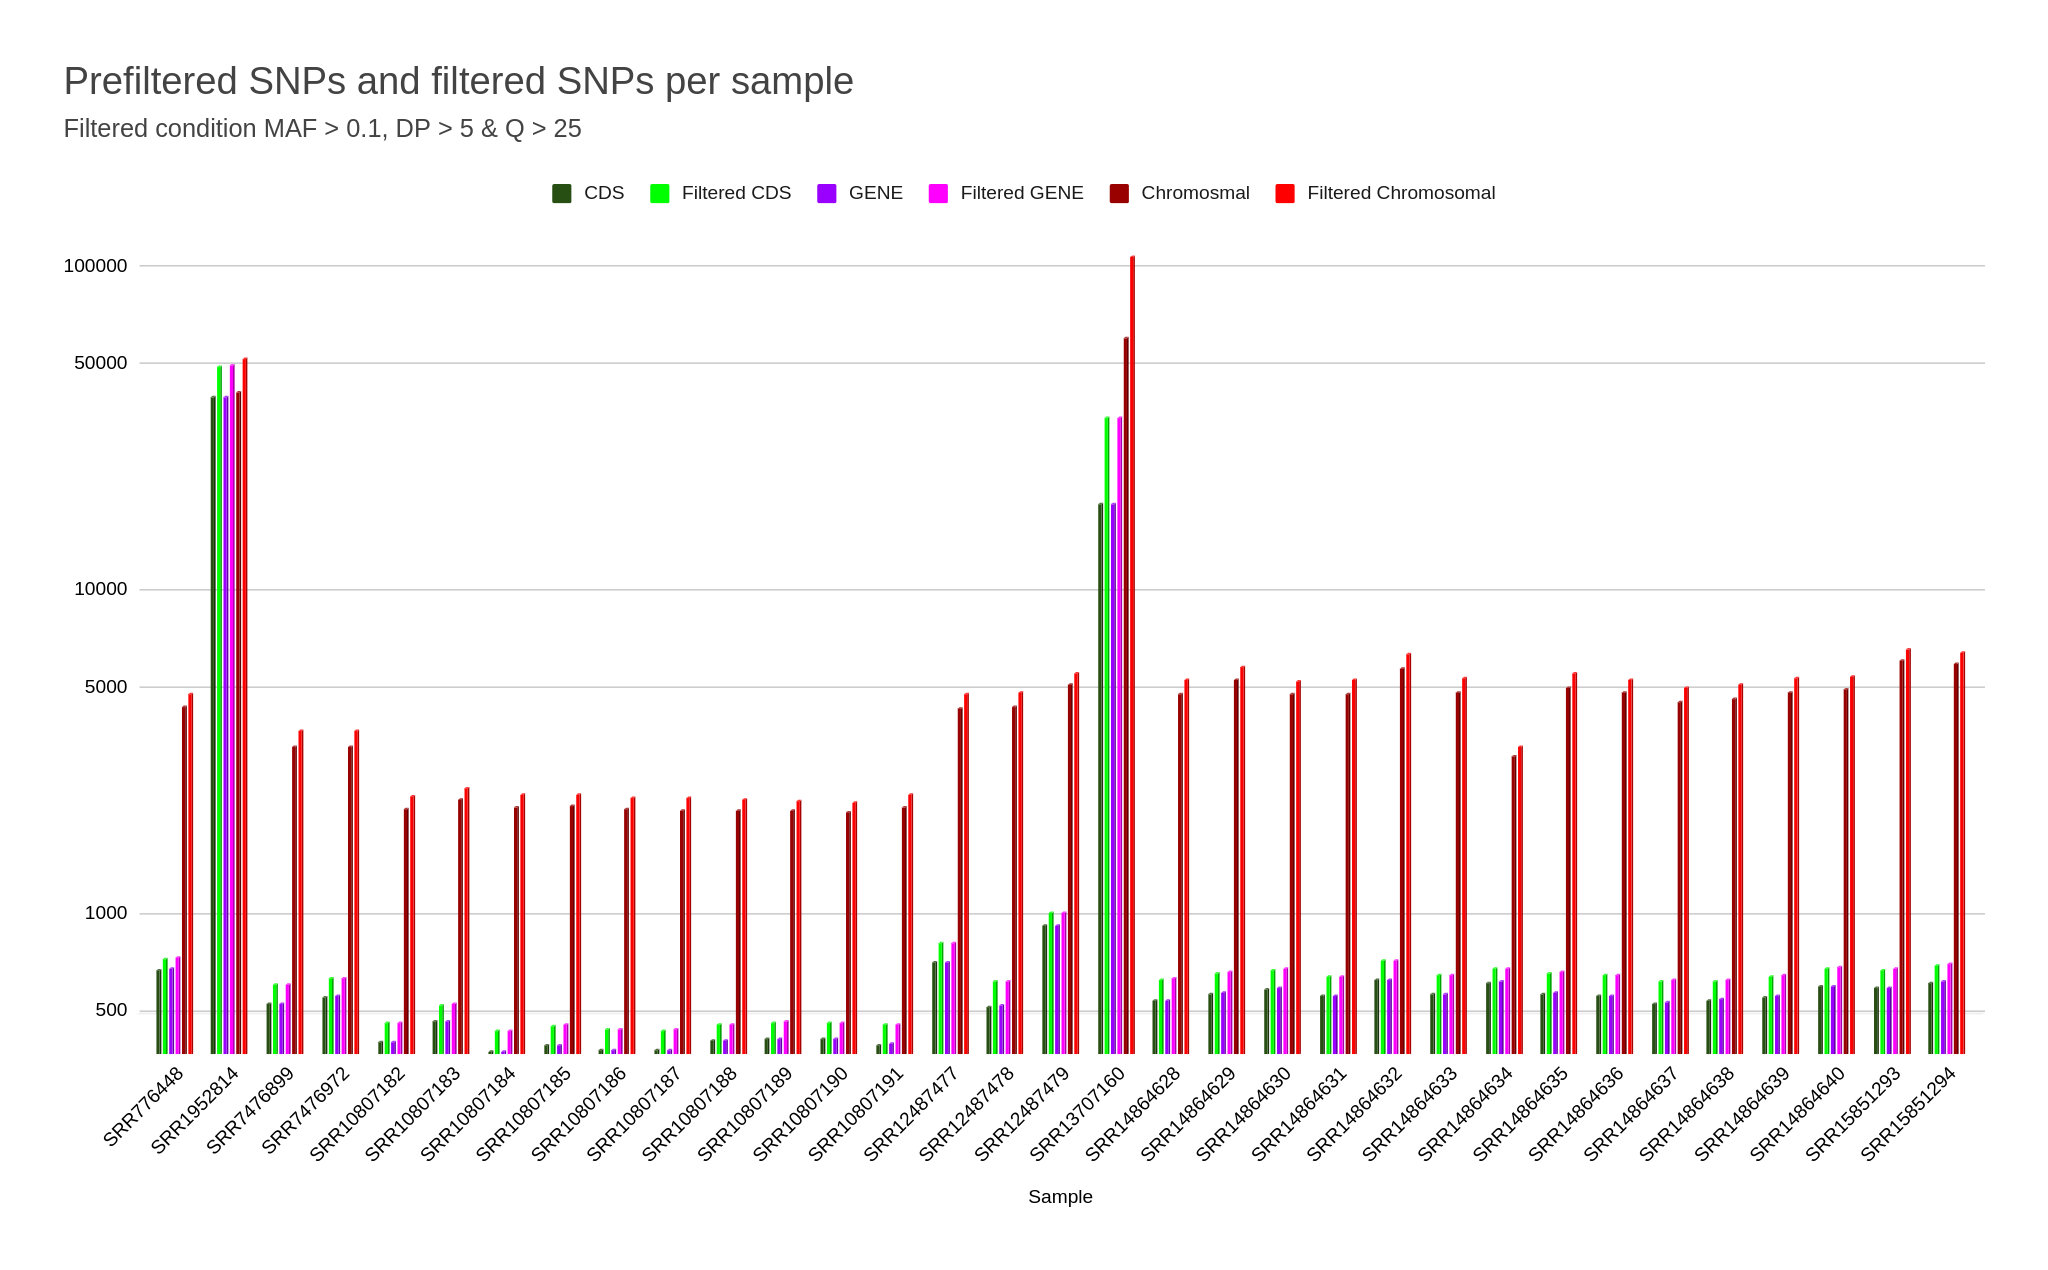


**Supplementary** **Figure 2:** After the application of hard GATK filters, the variants with high quality are retained for further analysis. The graph show the difference between the unfiltered and filtered variants of the samples.


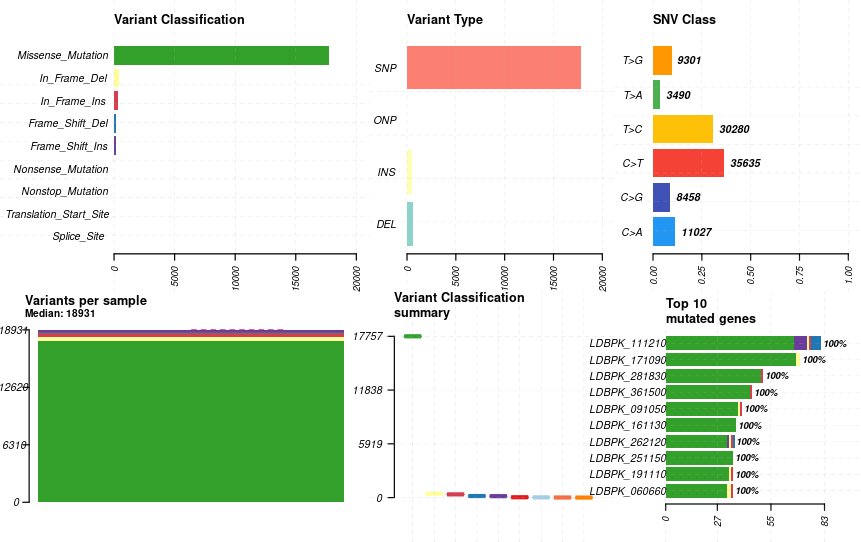
**Supplementary** **Figure 3:** The variant classification distribution, types of variant and top10 mutated genes in HPCL66.s
