# Supplementary material for: Insights into Genetic Heterogeneity and Drug Resistance in Leishmania donovani of the Indian sub-continent from genomic data
Source: Research Square preprint supplement (doi:10.21203/rs.3.rs-7267613/v1), 2025-08-11
Supplement: Supplementary file 3 [file a18a501cbb3d8e9e02f5723a.xlsx]

## Sheet: Sheet1
Gene	Variant class	Variant Type	Variant	Variant Impact
LDBPK_366850	5'Flank	DEL	c.-4473 del G	MODIFIER
LDBPK_365520	5'Flank	DEL	c.-3460--3459 del GC	MODIFIER
LDBPK_351510	In_Frame_Ins	INS	c.330-331 ins TCG	MODERATE
LDBPK_351510	In_Frame_Del	DEL	c.320-328 del TGGAGAAGA	MODERATE
LDBPK_341720	5'Flank	INS	c.-203--202 ins TA	MODIFIER
LDBPK_341720	5'Flank	DEL	c.-206--205 del GC	MODIFIER
LDBPK_341690	5'Flank	DEL	c.-2183--2182 del AC	MODIFIER
LDBPK_341150	Frame_Shift_Ins	INS	c.109-110 ins GGAGG	HIGH
LDBPK_341140	5'Flank	INS	c.-3733--3732 ins AC	MODIFIER
LDBPK_341140	5'Flank	DEL	c.-4075--4069 del TCTGCGC	MODIFIER
LDBPK_340710	Frame_Shift_Ins	INS	c.1558-1559 ins AG	HIGH
LDBPK_340710	Frame_Shift_Del	DEL	c.1551-1552 del AT	HIGH
LDBPK_340530	5'Flank	INS	c.-3821--3820 ins CG	MODIFIER
LDBPK_333030-LDBPK_333040	IGR	INS	n.1217318-1217319 ins CC	MODIFIER
LDBPK_333030-LDBPK_333040	IGR	DEL	n.1217310-1217311 del TG	MODIFIER
LDBPK_321030	3'Flank	INS	c.*1856-*1857 ins G	MODIFIER
LDBPK_311920	Frame_Shift_Ins	INS	c.1552-1553 ins ACAGT	HIGH
LDBPK_311920	Frame_Shift_Del	DEL	c.1545-1549 del CCATC	HIGH
LDBPK_311470	Frame_Shift_Del	DEL	c.390-391 del CC	HIGH
LDBPK_311300	5'Flank	INS	c.-4951--4950 ins CGAGG	MODIFIER
LDBPK_311300	5'Flank	INS	c.-4917--4916 ins CGGAACCGACTGACAACAGAGAG	MODIFIER
LDBPK_311300	5'Flank	DEL	c.-4948--4921 del ATTTTTTTTTTTTTTTTTTTTTTTTTTT	MODIFIER
LDBPK_310950	In_Frame_Del	DEL	c.1311-1313 del CGC	MODERATE
LDBPK_310950	Frame_Shift_Ins	INS	c.1317-1318 ins ACTG	HIGH
LDBPK_310950	Frame_Shift_Del	DEL	c.1321 del C	HIGH
LDBPK_310880	5'Flank	DEL	c.-230 del C	MODIFIER
LDBPK_310470	3'Flank	INS	c.*3355-*3356 ins GAG	MODIFIER
LDBPK_302570	5'Flank	INS	c.-3825--3824 ins CA	MODIFIER
LDBPK_300430	5'Flank	INS	c.-3950--3949 ins A	MODIFIER
LDBPK_292790	5'Flank	INS	c.-2006--2005 ins T	MODIFIER
LDBPK_292790	5'Flank	INS	c.-2000--1999 ins C	MODIFIER
LDBPK_292790	5'Flank	DEL	c.-2011--2010 del TT	MODIFIER
LDBPK_282130	5'Flank	DEL	c.-2893 del A	MODIFIER
LDBPK_281790	In_Frame_Del	DEL	c.2002-2040 del AGCTACCCCGAGTACTTCA CCACCTGGCCCTACCCTGAC	MODERATE
LDBPK_271060	5'Flank	INS	c.-4265--4264 ins AATG	MODIFIER
LDBPK_261990	5'Flank	INS	c.-2949--2948 ins TA	MODIFIER
LDBPK_261780	5'Flank	DEL	c.-1896--1885 del GCCGCTGCCGCT	MODIFIER
LDBPK_251600	5'Flank	INS	c.-2294--2293 ins AG	MODIFIER
LDBPK_240440	In_Frame_Ins	INS	c.1277-1278 ins CTG	MODERATE
LDBPK_240440	In_Frame_Ins	INS	c.1276-1277 ins GGC	MODERATE
LDBPK_240440	In_Frame_Del	DEL	c.1266-1271 del CGATGA	MODERATE
LDBPK_240440	Frame_Shift_Ins	INS	c.1280-1281 ins TCGG	HIGH
LDBPK_240440	Frame_Shift_Del	DEL	c.1283-1286 del ATAA	HIGH
LDBPK_240360	3'Flank	INS	c.*541-*542 ins AAC	MODIFIER
LDBPK_240360	3'Flank	DEL	c.*538-*540 del ATT	MODIFIER
LDBPK_230270	5'Flank	INS	c.-1991--1990 ins G	MODIFIER
LDBPK_220560	Frame_Shift_Ins	INS	c.1404-1405 ins TG	HIGH
LDBPK_220560	Frame_Shift_Del	DEL	c.1399-1400 del TA	HIGH
LDBPK_211850	3'Flank	DEL	c.*2321-*2322 del AC	MODIFIER
LDBPK_211170	5'Flank	INS	c.-609--608 ins CA	MODIFIER
LDBPK_211170	5'Flank	INS	c.-580--579 ins GT	MODIFIER
LDBPK_211170	5'Flank	DEL	c.-577--576 del TC	MODIFIER
LDBPK_211170	5'Flank	DEL	c.-515 del G	MODIFIER
LDBPK_191310	5'Flank	INS	c.-4288--4287 ins AT	MODIFIER
LDBPK_181180	5'Flank	INS	c.-1040--1039 ins TG	MODIFIER
LDBPK_140400	Frame_Shift_Ins	INS	c.176-177 ins AC	HIGH
LDBPK_140400	Frame_Shift_Del	DEL	c.171-172 del CG	HIGH
LDBPK_131310	5'Flank	DEL	c.-3357 del C	MODIFIER
LDBPK_120667-LDBPK_120700	IGR	DEL	n.432416 del C	MODIFIER
LDBPK_120661-LDBPK_120667	IGR	INS	n.403847-403848 ins CC	MODIFIER
LDBPK_120661-LDBPK_120667	IGR	DEL	n.403844-403845 del TG	MODIFIER
LDBPK_120661	3'Flank	INS	c.*3543-*3544 ins GCTGCC	MODIFIER
LDBPK_120661	3'Flank	INS	c.*2627-*2628 ins C	MODIFIER
LDBPK_120661	3'Flank	DEL	c.*3538-*3543 del AAAAAA	MODIFIER
LDBPK_120661	3'Flank	DEL	c.*3099-*3100 del AC	MODIFIER
LDBPK_111360	3'Flank	INS	c.*3883-*3884 ins G	MODIFIER
LDBPK_111210	Frame_Shift_Ins	INS	c.585-586 ins TA	HIGH
LDBPK_111210	Frame_Shift_Ins	INS	c.567-568 ins CTTGC	HIGH
LDBPK_111210	Frame_Shift_Ins	INS	c.557-558 ins A	HIGH
LDBPK_111210	Frame_Shift_Del	DEL	c.580-581 del CA	HIGH
LDBPK_111210	Frame_Shift_Del	DEL	c.572 del A	HIGH
LDBPK_111210	Frame_Shift_Del	DEL	c.559-563 del GGTGT	HIGH
LDBPK_101460	3'Flank	DEL	c.*4048-*4056 del GGGGGTGCA	MODIFIER
LDBPK_100560	3'Flank	DEL	c.*3745-*3765 del CCACCATCGCGGGCGTATACG	MODIFIER
LDBPK_100510	3'Flank	DEL	c.*128-*130 del TAG	MODIFIER
LDBPK_100480	3'Flank	INS	c.*1362-*1363 ins TG	MODIFIER
LDBPK_093020	5'Flank	INS	c.-1429--1428 ins A	MODIFIER
LDBPK_080760-LDBPK_080780	IGR	INS	n.333727-333728 ins CGT	MODIFIER
LDBPK_080760-LDBPK_080780	IGR	INS	n.333692-333693 ins CA	MODIFIER
LDBPK_080760-LDBPK_080780	IGR	DEL	n.333723-333725 del CCA	MODIFIER
LDBPK_080760-LDBPK_080780	IGR	DEL	n.333696-333697 del GA	MODIFIER
LDBPK_080750	3'Flank	DEL	c.*3567-*3568 del CG	MODIFIER
LDBPK_080750	3'Flank	DEL	c.*3187 del G	MODIFIER
LDBPK_080740	3'Flank	INS	c.*3822-*3823 ins CG	MODIFIER
LDBPK_080740	3'Flank	DEL	c.*3830-*3831 del CT	MODIFIER
LDBPK_072500	3'Flank	DEL	c.*1608-*1609 del CA	MODIFIER
LDBPK_071240	5'Flank	DEL	c.-85 del C	MODIFIER
LDBPK_071240	5'Flank	DEL	c.-77 del C	MODIFIER
LDBPK_044360-CHR_END	IGR	INS	n.1744436-1744437 ins GA	MODIFIER
LDBPK_020710	3'Flank	DEL	c.*658-*659 del TG	MODIFIER
LDBPK_010850-CHR_END	IGR	DEL	n.277777-277778 del AG	MODIFIER
