# Supplementary material for: Insights into Genetic Heterogeneity and Drug Resistance in Leishmania donovani of the Indian sub-continent from genomic data
Source: Research Square preprint supplement (doi:10.21203/rs.3.rs-7267613/v1), 2025-08-11
Supplement: Supplementary file 4 [file b9d76b4ba98ec419d870e2d0.xlsx]

## Sheet: Sheet1
gene_id	name	length	domain	domain_name	variant
LDBPK_366560	glucose transporter, lmgt1	653	131-624	Major facilitator superfamily (MFS) profile	p.Arg199His, p.Ala451Thr
LDBPK_364000	aminomethyltransferase, mitochondrial precursor, putative	377	10-261, 294-368	Aminomethyltransferase folate-binding, Glycine cleavage T-protein C-terminal barrel	p.Leu144Val
LDBPK_341150	amastin-like surface protein, putative	223	7-27, 81-102, 109-134, 154-173	transmembrane	p.Thr121Ser, p.Leu65Val, p.Ala67Thr, p.Gln64Glu, p.Thr61Lys
LDBPK_311920	mannosyltransferase-like protein	857	709-828	Glycosyl transferase family 1	p.Ala720Thr, p.Glu679Gly, p.Tyr676His, p.His674Arg, p.Ser637Asn, p.Ser637Gly, p.Arg514Gly
LDBPK_311850	Amino acid permease	296	86-269	Amino acid transporter transmembrane	p.Leu139Val
LDBPK_303560	S-adenosylmethionine synthetase	392	6-103, 117-241, 244-385	S-adenosylmethionine synthetase N-terminal, S-adenosylmethionine synthetase central, S-adenosylmethionine synthetase C-terminal	p.Gly134Glu
LDBPK_300590	spliceosome-associated protein, putative	474	264-318	PSP Proline-rich	p.Lys439Gln
LDBPK_272520	Cysteine peptidase, Clan CA, family C2, putative	1522	1-303, 648-918	Calpain catalytic	p.Lys634Arg, p.Phe514Tyr, p.Thr495Met
LDBPK_270840	ATP-binding cassette protein subfamily A, member 9, putative	1879	760-993, 1547-1777	ABC transporter	p.Val1407Ala, p.Ile1327Val, p.Lys1428Ile, p.Lys1428Glu
LDBPK_260160	60S ribosomal protein L7, putative	252	19-89, 95-144	Ribosomal protein L30 N-terminal, Ribosomal protein L30 ferredoxin-like fold	p.Lys172Arg
LDBPK_190940	4-coumarate:coa ligase-like protein	612	70-481, 481-573	AMP-dependent synthetase/ligase, AMP-binding enzyme C-terminal	p.Ala413Thr
LDBPK_190140	Mitogen-activated protein kinase kinase kinase, putative	280	12-278	Protein kinase	p.Leu174Ser
LDBPK_180770	PDZ domain-containing protein	1742	1539-1576	PDZ	p.Arg132Gly
LDBPK_160450	fucose kinase, putative	1186	102-303, 945-1000	L-fucokinase GHMP kinase N-terminal	p.Ala151Thr
LDBPK_151540	cAMP specific phosphodiesterase, putative	940	601-931	PDEase	p.Lys550Gln, p.Gln546Arg, p.Val349Ile
LDBPK_151140	tryparedoxin peroxidase	199	6-165	Thioredoxin	p.Thr49Ser, p.Val39Ile, p.Ala58Glu, p.Ala58Pro
LDBPK_111210	ATP-binding cassette protein subfamily A, member 2, putative	1776	610-843, 1442-1672	ABC transporter	p.Thr205Ala, p.Thr195Lys, p.Leu190Phe, p.His184Tyr, p.Arg157Ser, p.Arg156Leu, p.Ala875Thr, p.Arg942Gly, p.Thr941Ile, p.Ala593Thr, p.Val505Ala
LDBPK_081130	RING-type domain-containing protein	506	59-103	RING-type	p.Arg388Cys
LDBPK_080960	Cathepsin L-like protease	345	38-94, 126-339	Cathepsin propeptide inhibitor, Peptidase C1A papain C-terminal	p.Gln237Arg, p.Ala20Asp, p.Ala166Val, p.Asn143Asp
LDBPK_070700	P-type Ca(2+) transporter	937	52-124	Cation-transporting P-type ATPase N-terminal	p.Tyr666Cys, p.Pro664Arg
